# Supplementary material for: Unlocking the air: DNA metabarcoding sheds light on seasonal fungal dynamics in a temperate floodplain forest
Source: Copernicus journal article supplement (doi:10.5194/egusphere-2026-372), 2026-01-30
Supplement: Supplementary file 1 [file Supplementary_Tables_Figures_LCCpaper2.xlsx]

## Sheet: Table_S1
Table S2.1 Meteorological and sampling variables considered in the analysis of fungal spore aerosols.
Period	Sample ID	Month	Location	Height	Average wind speed (m/s)	Maximum wind speed (m/s)	Minimum air temperature (°C)	Average air temperature (°C)	Maximum air temperature (°C)	Minimum relative humidity (%)	Averaerage relative humidity (%)	Maximum relative humidity (%)	Rainfall precipitations (mm)
March 2019	t1h1_1903	2019_03	trap_1	Height_1	2.21	6.1	1.4	8.63	18.4	28.9	64.13	90.4	1.23
March 2019	t1h2_1903	2019_03	trap_1	Height_2	2.21	6.1	1.4	8.63	18.4	28.9	64.13	90.4	1.23
March 2019	t1h3_1903	2019_03	trap_1	Height_3	2.21	6.1	1.4	8.63	18.4	28.9	64.13	90.4	1.23
March 2019	t2h1_1903	2019_03	trap_2	Height_1	2.21	6.1	1.4	8.63	18.4	28.9	64.13	90.4	1.23
March 2019	t2h2_1903	2019_03	trap_2	Height_2	2.21	6.1	1.4	8.63	18.4	28.9	64.13	90.4	1.23
March 2019	t2h3_1903	2019_03	trap_2	Height_3	2.21	6.1	1.4	8.63	18.4	28.9	64.13	90.4	1.23
March 2019	t3h1_1903	2019_03	trap_3	Height_1	2.21	6.1	1.4	8.63	18.4	28.9	64.13	90.4	1.23
March 2019	t3h2_1903	2019_03	trap_3	Height_2	2.21	6.1	1.4	8.63	18.4	28.9	64.13	90.4	1.23
March 2019	t3h3_1903	2019_03	trap_3	Height_3	2.21	6.1	1.4	8.63	18.4	28.9	64.13	90.4	1.23
April 2019	t1h1_1904	2019_04	trap_1	Height_1	2.8	8.1	2.9	13.11	24.7	22.5	60.06	89.1	5.59
April 2019	t1h2_1904	2019_04	trap_1	Height_2	2.8	8.1	2.9	13.11	24.7	22.5	60.06	89.1	5.59
April 2019	t1h3_1904	2019_04	trap_1	Height_3	2.8	8.1	2.9	13.11	24.7	22.5	60.06	89.1	5.59
April 2019	t2h1_1904	2019_04	trap_2	Height_1	2.8	8.1	2.9	13.11	24.7	22.5	60.06	89.1	5.59
April 2019	t2h2_1904	2019_04	trap_2	Height_2	2.8	8.1	2.9	13.11	24.7	22.5	60.06	89.1	5.59
April 2019	t2h3_1904**	2019_04	trap_2	Height_3	2.8	8.1	2.9	13.11	24.7	22.5	60.06	89.1	5.59
April 2019	t3h1_1904	2019_04	trap_3	Height_1	2.8	8.1	2.9	13.11	24.7	22.5	60.06	89.1	5.59
April 2019	t3h2_1904	2019_04	trap_3	Height_2	2.8	8.1	2.9	13.11	24.7	22.5	60.06	89.1	5.59
April 2019	t3h3_1904	2019_04	trap_3	Height_3	2.8	8.1	2.9	13.11	24.7	22.5	60.06	89.1	5.59
May 2019	t1h1_1905	2019_05	trap_1	Height_1	2.03	5.8	8.3	15.44	22.5	30.3	62.66	90.6	0.7
May 2019	t1h2_1905	2019_05	trap_1	Height_2	2.03	5.8	8.3	15.44	22.5	30.3	62.66	90.6	0.7
May 2019	t1h3_1905	2019_05	trap_1	Height_3	2.03	5.8	8.3	15.44	22.5	30.3	62.66	90.6	0.7
May 2019	t2h1_1905	2019_05	trap_2	Height_1	2.03	5.8	8.3	15.44	22.5	30.3	62.66	90.6	0.7
May 2019	t2h2_1905	2019_05	trap_2	Height_2	2.03	5.8	8.3	15.44	22.5	30.3	62.66	90.6	0.7
May 2019	t2h3_1905	2019_05	trap_2	Height_3	2.03	5.8	8.3	15.44	22.5	30.3	62.66	90.6	0.7
May 2019	t3h1_1905	2019_05	trap_3	Height_1	2.03	5.8	8.3	15.44	22.5	30.3	62.66	90.6	0.7
May 2019	t3h2_1905	2019_05	trap_3	Height_2	2.03	5.8	8.3	15.44	22.5	30.3	62.66	90.6	0.7
May 2019	t3h3_1905	2019_05	trap_3	Height_3	2.03	5.8	8.3	15.44	22.5	30.3	62.66	90.6	0.7
June 2019	t1h1_1906	2019_06	trap_1	Height_1	2.09	5.3	14.4	23.01	33.3	18.3	50.31	88.2	5.42
June 2019	t1h2_1906	2019_06	trap_1	Height_2	2.09	5.3	14.4	23.01	33.3	18.3	50.31	88.2	5.42
June 2019	t1h3_1906	2019_06	trap_1	Height_3	2.09	5.3	14.4	23.01	33.3	18.3	50.31	88.2	5.42
June 2019	t2h1_1906	2019_06	trap_2	Height_1	2.09	5.3	14.4	23.01	33.3	18.3	50.31	88.2	5.42
June 2019	t2h2_1906	2019_06	trap_2	Height_2	2.09	5.3	14.4	23.01	33.3	18.3	50.31	88.2	5.42
June 2019	t2h3_1906	2019_06	trap_2	Height_3	2.09	5.3	14.4	23.01	33.3	18.3	50.31	88.2	5.42
June 2019	t3h1_1906	2019_06	trap_3	Height_1	2.09	5.3	14.4	23.01	33.3	18.3	50.31	88.2	5.42
June 2019	t3h2_1906	2019_06	trap_3	Height_2	2.09	5.3	14.4	23.01	33.3	18.3	50.31	88.2	5.42
June 2019	t3h3_1906	2019_06	trap_3	Height_3	2.09	5.3	14.4	23.01	33.3	18.3	50.31	88.2	5.42
July 2019	t1h1_1907	2019_07	trap_1	Height_1	1.54	4.9	14.6	20.61	28	32.1	64.08	89.6	16.24
July 2019	t1h2_1907	2019_07	trap_1	Height_2	1.54	4.9	14.6	20.61	28	32.1	64.08	89.6	16.24
July 2019	t1h3_1907	2019_07	trap_1	Height_3	1.54	4.9	14.6	20.61	28	32.1	64.08	89.6	16.24
July 2019	t2h1_1907	2019_07	trap_2	Height_1	1.54	4.9	14.6	20.61	28	32.1	64.08	89.6	16.24
July 2019	t2h2_1907	2019_07	trap_2	Height_2	1.54	4.9	14.6	20.61	28	32.1	64.08	89.6	16.24
July 2019	t2h3_1907	2019_07	trap_2	Height_3	1.54	4.9	14.6	20.61	28	32.1	64.08	89.6	16.24
July 2019	t3h1_1907	2019_07	trap_3	Height_1	1.54	4.9	14.6	20.61	28	32.1	64.08	89.6	16.24
July 2019	t3h2_1907	2019_07	trap_3	Height_2	1.54	4.9	14.6	20.61	28	32.1	64.08	89.6	16.24
July 2019	t3h3_1907	2019_07	trap_3	Height_3	1.54	4.9	14.6	20.61	28	32.1	64.08	89.6	16.24
August 2019	t1h1_1908	2019_08	trap_1	Height_1	1.52	4.2	10.5	22.38	33.2	27.8	56.53	88.8	2.68
August 2019	t1h2_1908	2019_08	trap_1	Height_2	1.52	4.2	10.5	22.38	33.2	27.8	56.53	88.8	2.68
August 2019	t1h3_1908	2019_08	trap_1	Height_3	1.52	4.2	10.5	22.38	33.2	27.8	56.53	88.8	2.68
August 2019	t2h1_1908	2019_08	trap_2	Height_1	1.52	4.2	10.5	22.38	33.2	27.8	56.53	88.8	2.68
August 2019	t2h2_1908	2019_08	trap_2	Height_2	1.52	4.2	10.5	22.38	33.2	27.8	56.53	88.8	2.68
August 2019	t2h3_1908	2019_08	trap_2	Height_3	1.52	4.2	10.5	22.38	33.2	27.8	56.53	88.8	2.68
August 2019	t3h1_1908	2019_08	trap_3	Height_1	1.52	4.2	10.5	22.38	33.2	27.8	56.53	88.8	2.68
August 2019	t3h2_1908	2019_08	trap_3	Height_2	1.52	4.2	10.5	22.38	33.2	27.8	56.53	88.8	2.68
August 2019	t3h3_1908	2019_08	trap_3	Height_3	1.52	4.2	10.5	22.38	33.2	27.8	56.53	88.8	2.68
September 2019	t1h1_1909	2019_09	trap_1	Height_1	2.48	8	11.3	15.95	21.6	45.7	70.44	89.2	9.35
September 2019	t1h2_1909	2019_09	trap_1	Height_2	2.48	8	11.3	15.95	21.6	45.7	70.44	89.2	9.35
September 2019	t1h3_1909	2019_09	trap_1	Height_3	2.48	8	11.3	15.95	21.6	45.7	70.44	89.2	9.35
September 2019	t2h1_1909	2019_09	trap_2	Height_1	2.48	8	11.3	15.95	21.6	45.7	70.44	89.2	9.35
September 2019	t2h2_1909	2019_09	trap_2	Height_2	2.48	8	11.3	15.95	21.6	45.7	70.44	89.2	9.35
September 2019	t2h3_1909	2019_09	trap_2	Height_3	2.48	8	11.3	15.95	21.6	45.7	70.44	89.2	9.35
September 2019	t3h1_1909	2019_09	trap_3	Height_1	2.48	8	11.3	15.95	21.6	45.7	70.44	89.2	9.35
September 2019	t3h2_1909	2019_09	trap_3	Height_2	2.48	8	11.3	15.95	21.6	45.7	70.44	89.2	9.35
September 2019	t3h3_1909	2019_09	trap_3	Height_3	2.48	8	11.3	15.95	21.6	45.7	70.44	89.2	9.35
October 2019	t1h1_1910	2019_10	trap_1	Height_1	1.67	4.9	14.6	20.61	28	32.1	64.08	89.6	16.24
October 2019	t1h2_1910	2019_10	trap_1	Height_2	1.67	4.9	14.6	20.61	28	32.1	64.08	89.6	16.24
October 2019	t1h3_1910	2019_10	trap_1	Height_3	1.67	4.9	14.6	20.61	28	32.1	64.08	89.6	16.24
October 2019	t2h1_1910	2019_10	trap_2	Height_1	1.67	4.9	14.6	20.61	28	32.1	64.08	89.6	16.24
October 2019	t2h2_1910	2019_10	trap_2	Height_2	1.67	4.9	14.6	20.61	28	32.1	64.08	89.6	16.24
October 2019	t2h3_1910	2019_10	trap_2	Height_3	1.67	4.9	14.6	20.61	28	32.1	64.08	89.6	16.24
October 2019	t3h1_1910	2019_10	trap_3	Height_1	1.67	4.9	14.6	20.61	28	32.1	64.08	89.6	16.24
October 2019	t3h2_1910	2019_10	trap_3	Height_2	1.67	4.9	14.6	20.61	28	32.1	64.08	89.6	16.24
October 2019	t3h3_1910	2019_10	trap_3	Height_3	1.67	4.9	14.6	20.61	28	32.1	64.08	89.6	16.24
November 2019	t1h1_1911	2019_11	trap_1	Height_1	1.54	5.1	1.6	5.29	11	65.1	84.31	91.2	4.65
November 2019	t1h2_1911	2019_11	trap_1	Height_2	1.54	5.1	1.6	5.29	11	65.1	84.31	91.2	4.65
November 2019	t1h3_1911	2019_11	trap_1	Height_3	1.54	5.1	1.6	5.29	11	65.1	84.31	91.2	4.65
November 2019	t2h1_1911	2019_11	trap_2	Height_1	1.54	5.1	1.6	5.29	11	65.1	84.31	91.2	4.65
November 2019	t2h2_1911	2019_11	trap_2	Height_2	1.54	5.1	1.6	5.29	11	65.1	84.31	91.2	4.65
November 2019	t2h3_1911	2019_11	trap_2	Height_3	1.54	5.1	1.6	5.29	11	65.1	84.31	91.2	4.65
November 2019	t3h1_1911	2019_11	trap_3	Height_1	1.54	5.1	1.6	5.29	11	65.1	84.31	91.2	4.65
November 2019	t3h2_1911	2019_11	trap_3	Height_2	1.54	5.1	1.6	5.29	11	65.1	84.31	91.2	4.65
November 2019	t3h3_1911	2019_11	trap_3	Height_3	1.54	5.1	1.6	5.29	11	65.1	84.31	91.2	4.65
December 2019	t1h1_1912	2019_12	trap_1	Height_1	2.08	5.1	1.6	5.29	11	65.1	84.31	91.2	4.65
December 2019	t1h2_1912	2019_12	trap_1	Height_2	2.08	5.1	1.6	5.29	11	65.1	84.31	91.2	4.65
December 2019	t1h3_1912	2019_12	trap_1	Height_3	2.08	5.1	1.6	5.29	11	65.1	84.31	91.2	4.65
December 2019	t2h1_1912	2019_12	trap_2	Height_1	2.08	5.1	1.6	5.29	11	65.1	84.31	91.2	4.65
December 2019	t2h2_1912	2019_12	trap_2	Height_2	2.08	5.1	1.6	5.29	11	65.1	84.31	91.2	4.65
December 2019	t2h3_1912	2019_12	trap_2	Height_3	2.08	5.1	1.6	5.29	11	65.1	84.31	91.2	4.65
December 2019	t3h1_1912	2019_12	trap_3	Height_1	2.08	5.1	1.6	5.29	11	65.1	84.31	91.2	4.65
December 2019	t3h2_1912	2019_12	trap_3	Height_2	2.08	5.1	1.6	5.29	11	65.1	84.31	91.2	4.65
December 2019	t3h3_1912	2019_12	trap_3	Height_3	2.08	5.1	1.6	5.29	11	65.1	84.31	91.2	4.65
January 2020	t1h1_2001	2020_01	trap_1	Height_1	1.86	6.8	-2.6	1.88	9.6	58.6	79.31	90.1	1.7
January 2020	t1h2_2001	2020_01	trap_1	Height_2	1.86	6.8	-2.6	1.88	9.6	58.6	79.31	90.1	1.7
January 2020	t1h3_2001	2020_01	trap_1	Height_3	1.86	6.8	-2.6	1.88	9.6	58.6	79.31	90.1	1.7
January 2020	t2h1_2001	2020_01	trap_2	Height_1	1.86	6.8	-2.6	1.88	9.6	58.6	79.31	90.1	1.7
January 2020	t2h2_2001	2020_01	trap_2	Height_2	1.86	6.8	-2.6	1.88	9.6	58.6	79.31	90.1	1.7
January 2020	t2h3_2001	2020_01	trap_2	Height_3	1.86	6.8	-2.6	1.88	9.6	58.6	79.31	90.1	1.7
January 2020	t3h1_2001	2020_01	trap_3	Height_1	1.86	6.8	-2.6	1.88	9.6	58.6	79.31	90.1	1.7
January 2020	t3h2_2001	2020_01	trap_3	Height_2	1.86	6.8	-2.6	1.88	9.6	58.6	79.31	90.1	1.7
January 2020	t3h3_2001	2020_01	trap_3	Height_3	1.86	6.8	-2.6	1.88	9.6	58.6	79.31	90.1	1.7
February 2020	t1h1_2002**	2020_02	trap_1	Height_1	4.02	10.8	1.4	7.28	13.6	38	63.51	87.7	1.49
February 2020	t1h2_2002	2020_02	trap_1	Height_2	4.02	10.8	1.4	7.28	13.6	38	63.51	87.7	1.49
February 2020	t1h3_2002	2020_02	trap_1	Height_3	4.02	10.8	1.4	7.28	13.6	38	63.51	87.7	1.49
February 2020	t2h1_2002	2020_02	trap_2	Height_1	4.02	10.8	1.4	7.28	13.6	38	63.51	87.7	1.49
February 2020	t2h2_2002	2020_02	trap_2	Height_2	4.02	10.8	1.4	7.28	13.6	38	63.51	87.7	1.49
February 2020	t2h3_2002	2020_02	trap_2	Height_3	4.02	10.8	1.4	7.28	13.6	38	63.51	87.7	1.49
February 2020	t3h1_2002	2020_02	trap_3	Height_1	4.02	10.8	1.4	7.28	13.6	38	63.51	87.7	1.49
February 2020	t3h2_2002	2020_02	trap_3	Height_2	4.02	10.8	1.4	7.28	13.6	38	63.51	87.7	1.49
** Samples removed from the analysis

## Sheet: Table_S2
Table S2.2 Summary of sampling occasions between March 2019 and February 2020.
Period	Start	End
2019 March	26.03.2019	02.04.2019
2019 April	23.04.2019	30.04.2019
2019 May	21.05.2019	28.05.2019
2019 June	18.06.2019	25.06.2019
2019 July	30.07.2019	06.08.2019
2019 August	27.08.2019	03.09.2019
2019 September	24.09.2019	01.10.2019
2019 October	22.10.2019	29.10.2019
2019 November	19.11.2019	26.11.2019
2019 December	17.12.2019	24.12.2019
2020 January	21.01.2020	28.01.2020
2020 February	18.02.2020	25.02.2020

## Sheet: Table_S3
Table S3.1 Taxonomic classification and number of reads per ASV at species level.
ASV_ID	phylum	class	order	family	genus	species	t1h1_1903	t1h2_1903	t1h3_1903	t2h1_1903	t2h2_1903	t2h3_1903	t3h1_1903	t3h2_1903	t3h3_1903	t1h1_1904	t1h2_1904	t1h3_1904	t2h1_1904	t2h2_1904	t2h3_1904**	t3h1_1904	t3h2_1904	t3h3_1904	t1h1_1905	t1h2_1905	t1h3_1905	t2h1_1905	t2h2_1905	t2h3_1905	t3h1_1905	t3h2_1905	t3h3_1905	t1h1_1906	t1h2_1906	t1h3_1906	t2h1_1906	t2h2_1906	t2h3_1906	t3h1_1906	t3h2_1906	t3h3_1906	t1h1_1907	t1h2_1907	t1h3_1907	t2h1_1907	t2h2_1907	t2h3_1907	t3h1_1907
ASV_1	Ascomycota	Dothideomycetes	Cladosporiales	Cladosporiaceae	Cladosporium	angustiherbarum	1277	3250	458	389	547	230	2810	1577	1282	472	998	367	1439	215	0	1398	1281	3975	1420	4606	10363	3967	0	837	1250	1180	0	2140	4726	4818	10516	12687	18184	9381	15645	16247	4861	0	0	0	12245	0	9131
ASV_2	Ascomycota	Dothideomycetes	Cladosporiales	Cladosporiaceae	Cladosporium	angustiherbarum	0	0	0	0	0	0	0	0	0	0	0	0	0	0	18	0	0	0	0	0	0	0	5900	0	0	0	3495	0	0	0	0	0	0	0	0	0	0	8365	10756	15868	0	18309	0
ASV_3	Ascomycota	Dothideomycetes	Pleosporales	Didymellaceae	Epicoccum	phragmospora	91	2333	1	123	1	37	0	1	0	759	369	5	61	2	0	1648	57	0	256	295	126	80	274	12	18	160	7	173	75	396	1009	214	7194	126	571	2814	284	364	0	304	447	0	210
ASV_4	Basidiomycota	Tremellomycetes	Cystofilobasidiales	Mrakiaceae	Itersonilia	perplexans	0	520	0	11	0	5	0	0	0	6	2	89	20	2	2	11	0	96	2	1	0	0	1	0	9	2	0	0	25	0	1	0	0	0	0	0	0	0	1	3	0	0	0
ASV_5	Ascomycota	Sordariomycetes	Hypocreales	Nectriaceae	Cosmospora	stegonsporii	0	0	0	0	0	0	25	0	0	85	0	8	0	63	0	0	0	0	0	0	0	0	0	0	0	0	0	0	0	0	0	1	0	0	0	0	0	0	0	3	0	0	0
ASV_6	Ascomycota	Dothideomycetes	Dothideales	Saccotheciaceae	Aureobasidium	leucospermi	5	65	0	7	63	19	56	0	0	281	428	479	615	165	0	1541	316	2434	260	530	1357	356	535	94	86	137	542	45	19	0	84	24	643	75	165	2957	23	0	0	62	33	5	0
ASV_7	Ascomycota	Leotiomycetes	Helotiales	Sclerotiniaceae	Botryotinia	ranunculi	7	1	0	6	0	3	6	0	0	405	180	89	472	41	0	3347	0	724	13916	2264	111	8404	943	22	8083	125	296	0	0	0	0	0	0	0	0	2	0	0	0	0	0	0	0
ASV_8	Ascomycota	Sordariomycetes	Xylariales	Xylariales_fam_Incertae_sedis	Cryptostroma	nummularia	14	0	0	5	0	16	0	0	0	37	22	0	9	52	0	57	54	108	36	3211	27	15	0	8	139	19	7	4327	6658	795	3160	2870	103	2142	1575	111	29	0	0	13	8	0	0
ASV_9	Ascomycota	Dothideomycetes	Pleosporales	Pleosporaceae	Alternaria	alstroemeriae	553	0	2101	3	48	0	26	0	251	335	65	9	39	14	0	40	828	137	28	314	529	133	0	245	59	21	0	46	21	34	102	59	351	134	373	113	391	0	0	0	1382	0	420
ASV_10	Basidiomycota	Agaricomycetes	Corticiales	Vuilleminiaceae	Vuilleminia	alni	903	724	0	107	5693	140	1901	1665	173	14	21	79	42	22	0	45	0	243	13	0	0	0	0	0	0	0	1	2	7	0	0	0	0	0	0	0	0	0	79	78	73	0	37
ASV_11	Basidiomycota	Tremellomycetes	Tremellales	Bulleribasidiaceae	Vishniacozyma	tephrensis	0	0	0	0	0	50	0	0	4	0	16	0	0	0	0	15	0	0	42	4	118	0	0	0	0	0	0	11	0	0	6	0	21	100	7	81	13	15	0	0	33	0	0
ASV_12	Basidiomycota	Agaricomycetes	Thelephorales	Thelephoraceae	Pseudotomentella	pseudochalastosporoides	206	900	0	8	201	0	34	0	151	89	27	39	262	43	0	153	1996	205	265	573	397	437	0	0	89	131	44	57	39	16	307	73	179	114	34	62	53	0	0	0	62	0	79
ASV_13	Ascomycota	Ascomycota_cls_Incertae_sedis	Ascomycota_ord_Incertae_sedis	Ascomycota_fam_Incertae_sedis	Ascomycota_gen_Incertae_sedis	cryptophialidica	38	761	0	20	77	50	175	500	32	81	39	23	34	25	0	173	44	198	6	80	436	33	24	0	21	702	24	7	23	0	197	69	0	0	0	70	0	0	1	8	0	0	0
ASV_14	Ascomycota	Dothideomycetes	Pleosporales	Didymellaceae	Epicoccum	phragmospora	0	0	0	0	0	0	0	0	0	0	0	0	0	0	0	0	0	0	0	0	0	0	0	0	0	0	0	0	0	1	0	4	0	0	0	0	28	0	0	0	0	0	0
ASV_15	Basidiomycota	Agaricomycetes	Thelephorales	Thelephoraceae	Pseudotomentella	chasmanthicola	148	0	0	14	292	14	59	0	0	13	60	13	52	0	0	134	1317	330	128	164	165	462	0	31	85	135	0	79	38	23	162	80	36	196	108	48	155	0	0	0	217	0	338
ASV_16	Ascomycota	Sordariomycetes	Hypocreales	Nectriaceae	Fusarium	tenuicristatum	0	0	0	0	0	0	0	0	0	0	0	0	25	0	0	0	0	0	0	0	0	0	0	0	0	0	0	0	0	0	0	0	0	0	3	0	0	0	0	4	0	0	0
ASV_17	Ascomycota	Dothideomycetes	Pleosporales	Pleosporaceae	Alternaria	dactylidicola	53	108	0	0	104	0	52	12	0	60	826	67	14	52	0	172	119	135	56	17	61	0	0	0	24	4	0	26	86	131	153	213	379	0	190	981	1002	0	0	0	1053	0	0
ASV_18	Basidiomycota	Tremellomycetes	Tremellales	Tremellaceae	Tremella	griseola	0	0	0	0	0	0	0	0	0	0	0	0	4	0	0	0	0	0	0	0	0	0	0	0	0	0	0	0	0	0	0	0	0	0	0	0	0	0	0	0	0	0	0
ASV_19	Ascomycota	Dothideomycetes	Pleosporales	Didymellaceae	Epicoccum	triodiae	0	0	0	0	0	1	10	0	0	186	20	29	22	12	0	807	179	14	14	38	121	9	1074	0	16	5523	0	38	0	0	0	2	0	29	11	36	16	62	0	0	0	0	16
ASV_20	Basidiomycota	Tremellomycetes	Tremellales	Bulleribasidiaceae	Vishniacozyma	tephrensis	0	0	0	0	0	2	0	0	0	6	0	0	11	0	0	15	92	91	12	11	0	10	0	0	0	2	0	0	0	1	6	4	31	2	56	50	56	13	0	0	18	4	22
ASV_21	Ascomycota	Dothideomycetes	Pleosporales	Pleosporaceae	Alternaria	alstroemeriae	0	0	0	0	0	0	0	0	0	0	0	0	0	0	1	0	0	0	0	0	0	0	213	0	0	0	77	0	0	0	0	0	0	0	0	0	0	651	1382	474	0	1808	0
ASV_22	Basidiomycota	Tremellomycetes	Tremellales	Bulleribasidiaceae	Vishniacozyma	victoriae	0	0	0	0	0	0	3	0	0	1	0	8	63	0	0	0	0	0	0	2	0	0	2	7	0	0	0	0	0	6	34	3	0	6	50	0	34	22	10	53	10	9	23
ASV_23	Basidiomycota	Agaricomycetes	Corticiales	Vuilleminiaceae	Vuilleminia	alni	264	1802	0	80	0	55	209	162	0	36	40	44	0	0	0	0	0	0	0	8	0	0	0	0	0	0	0	0	0	0	0	0	0	0	0	0	0	0	0	0	0	0	20
ASV_24	Ascomycota	Dothideomycetes	Pleosporales	Didymellaceae	Didymella	keratinophila	0	0	0	0	0	0	0	0	0	15	0	0	7	3	0	16	0	0	8	26	0	23	0	0	8	6012	0	0	8	8	0	0	0	0	8	56	0	0	0	0	0	0	6
ASV_25	Ascomycota	Dothideomycetes	Pleosporales	Pleosporaceae	Alternaria	ethzedia	0	0	0	0	0	0	0	0	0	0	0	0	0	0	0	0	0	0	0	0	0	9	50	0	0	0	37	0	0	0	0	0	0	168	0	0	0	466	1537	1576	0	2166	974
ASV_26	Basidiomycota	Tremellomycetes	Tremellales	Bulleribasidiaceae	Vishniacozyma	tephrensis	0	0	0	0	0	56	0	0	0	0	0	0	8	0	0	0	0	0	11	0	0	0	0	1	0	0	0	0	6	0	0	0	0	7	0	57	0	0	0	0	0	0	0
ASV_27	Ascomycota	Leotiomycetes	Erysiphales	Erysiphaceae	Blumeria	americana	0	0	0	0	57	0	56	0	14	92	132	211	61	83	1	304	0	1529	37	46	0	0	0	4	10	0	10	0	5	6	0	6	0	3	17	6	0	0	0	0	0	0	0
ASV_28	Ascomycota	Dothideomycetes	Cladosporiales	Cladosporiaceae	Cladosporium	pseudochalastosporoides	0	0	0	0	0	0	0	0	0	0	0	0	0	0	4	0	0	0	0	0	0	0	392	11	0	0	0	0	0	0	0	0	0	0	0	0	0	79	76	349	0	34	0
ASV_29	Ascomycota	Dothideomycetes	Pleosporales	Cucurbitariaceae	Cucurbitaria	oromediterranea	580	0	0	0	0	0	28	0	0	14	0	1	2	0	0	155	0	85	5291	0	3	0	0	0	0	2	76	0	0	0	3	0	0	0	0	0	0	0	0	0	3	0	0
ASV_30	Basidiomycota	Tremellomycetes	Filobasidiales	Filobasidiaceae	Filobasidium	wieringae	0	0	1	0	0	9	0	0	0	5	3	0	0	0	0	20	39	27	6	6	52	10	0	0	12	0	6	0	3	4	11	0	17	10	28	50	4	16	0	2	0	0	0
ASV_31	Ascomycota	Leotiomycetes	Helotiales	Sclerotiniaceae	Botryotinia	ranunculi	0	0	0	0	0	0	0	0	0	0	12	0	132	6	0	1259	25	0	1912	477	104	1476	260	14	1502	15	0	0	3	0	0	0	0	0	0	0	0	0	0	0	0	0	0
ASV_32	Ascomycota	Dothideomycetes	Pleosporales	Cucurbitariaceae	Seltsamia	ulmi	0	0	0	0	0	0	0	0	0	0	20	0	0	6372	0	1	0	0	16	2	0	0	0	0	0	0	0	0	0	0	0	0	0	0	0	0	0	0	0	0	0	0	0
ASV_33	Ascomycota	Dothideomycetes	Dothideomycetes_ord_Incertae_sedis	Dothideomycetes_fam_Incertae_sedis	Dothideomycetes_gen_Incertae_sedis	carotae	0	1	0	0	0	0	0	0	0	336	0	5021	0	30	0	328	0	160	1	62	52	0	41	0	0	4	0	0	0	10	0	0	0	0	0	0	0	0	0	0	0	0	0
ASV_34	Ascomycota	Dothideomycetes	Pleosporales	Didymosphaeriaceae	Pseudopithomyces	angolensis	0	0	0	0	0	0	0	109	0	0	0	51	0	0	0	34	0	1	0	0	0	0	0	0	0	0	59	0	0	0	0	0	188	16	0	0	0	5	0	6	5	0	0
ASV_35	Ascomycota	Lecanoromycetes	Umbilicariales	Umbilicariaceae	Umbilicaria	maculata	0	0	0	0	0	0	0	0	0	0	0	5	0	14	0	0	0	0	0	255	0	32	0	8	0	0	0	0	0	0	23	0	0	0	0	0	0	0	0	4	0	0	0
ASV_36	Ascomycota	Dothideomycetes	Cladosporiales	Cladosporiaceae	Cladosporium	chasmanthicola	0	0	0	0	0	0	0	0	0	0	0	0	0	0	0	0	0	0	0	0	0	0	185	0	0	0	40	0	0	0	0	0	0	0	0	0	0	285	209	642	0	357	0
ASV_37	Basidiomycota	Agaricomycetes	Polyporales	Fomitopsidaceae	Laetiporus	ailaoshanensis	0	0	0	0	0	0	0	0	0	59	0	18	17	67	0	0	0	0	16	0	0	0	0	0	0	0	0	0	8	0	0	0	0	0	0	0	3900	0	0	0	0	0	1
ASV_38	Ascomycota	Lecanoromycetes	Umbilicariales	Umbilicariaceae	Umbilicaria	maculata	0	0	0	0	0	961	37	0	0	0	0	0	0	0	0	0	0	0	0	0	0	0	0	0	0	0	254	0	0	0	0	0	0	0	0	0	0	0	0	0	0	0	0
ASV_39	Basidiomycota	Agaricomycetes	Agaricales	Physalacriaceae	Cylindrobasidium	asperior	0	2	0	4	0	0	34	0	0	12	3	0	0	0	0	7	1	0	0	0	0	0	0	0	0	0	0	0	0	0	0	0	0	1	0	0	0	0	0	1	0	0	0
ASV_40	Basidiomycota	Microbotryomycetes	Sporidiobolales	Sporidiobolaceae	Sporobolomyces	reniformis	0	1	0	0	0	0	0	0	0	1	1	0	0	3	0	0	0	0	0	0	0	0	0	0	0	1	0	8	9	0	0	7	9	2	100	12	146	16	20	20	26	34	49
ASV_41	Ascomycota	Dothideomycetes	Pleosporales	Pleosporaceae	Stemphylium	majusculum	0	0	0	0	0	0	0	0	0	0	0	0	9	0	0	0	0	40	12	28	233	0	0	22	16	17	24	5	37	28	13	18	361	4	22	0	11	0	0	0	45	0	0
ASV_42	Ascomycota	Dothideomycetes	Pleosporales	Amorosiaceae	Angustimassarina	acerina	3	0	0	0	0	0	0	0	0	0	15	15	0	0	0	0	0	0	0	1	0	0	0	0	0	0	0	0	16	0	0	0	0	1	0	0	0	0	3	0	0	0	0
ASV_43	Ascomycota	Sordariomycetes	Diaporthales	Diaporthales_fam_Incertae_sedis	Botryodiplodia	neojuniperi	65	0	0	0	0	0	0	0	0	5	5	0	1	0	0	4	342	205	0	0	0	0	0	0	0	9	0	0	12	0	0	0	0	2	1	0	0	0	0	0	0	0	0
ASV_44	Basidiomycota	Agaricomycetes	Russulales	Peniophoraceae	Peniophora	molesta	0	0	0	6	0	0	35	0	0	0	0	0	18	153	0	21	0	1130	0	0	0	0	0	0	0	0	0	0	0	0	0	0	0	0	4	0	0	0	9	331	115	0	272
ASV_45	Basidiomycota	Tremellomycetes	Tremellales	Rhynchogastremaceae	Papiliotrema	flavescens	0	0	0	0	0	8	0	0	0	0	0	0	11	0	0	45	31	0	12	122	0	12	1	0	37	98	0	5	1	0	0	0	0	27	21	391	0	0	0	0	0	0	0
ASV_46	Ascomycota	Leotiomycetes	Erysiphales	Erysiphaceae	Blumeria	hordei	43	0	0	4	0	0	38	0	0	19	0	21	0	7	0	34	0	249	7	10	0	0	5	0	13	0	0	0	1	0	0	0	0	0	0	0	0	0	0	0	0	0	0
ASV_47	Ascomycota	Eurotiomycetes	Chaetothyriales	Herpotrichiellaceae	Capronia	carceris	0	0	0	0	0	1394	0	0	0	12	0	8	11	3	0	14	0	5	6	0	40	0	0	0	0	0	0	0	0	3	0	0	0	0	12	3	0	0	0	0	0	0	0
ASV_48	Ascomycota	Dothideomycetes	Pleosporales	Didymellaceae	Epicoccum	triodiae	0	0	0	0	0	0	0	0	0	0	0	0	0	0	0	0	0	0	0	0	0	0	6	0	0	0	1	0	0	0	0	0	0	0	0	0	0	0	50	0	0	0	0
ASV_49	Basidiomycota	Agaricomycetes	Agaricales	Physalacriaceae	Armillaria	borealis	0	0	0	0	0	0	1	0	0	0	0	0	0	0	0	0	0	0	0	0	0	0	0	0	0	0	0	0	0	0	0	0	0	0	0	0	0	0	0	2	0	0	0
ASV_50	Ascomycota	Dothideomycetes	Cladosporiales	Cladosporiaceae	Cladosporium	angustiherbarum	0	0	0	0	0	0	0	0	0	0	0	29	0	17	0	0	0	0	24	0	777	0	0	0	0	0	0	0	85	0	255	0	130	151	106	140	91	0	0	0	92	0	125
ASV_51	Basidiomycota	Tremellomycetes	Cystofilobasidiales	Mrakiaceae	Phaffia	aurantiaca	0	0	0	0	0	0	0	0	0	0	0	0	0	0	0	0	0	0	0	0	0	0	0	0	0	0	0	0	0	0	423	0	0	0	0	0	0	0	0	0	0	0	0
ASV_52	Basidiomycota	Cystobasidiomycetes	NA	NA	NA	NA	0	0	0	0	0	2	0	0	0	0	0	0	0	0	0	15	0	0	0	0	0	0	0	4	0	7	0	0	4	0	8	0	0	0	0	25	0	0	0	2	0	0	0
ASV_53	Ascomycota	Dothideomycetes	Pleosporales	Didymosphaeriaceae	Kalmusia	longispora	0	0	0	0	0	0	0	0	0	0	0	0	0	14	0	3	0	50	0	0	0	0	0	0	0	3	0	0	0	0	0	0	0	1	0	0	0	0	0	0	0	0	0
ASV_54	Ascomycota	Dothideomycetes	Pleosporales	Pleosporaceae	Alternaria	dactylidicola	52	0	0	5	0	0	7	0	0	15	265	0	15	0	0	38	42	342	0	0	103	0	0	5	0	0	0	0	36	0	26	0	113	0	34	310	173	0	0	0	207	0	0
ASV_55	Basidiomycota	Tremellomycetes	Tremellales	Bulleribasidiaceae	Vishniacozyma	victoriae	0	0	0	0	0	0	14	0	0	3	0	18	0	0	0	0	0	0	0	7	0	0	0	0	0	0	0	16	0	1	12	0	0	7	0	0	11	0	0	17	0	23	0
ASV_56	Basidiomycota	Agaricomycetes	Corticiales	Vuilleminiaceae	Vuilleminia	alni	0	0	0	0	0	0	329	0	0	16	19	0	0	10	0	0	0	0	0	0	0	0	0	0	0	0	0	0	0	0	0	0	0	0	0	0	0	0	0	12	19	0	6
ASV_57	Ascomycota	Dothideomycetes	Dothideales	Saccotheciaceae	Aureobasidium	melanogenum	0	0	0	0	0	0	0	0	0	0	0	0	0	0	3	0	0	0	0	0	0	0	0	0	0	0	0	0	0	0	0	0	0	0	0	0	0	11	18	0	0	0	18
ASV_58	Ascomycota	Dothideomycetes	Pleosporales	Pleosporaceae	Stemphylium	majusculum	0	0	0	0	0	0	0	0	0	0	0	0	0	0	0	0	0	0	0	0	0	33	95	0	0	0	0	0	0	0	0	0	0	0	0	0	0	230	168	71	0	256	157
ASV_59	Basidiomycota	Tremellomycetes	Cystofilobasidiales	Mrakiaceae	Itersonilia	pannonica	0	0	0	0	0	0	0	0	0	7	0	22	0	0	0	12	0	0	0	0	0	0	0	0	3	0	1	0	0	0	8	8	0	0	0	0	4	0	0	0	0	0	0
ASV_60	Basidiomycota	Tremellomycetes	Tremellales	Bulleribasidiaceae	Vishniacozyma	victoriae	0	0	0	0	0	1	0	0	0	0	7	0	0	0	0	0	0	0	0	0	0	9	3	0	0	0	0	0	13	0	0	10	0	0	6	0	0	0	0	14	0	0	0
ASV_61	Ascomycota	Eurotiomycetes	Chaetothyriales	Trichomeriaceae	Knufia	cryptophialidica	0	0	0	0	0	0	26	0	0	0	0	0	0	0	0	0	0	0	0	0	56	0	0	0	0	2186	0	0	0	0	0	0	0	0	0	0	0	0	0	0	0	0	0
ASV_62	Ascomycota	Sordariomycetes	Xylariales	Apiosporaceae	Nigrospora	zimmermanii	0	1	0	0	0	0	0	0	0	0	0	0	0	0	0	0	0	841	0	0	0	0	0	0	0	0	0	0	0	0	0	0	0	0	0	0	27	0	0	0	8	0	6
ASV_63	NA	NA	NA	NA	NA	NA	47	0	0	0	0	0	0	0	0	0	0	0	0	0	0	0	0	0	0	0	0	0	0	0	0	0	0	0	0	0	0	0	0	0	0	0	0	0	0	0	0	0	0
ASV_64	Ascomycota	Dothideomycetes	Dothideomycetes_ord_Incertae_sedis	Dothideomycetes_fam_Incertae_sedis	Dothideomycetes_gen_Incertae_sedis	tenebrio	151	0	0	0	0	61	0	0	0	9	0	0	6	28	0	27	0	0	0	19	0	1	0	0	0	3	0	0	0	0	0	0	26	0	0	41	0	0	0	0	0	0	0
ASV_65	Ascomycota	Lecanoromycetes	Lecanorales	Ramalinaceae	Bacidina	terricola	0	0	0	0	0	2140	0	0	0	0	0	0	0	0	0	0	0	0	0	0	0	0	2	0	0	0	0	0	0	0	0	0	0	0	0	0	0	0	0	0	0	0	0
ASV_67	Ascomycota	Leotiomycetes	Helotiales	Sclerotiniaceae	Botryotinia	ranunculi	0	0	0	11	0	0	0	29	0	0	15	0	26	0	0	107	0	0	65	274	62	116	27	0	148	11	24	0	0	0	8	1	0	5	0	0	0	0	0	15	0	2	0
ASV_68	Basidiomycota	Tremellomycetes	Tremellales	Cryptococcaceae	Cryptococcus	tibetensis	0	0	0	0	0	0	0	0	0	0	0	0	0	0	0	4	0	0	7	0	0	22	9	0	0	15	0	0	0	3	21	0	0	25	12	206	0	0	0	0	0	0	0
ASV_69	Basidiomycota	Tremellomycetes	Tremellales	Cryptococcaceae	Kwoniella	shivajii	0	0	0	0	0	1	0	0	0	9	0	0	0	0	0	544	0	0	0	9	0	0	0	0	0	6	0	0	0	0	0	0	0	6	0	61	0	0	0	0	0	0	0
ASV_70	Basidiomycota	Tremellomycetes	Cystofilobasidiales	Mrakiaceae	Tausonia	pamirica	24	0	0	0	96	0	0	0	318	38	0	0	0	1	0	11	80	7	4	8	0	14	0	0	21	0	0	2	0	0	0	0	0	0	34	0	0	0	0	0	0	0	0
ASV_71	Ascomycota	Eurotiomycetes	Eurotiales	Aspergillaceae	Aspergillus	brunneus	0	0	0	0	0	0	0	0	0	0	0	0	0	0	0	0	0	18	0	0	0	8	2	0	0	0	0	0	0	0	0	0	0	0	0	0	0	0	0	0	0	0	0
ASV_72	Basidiomycota	Tremellomycetes	Tremellales	Bulleribasidiaceae	Dioszegia	hungarica	0	0	0	0	0	1	0	0	0	8	8	42	8	5	0	9	0	7	1	0	0	0	0	0	0	0	0	0	4	0	0	1	0	4	30	12	37	11	0	0	0	0	3
ASV_73	Ascomycota	Lecanoromycetes	Caliciales	Physciaceae	Physcia	occidentalis	0	0	0	0	0	0	0	0	0	0	0	0	0	0	0	0	0	0	0	0	0	0	0	0	0	0	0	0	0	0	0	13	0	0	0	0	0	0	0	0	0	0	0
ASV_74	Ascomycota	Dothideomycetes	Pleosporales	Didymellaceae	Neoascochyta	dactylidis	0	0	0	21	0	0	0	0	0	94	0	0	0	0	0	0	0	0	0	4	68	0	0	0	0	0	9	2	0	0	39	0	0	32	49	0	13	0	9	61	0	0	23
ASV_75	Ascomycota	Candelariomycetes	Candelariales	Candelariaceae	Candelariella	pacifica	0	0	0	0	0	0	0	0	0	0	0	0	5	0	0	0	0	0	0	0	0	0	0	0	0	0	0	0	0	0	0	0	0	0	0	0	0	0	0	0	0	0	0
ASV_76	Ascomycota	Dothideomycetes	Dothideales	Saccotheciaceae	Aureobasidium	leucospermi	0	0	0	0	0	0	0	0	0	0	31	0	132	0	0	92	25	598	13	0	51	31	32	14	0	19	80	0	0	0	8	0	0	0	0	194	0	0	0	0	0	0	0
ASV_77	Ascomycota	Dothideomycetes	Dothideales	Saccotheciaceae	Aureobasidium	leucospermi	0	0	0	0	0	0	0	0	0	11	43	0	0	0	0	0	0	0	0	0	217	0	0	0	0	0	0	0	0	0	0	0	0	0	0	0	0	0	0	0	0	0	0
ASV_78	Ascomycota	Dothideomycetes	Mycosphaerellales	Teratosphaeriaceae	Teratosphaeriaceae_gen_Incertae_sedis	madagascariense	0	1	0	0	0	441	0	0	263	2	23	0	15	0	0	0	0	151	4	20	0	0	0	0	0	5	0	0	0	1	7	11	0	0	7	0	0	0	0	0	0	0	0
ASV_79	Ascomycota	Dothideomycetes	Pleosporales	Amorosiaceae	Angustimassarina	acerina	0	0	0	0	0	0	37	0	0	18	17	0	11	0	0	17	0	0	0	0	0	0	0	0	9	0	0	0	0	0	0	0	0	0	0	0	0	0	0	12	0	0	3
ASV_80	Basidiomycota	Agaricomycetes	Thelephorales	Thelephoraceae	Pseudotomentella	puyae	0	0	0	0	0	0	8	0	0	0	0	2	0	3	0	1	0	0	0	0	0	0	0	5	0	2	0	11	1	0	0	8	44	0	32	0	0	0	0	0	9	0	0
ASV_82	Ascomycota	Dothideomycetes	Capnodiales	Capnodiales_fam_Incertae_sedis	Capnodiales_gen_Incertae_sedis	proteae	0	0	0	0	0	0	0	52	0	37	3	0	29	7	0	0	0	34	46	32	0	0	0	0	0	0	0	0	0	7	0	1	0	0	0	0	0	0	0	0	0	0	0
ASV_83	Basidiomycota	Agaricomycetes	Thelephorales	Thelephoraceae	Pseudotomentella	aggregatocicatricatum	38	0	0	0	0	0	0	0	0	4	0	0	2	0	0	0	0	67	2	36	0	0	0	0	11	3	22	0	11	5	30	40	103	56	42	83	6	0	0	0	140	0	34
ASV_84	Ascomycota	Dothideomycetes	Mycosphaerellales	Mycosphaerellaceae	Ramularia	vizellae	0	0	0	0	0	0	0	0	0	33	0	4	9	3	0	9	0	0	0	0	0	0	0	0	0	0	0	0	0	0	0	0	0	0	0	0	0	0	0	1	0	0	0
ASV_85	Basidiomycota	Agaricomycetes	Agaricomycetes_ord_Incertae_sedis	Agaricomycetes_fam_Incertae_sedis	Agaricomycetes_gen_Incertae_sedis	serpens	0	0	0	0	0	0	0	0	0	0	0	0	0	0	0	0	0	0	0	0	0	0	0	0	0	0	0	0	2	0	0	0	0	0	0	0	0	0	0	0	0	0	0
ASV_86	Ascomycota	Dothideomycetes	Pleosporales	Pleosporaceae	Alternaria	conjuncta	0	0	0	0	0	0	0	0	0	0	0	0	0	0	0	0	0	0	0	0	0	0	17	0	0	0	0	0	0	26	0	15	0	0	0	0	0	107	145	398	0	514	195
ASV_87	Ascomycota	Leotiomycetes	Helotiales	Discinellaceae	Pseudopezicula	betulae	0	0	0	0	0	0	8	0	0	158	19	0	233	9	0	170	0	0	69	7	0	60	0	0	133	0	0	0	0	0	0	0	0	0	0	0	0	0	0	0	0	0	0
ASV_89	Ascomycota	Dothideomycetes	Pleosporales	Didymellaceae	Didymella	rosea	0	0	0	0	0	0	0	0	0	20	0	0	0	0	0	36	0	0	0	0	0	0	0	0	0	458	0	0	4	11	0	0	0	0	0	0	0	0	0	0	0	0	0
ASV_90	Basidiomycota	Tremellomycetes	Tremellales	Tremellaceae	Tremella	subalpina	0	0	0	0	0	0	0	0	0	0	51	0	37	0	0	0	0	0	0	0	0	0	0	0	0	101	0	0	0	0	0	3	0	0	0	0	0	0	0	0	0	0	0
ASV_91	Ascomycota	Dothideomycetes	Pleosporales	Pleosporaceae	Alternaria	dactylidicola	20	0	0	0	0	0	0	0	0	0	84	0	7	0	0	6	0	371	0	0	47	8	0	0	0	0	0	0	19	8	16	8	0	4	61	211	66	0	0	0	21	0	55
ASV_92	Basidiomycota	Tremellomycetes	Tremellales	Bulleribasidiaceae	Vishniacozyma	tephrensis	0	0	0	0	0	0	0	0	0	0	0	0	0	0	0	0	0	0	0	0	0	0	0	0	0	0	16	0	0	0	12	0	34	0	0	0	0	0	0	0	0	0	0
ASV_93	Ascomycota	Eurotiomycetes	Chaetothyriales	Herpotrichiellaceae	Cladophialophora	behniae	0	0	12	0	0	1051	0	0	0	7	0	7	25	5	0	6	0	0	1	6	6	0	7	0	0	0	0	0	0	0	0	0	2	0	0	23	0	0	0	0	0	0	0
ASV_94	Ascomycota	Dothideomycetes	Pleosporales	Dictyosporiaceae	Verrucoccum	spribillei	0	0	0	0	0	1526	0	0	0	0	0	0	0	23	0	0	0	0	0	0	0	0	0	0	0	0	0	0	0	0	0	0	0	0	0	0	0	0	0	0	0	0	0
ASV_95	Ascomycota	Lecanoromycetes	Umbilicariales	Umbilicariaceae	Umbilicaria	maculata	0	0	0	0	0	0	0	0	0	24	0	0	0	0	0	0	0	0	0	0	0	0	0	0	0	0	0	0	0	0	0	0	0	0	0	0	0	0	0	0	0	0	0
ASV_96	Ascomycota	Lecanoromycetes	Lecanorales	Lecanoraceae	Lecanoraceae_gen_Incertae_sedis	anakeestiicola	0	0	0	0	0	0	0	0	0	0	4	0	10	1349	0	0	0	0	0	0	0	0	0	0	0	0	0	0	0	0	0	0	0	0	0	0	0	0	0	0	0	0	0
ASV_97	Basidiomycota	Agaricomycetes	Boletales	Boletaceae	Crocinoboletus	pinetorum	0	0	0	0	0	0	0	0	0	0	1	0	0	0	0	0	0	0	0	0	0	0	0	0	0	0	0	58	0	19	33	11	0	226	0	0	36	87	33	563	0	0	352
ASV_99	Basidiomycota	Tremellomycetes	Tremellales	Bulleribasidiaceae	Vishniacozyma	melezitolytica	0	0	0	1	0	0	0	0	0	0	0	0	0	0	0	0	0	0	0	0	0	0	0	0	0	128	0	0	0	0	0	0	0	0	17	0	0	0	0	0	0	0	0
ASV_100	Ascomycota	Dothideomycetes	Mycosphaerellales	Mycosphaerellaceae	Mycocentrospora	carotae	0	0	0	0	0	0	0	0	0	182	67	1000	0	0	0	72	0	0	0	0	0	0	0	0	0	11	0	0	0	0	0	0	0	0	0	0	0	0	23	0	0	0	0
ASV_101	Ascomycota	Dothideomycetes	Pleosporales	Didymellaceae	Epicoccum	phragmospora	0	23	0	0	0	0	0	0	0	0	0	0	0	0	0	0	0	0	0	0	0	0	0	0	0	0	0	0	0	0	28	0	180	0	17	92	0	0	0	0	0	0	0
ASV_102	Ascomycota	Dothideomycetes	Pleosporales	Cucurbitariaceae	Parafenestella	tetratrupha	0	0	0	0	0	0	0	0	0	0	0	0	0	0	0	0	30	0	0	0	0	0	0	0	0	0	0	0	0	0	0	0	0	0	0	0	0	0	0	0	0	0	0
ASV_104	Basidiomycota	Tremellomycetes	Tremellales	Bulleribasidiaceae	Vishniacozyma	europaea	0	0	0	0	0	0	0	0	0	0	0	0	10	0	0	5	0	0	0	0	0	0	0	0	0	0	0	0	0	0	0	0	0	0	0	0	1	0	0	4	0	0	0
ASV_105	Basidiomycota	Agaricomycetes	Thelephorales	Thelephoraceae	Pseudotomentella	pseudochalastosporoides	0	0	0	0	0	15	8	0	0	0	15	0	94	0	0	12	40	58	4	0	0	31	0	6	0	0	0	4	0	0	0	0	0	0	4	0	0	0	0	0	5	0	0
ASV_106	Basidiomycota	Agaricomycetes	Agaricales	Physalacriaceae	Armillaria	borealis	0	0	0	0	0	0	0	0	0	0	0	0	0	0	0	0	0	0	0	0	0	0	0	0	0	0	0	0	0	0	0	1	0	0	0	0	0	0	0	0	0	0	0
ASV_107	Basidiomycota	Cystobasidiomycetes	NA	NA	NA	NA	0	0	0	0	0	0	0	0	0	0	0	0	0	0	0	0	0	0	3	0	0	0	0	7	1	16	4	0	0	0	0	0	0	6	22	30	0	0	0	0	0	0	0
ASV_108	Ascomycota	Leotiomycetes	Leotiomycetes_ord_Incertae_sedis	Leotiomycetes_fam_Incertae_sedis	Leotiomycetes_gen_Incertae_sedis	serratus	0	0	0	0	0	0	0	0	0	1237	0	0	0	0	0	0	0	0	0	0	0	0	0	0	0	0	0	0	0	0	0	0	0	0	0	0	0	0	0	0	0	0	0
ASV_110	Ascomycota	Sordariomycetes	Hypocreales	Nectriaceae	Thyronectria	lamyi	0	0	501	0	0	0	0	0	0	0	577	0	0	23	0	0	0	0	0	0	0	0	0	0	0	0	0	0	0	0	0	0	0	0	0	0	0	0	0	0	0	0	0
ASV_111	Ascomycota	Leotiomycetes	Erysiphales	Erysiphaceae	Erysiphe	aucubae	0	0	0	0	0	0	0	0	0	0	0	0	0	0	0	0	0	0	0	0	0	0	0	0	2	0	0	0	35	117	25	24	85	57	38	54	0	0	0	0	0	0	0
ASV_112	Basidiomycota	Tremellomycetes	Tremellales	Rhynchogastremaceae	Papiliotrema	bandonii	0	0	0	0	0	0	0	0	0	0	0	0	0	0	0	0	0	0	0	0	0	0	0	0	0	0	0	0	0	0	0	0	0	0	0	0	0	0	0	0	0	0	12
ASV_113	Ascomycota	Lecanoromycetes	Lecanorales	Scoliciosporaceae	Scoliciosporum	anakeestiicola	0	17	0	0	83	7	0	0	0	27	0	4	6	44	0	42	13	2	0	0	0	0	1	0	0	0	0	0	0	0	0	0	0	0	0	0	2	0	0	0	0	0	0
ASV_114	Ascomycota	Lecanoromycetes	Caliciales	Physciaceae	Physcia	rhizinata	0	0	0	0	0	0	0	0	0	0	0	4	0	0	0	0	0	0	0	129	0	23	0	0	0	403	0	0	0	0	0	4	0	0	0	0	0	0	0	0	0	0	0
ASV_115	Basidiomycota	Tremellomycetes	Tremellales	Bulleraceae	Pseudotremella	moriformis	0	0	0	0	0	0	0	0	0	0	0	0	0	0	0	0	0	0	0	0	0	0	0	0	0	0	0	0	0	0	0	0	0	0	0	0	0	0	0	0	0	0	0
ASV_116	Ascomycota	Sordariomycetes	Sordariales	Sordariaceae	Gelasinospora	brevispora	0	0	0	0	0	0	0	0	0	0	0	0	0	0	0	0	0	0	0	0	0	0	0	0	0	0	0	0	0	0	0	0	0	0	0	0	0	0	0	0	0	0	0
ASV_117	Ascomycota	Dothideomycetes	Pleosporales	Pleosporaceae	Alternaria	dactylidicola	0	0	0	0	0	0	0	19	0	18	18	0	0	0	0	28	0	51	0	0	23	0	0	0	0	0	0	0	0	0	15	0	28	0	32	120	88	0	61	0	114	0	54
ASV_118	Fungi_phy_Incertae_sedis	Fungi_cls_Incertae_sedis	Fungi_ord_Incertae_sedis	Fungi_fam_Incertae_sedis	Fungi_gen_Incertae_sedis	Fungi_sp_incertae_sedi	0	0	0	0	0	0	0	0	0	8	0	0	11	0	0	14	0	0	9	14	0	0	13	2	0	187	0	146	0	0	3	0	0	0	0	0	0	0	0	0	0	0	0
ASV_119	Ascomycota	Dothideomycetes	Capnodiales	Capnodiales_fam_Incertae_sedis	Capnodiales_gen_Incertae_sedis	proteae	0	0	0	7	0	0	0	0	0	0	8	5	4	23	0	0	0	0	0	14	12	0	9	0	3	0	0	0	0	5	0	0	0	0	0	0	0	0	0	0	0	0	0
ASV_120	Basidiomycota	Tremellomycetes	Tremellales	Rhynchogastremataceae	Papiliotrema	wisconsinensis	0	0	0	0	0	0	20	0	0	20	0	0	2	0	0	25	0	0	6	16	0	0	3	0	0	0	0	27	0	0	0	2	0	0	0	0	0	0	0	0	0	0	4
ASV_121	Ascomycota	Dothideomycetes	Mycosphaerellales	Mycosphaerellaceae	Zymoseptoria	tritici	0	0	0	0	0	0	0	0	0	0	0	0	0	0	0	0	0	69	0	0	0	0	0	0	0	0	0	0	0	0	0	0	0	0	0	0	0	0	0	0	17	10	0
ASV_122	Basidiomycota	Tremellomycetes	Tremellales	Bulleribasidiaceae	Vishniacozyma	tephrensis	0	0	0	0	0	0	0	0	0	0	0	0	0	0	0	0	0	12	0	0	0	0	0	0	0	0	0	0	6	0	0	0	0	0	0	0	14	0	0	0	0	0	0
ASV_123	Ascomycota	Dothideomycetes	Capnodiales	Capnodiales_fam_Incertae_sedis	Arthrocatena	tenebrio	0	0	0	0	0	0	0	0	0	0	0	0	7	7	0	0	0	0	6	0	1090	0	0	0	0	0	0	0	0	0	0	0	0	0	0	0	0	0	0	0	0	0	0
ASV_125	Basidiomycota	Agaricomycetes	Agaricales	Physalacriaceae	Armillaria	borealis	0	0	0	0	0	0	0	0	0	0	0	0	0	0	0	0	0	0	0	0	0	0	0	0	0	0	0	0	0	0	0	0	0	0	0	0	0	0	0	0	0	0	0
ASV_126	Ascomycota	Orbiliomycetes	Orbiliales	Orbiliales_fam_Incertae_sedis	Orbiliales_gen_Incertae_sedis	revayae	0	0	0	0	0	0	0	0	0	7	12	0	0	0	0	0	0	0	0	0	0	0	0	0	1	0	0	0	0	0	38	0	0	0	0	0	0	0	0	0	0	0	0
ASV_127	Ascomycota	Eurotiomycetes	Eurotiales	Aspergillaceae	Aspergillus	heterocaryoticus	0	0	0	0	0	0	0	0	0	16	0	0	0	10	0	0	0	0	0	0	0	0	0	0	0	0	0	0	0	0	0	0	0	0	0	0	0	0	0	11	0	0	0
ASV_128	Ascomycota	Dothideomycetes	Pleosporales	Didymellaceae	Neoascochyta	dactylidis	0	0	0	0	0	0	0	0	0	55	0	0	11	4	0	15	0	68	0	56	0	0	18	7	0	16	0	0	4	0	32	22	0	7	25	0	47	0	0	76	44	9	35
ASV_129	Basidiomycota	Tremellomycetes	Tremellales	Tremellaceae	Tremella	subalpina	0	0	0	0	0	0	0	0	0	33	0	0	0	0	0	0	0	0	0	0	0	0	1	0	0	0	0	0	0	0	0	4	0	0	0	0	0	0	0	0	0	0	0
ASV_130	Ascomycota	Dothideomycetes	Mycosphaerellales	Mycosphaerellaceae	Ramulariopsis	pseudoglycines	38	0	0	0	0	0	0	0	0	0	0	0	8	103	0	0	0	0	0	79	0	0	0	0	0	0	0	0	0	0	0	0	0	0	0	0	0	0	0	0	0	0	0
ASV_131	Basidiomycota	Agaricomycetes	Agaricales	Physalacriaceae	Armillaria	borealis	0	0	0	0	0	0	0	0	0	0	0	0	0	0	0	0	0	0	0	0	0	0	0	0	0	0	0	0	0	0	0	0	0	0	0	0	0	0	0	0	0	0	0
ASV_132	Ascomycota	Candelariomycetes	Candelariales	Candelariaceae	Candelariella	pacifica	0	0	0	0	0	0	0	0	0	0	0	0	0	0	0	0	0	0	0	0	0	6	0	0	0	0	0	0	0	0	0	0	0	0	0	0	0	0	0	0	0	0	0
ASV_133	NA	NA	NA	NA	NA	NA	0	0	0	0	0	0	0	0	0	0	0	0	0	0	0	983	0	0	0	0	0	0	0	0	0	6	0	0	0	0	5	0	0	0	0	0	0	0	0	0	0	0	0
ASV_134	Ascomycota	Sordariomycetes	Xylariales	Xylariales_fam_Incertae_sedis	Cryptostroma	nummularia	0	0	0	0	0	0	0	0	0	0	0	0	0	0	0	3	0	0	0	91	0	0	0	0	8	0	0	117	188	16	93	77	0	55	49	0	0	0	0	0	0	0	0
ASV_135	Ascomycota	Dothideomycetes	Mycosphaerellales	Neodevriesiaceae	Neodevriesia	fraserae	0	0	0	0	0	0	0	0	0	7	0	0	0	0	0	0	0	97	9	31	0	0	4	0	3	0	0	0	0	10	0	0	0	0	0	3	0	0	0	0	0	0	0
ASV_136	Ascomycota	Dothideomycetes	Pleosporales	Pleosporaceae	Alternaria	ethzedia	0	0	0	0	0	0	0	0	0	0	0	0	0	0	0	0	0	0	0	0	0	0	0	0	0	0	1	8	0	0	0	0	0	0	0	0	0	33	207	115	0	407	0
ASV_137	Ascomycota	Dothideomycetes	Mycosphaerellales	Neodevriesiaceae	Neodevriesia	fraserae	0	0	0	0	0	0	0	0	0	0	0	0	3	0	0	0	0	0	0	0	0	0	0	0	0	0	0	0	0	0	0	0	0	0	0	0	0	0	0	0	0	0	0
ASV_138	Basidiomycota	Agaricomycetes	Agaricales	Physalacriaceae	Armillaria	borealis	0	0	0	0	0	0	0	0	0	0	0	0	0	0	0	0	0	0	0	0	0	0	0	0	0	0	0	0	0	0	0	0	0	0	0	0	0	0	0	0	0	0	0
ASV_141	Basidiomycota	Agaricomycetes	Corticiales	Vuilleminiaceae	Vuilleminia	alni	0	0	0	0	0	0	0	0	0	0	114	0	0	0	0	0	0	0	0	0	0	0	0	0	0	0	0	0	0	0	0	0	0	0	0	0	0	0	0	0	0	0	0
ASV_142	Ascomycota	Dothideomycetes	Pleosporales	Cucurbitariaceae	Neocucurbitaria	vachelliae	0	0	0	0	0	0	0	0	0	6	17	0	0	7	0	0	0	231	0	0	0	0	0	0	0	0	0	0	0	0	5	0	0	0	12	0	0	0	0	0	0	0	0
ASV_143	Basidiomycota	Agaricomycetes	Polyporales	Polyporaceae	Coriolopsis	hainanensis	1	0	0	0	0	0	0	0	0	10	0	0	0	0	0	0	0	0	56	0	0	0	3	0	28	0	0	0	0	0	0	0	0	19	18	0	16	0	0	169	11	0	187
ASV_144	Basidiomycota	Tremellomycetes	Tremellales	Bulleribasidiaceae	Dioszegia	antarctica	0	0	0	0	0	0	0	0	0	6	0	0	1	0	0	9	0	0	0	0	0	0	0	0	0	0	0	0	2	0	0	0	0	2	0	19	7	0	0	0	0	0	0
ASV_146	Basidiomycota	Tremellomycetes	Tremellales	Cryptococcaceae	Teunia	korlaensis	0	0	0	0	0	0	0	0	0	16	0	0	0	0	0	0	0	0	0	0	0	0	0	0	0	0	0	0	0	0	0	0	0	0	0	0	0	0	0	0	0	0	0
ASV_148	Ascomycota	Taphrinomycetes	Taphrinales	Taphrinaceae	Taphrina	carpini	0	0	0	0	0	0	0	0	0	0	3	0	0	0	0	7	0	0	0	0	0	0	0	0	0	0	0	0	0	0	0	0	0	0	0	0	0	0	0	0	0	0	0
ASV_149	Ascomycota	Dothideomycetes	Cladosporiales	Cladosporiaceae	Cladosporium	puyae	0	0	0	0	0	0	0	0	0	0	0	0	0	0	0	0	0	0	0	0	0	0	0	0	0	0	0	0	0	0	0	0	0	0	0	0	0	0	0	16	0	0	10
ASV_150	Ascomycota	Saccharomycetes	Saccharomycetales	Dipodascaceae	Galactomyces	pseudocandidus	0	0	0	0	0	0	0	0	0	0	0	0	0	0	0	0	0	0	0	0	0	0	0	0	0	0	0	0	0	0	0	0	0	0	0	0	0	0	0	0	0	0	0
ASV_151	Ascomycota	Dothideomycetes	Cladosporiales	Cladosporiaceae	Cladosporium	aggregatocicatricatum	0	0	0	0	0	0	0	0	0	0	0	0	0	0	0	0	0	0	0	0	0	0	20	0	0	0	0	5	0	0	0	0	0	0	0	0	0	52	122	152	0	109	0
ASV_152	Ascomycota	Ascomycota_cls_Incertae_sedis	Ascomycota_ord_Incertae_sedis	Ascomycota_fam_Incertae_sedis	Ascomycota_gen_Incertae_sedis	aquaticus	0	0	0	0	0	0	0	0	0	0	0	0	0	0	0	0	50	0	5	78	0	0	0	0	0	0	0	0	0	0	0	0	0	0	0	0	0	0	0	0	0	0	0
ASV_153	Basidiomycota	Agaricomycetes	Cantharellales	Cantharellales_fam_Incertae_sedis	Cantharellales_gen_Incertae_sedis	dingjieense	0	0	0	0	0	0	0	0	0	0	0	0	0	0	0	0	0	0	0	0	0	0	0	0	0	0	0	0	0	0	0	0	0	0	0	0	0	0	0	0	0	0	0
ASV_154	Basidiomycota	Agaricomycetes	Polyporales	Polyporaceae	Trametes	versicolor	0	0	0	0	0	0	0	0	0	0	0	0	2	0	0	0	0	11	0	0	0	0	0	0	0	0	0	0	0	0	0	0	0	0	0	0	0	0	0	0	0	0	0
ASV_155	Basidiomycota	Tremellomycetes	Tremellales	Bulleribasidiaceae	Vishniacozyma	tephrensis	0	0	0	0	0	0	0	0	0	0	0	0	0	0	0	0	0	0	0	0	0	0	0	0	0	0	0	0	0	0	0	0	0	0	0	0	91	0	0	0	0	0	14
ASV_156	Basidiomycota	Agaricomycetes	Polyporales	Fomitopsidaceae	Laetiporus	ailaoshanensis	0	0	0	0	0	0	0	0	0	0	0	0	31	0	0	0	0	0	0	8	0	0	0	0	0	0	0	143	0	0	0	0	0	0	0	0	0	0	0	0	0	0	0
ASV_157	Ascomycota	Dothideomycetes	Mycosphaerellales	Teratosphaeriaceae	Penidiella	ellipsoidea	0	557	0	0	0	0	0	0	0	0	0	0	0	0	0	4	0	0	0	0	0	0	0	0	0	0	0	0	0	0	0	0	0	0	0	0	0	0	0	0	0	0	0
ASV_158	Ascomycota	Dothideomycetes	Mycosphaerellales	Neodevriesiaceae	Neodevriesia	fraserae	0	0	0	0	0	0	0	0	0	16	0	14	0	42	0	20	64	0	0	0	0	0	0	0	0	0	0	13	0	0	0	0	0	0	0	0	0	0	0	0	0	0	0
ASV_160	Ascomycota	Ascomycota_cls_Incertae_sedis	Ascomycota_ord_Incertae_sedis	Ascomycota_fam_Incertae_sedis	Ascomycota_gen_Incertae_sedis	vachelliae	0	0	0	0	0	436	0	0	0	0	0	0	0	0	0	0	0	0	0	0	0	0	0	0	0	0	0	0	0	0	0	0	0	0	0	0	0	0	0	0	0	0	0
ASV_162	Ascomycota	Dothideomycetes	Mycosphaerellales	Teratosphaeriaceae	Neophaeothecoidea	proteae	0	0	0	0	0	26	0	30	0	7	14	0	4	0	0	0	0	0	4	15	0	0	0	0	0	0	5	0	0	0	0	0	0	11	0	0	0	0	0	0	0	0	0
ASV_163	Ascomycota	Dothideomycetes	Pleosporales	Cucurbitariaceae	Neocucurbitaria	vachelliae	0	0	0	4	0	0	0	0	0	6	6	57	0	0	0	0	0	0	0	6	0	0	0	0	0	11	0	0	0	0	0	0	0	0	0	0	0	0	0	0	0	0	0
ASV_164	Basidiomycota	Tremellomycetes	Tremellales	Tremellales_fam_Incertae_sedis	Tremellales_gen_Incertae_sedis	murrhardtense	0	0	0	0	0	0	0	0	0	0	0	0	0	0	0	0	0	0	0	113	0	0	2	0	0	0	0	0	0	16	0	0	0	0	0	0	0	0	0	0	0	0	0
ASV_166	Ascomycota	Dothideomycetes	Pleosporales	Pleosporaceae	Alternaria	rosae	0	0	0	0	0	0	0	0	0	13	0	0	0	0	0	0	0	0	0	0	0	5	0	0	6	0	0	0	0	0	1	0	0	0	0	71	14	0	0	0	22	0	6
ASV_167	Ascomycota	Dothideomycetes	Mycosphaerellales	Mycosphaerellaceae	Cercosporella	dolichandrae	0	0	0	0	475	0	26	0	0	0	0	0	0	2	0	21	0	0	0	0	0	0	0	0	0	9	0	0	0	0	0	0	0	0	0	0	0	0	0	0	0	0	0
ASV_168	Basidiomycota	Agaricomycetes	Agaricales	Physalacriaceae	Armillaria	borealis	0	0	0	0	0	0	0	0	0	0	0	0	0	0	0	0	0	0	0	0	0	0	0	0	0	0	0	0	0	0	0	0	1	0	0	0	0	0	0	0	0	0	0
ASV_170	Basidiomycota	Agaricomycetes	Russulales	Peniophoraceae	Peniophora	molesta	0	0	0	0	0	0	18	0	0	14	0	0	0	0	0	0	0	71	0	21	0	0	0	0	0	0	0	0	0	0	0	0	0	0	0	0	0	0	7	123	45	0	86
ASV_171	Ascomycota	Saccharomycetes	Saccharomycetales	Saccharomycetales_fam_Incertae_sedis	Saccharomycetales_gen_Incertae_sedis	chickasaworum	0	603	0	0	0	0	0	0	0	0	20	0	0	0	0	0	0	0	1	0	0	0	0	0	0	0	0	56	0	0	0	0	0	0	0	0	0	0	0	0	0	0	0
ASV_172	Basidiomycota	Tremellomycetes	Filobasidiales	Filobasidiaceae	Filobasidium	chernovii	0	0	0	0	0	0	0	12	0	0	0	0	0	0	0	0	0	0	0	0	0	0	0	0	0	0	0	0	0	0	1	1	0	0	34	2	21	3	9	0	0	3	0
ASV_173	Basidiomycota	Agaricomycetes	Corticiales	Vuilleminiaceae	Vuilleminia	alni	0	0	0	0	0	0	154	0	0	0	0	0	0	0	0	0	0	0	0	0	0	0	0	0	0	0	0	0	0	0	0	0	0	0	0	0	0	0	0	0	0	0	0
ASV_175	Basidiomycota	Agaricomycetes	Thelephorales	Thelephoraceae	Thelephoraceae_gen_Incertae_sedis	sanduense	0	0	0	0	0	0	0	0	0	0	0	0	0	0	0	3	0	0	34	0	0	0	0	0	6	1	0	5	0	0	11	0	0	4	0	0	0	0	0	37	0	0	43
ASV_176	Basidiomycota	Tremellomycetes	Cystofilobasidiales	Mrakiaceae	Itersonilia	pannonica	0	0	0	0	0	0	0	0	0	0	0	0	0	0	0	0	0	0	0	0	0	0	0	0	0	0	0	0	0	0	0	0	3	0	0	0	0	0	0	0	0	0	0
ASV_177	Ascomycota	Dothideomycetes	Pleosporales	Melanommataceae	Petrakia	irregularis	0	0	0	0	220	0	0	0	0	0	0	0	0	3	0	16	0	0	0	0	0	0	0	0	0	0	0	0	0	0	0	0	0	0	0	0	0	0	0	0	0	0	0
ASV_178	Basidiomycota	Cystobasidiomycetes	Erythrobasidiales	Erythrobasidiaceae	Erythrobasidium	yunnanense	0	0	0	0	0	0	0	0	0	0	0	0	0	0	0	0	12	0	0	0	0	0	0	0	0	0	0	0	0	0	0	0	0	0	0	4	0	0	0	0	0	0	0
ASV_179	Basidiomycota	Agaricomycetes	Agaricales	Mycenaceae	Mycena	rosae-hissaricae	0	0	0	0	0	0	0	0	0	0	0	3	2	9	0	6	0	0	0	0	34	0	0	0	0	0	0	0	0	0	0	0	0	2	0	0	0	0	0	57	0	0	0
ASV_180	Ascomycota	Dothideomycetes	Pleosporales	Nigrogranaceae	Nigrograna	mycophila	0	0	0	0	0	0	0	0	0	0	21	0	0	7	0	8	0	0	0	0	0	0	1	0	31	0	0	0	0	0	0	0	0	4	0	0	0	0	0	2	0	0	0
ASV_182	Basidiomycota	Agaricomycetes	Russulales	Peniophoraceae	Peniophora	simulans	0	0	0	0	0	0	0	0	0	0	0	0	0	0	0	0	0	0	0	0	0	0	0	0	0	0	0	0	0	0	0	0	0	0	0	0	0	2	0	0	0	0	6
ASV_183	Basidiomycota	Agaricomycetes	Agaricales	Physalacriaceae	Armillaria	borealis	0	0	0	0	0	0	0	0	0	0	0	0	0	0	0	0	0	0	0	0	0	0	0	0	0	0	0	0	0	0	0	0	0	0	0	0	0	0	0	0	0	0	0
ASV_185	Ascomycota	Sordariomycetes	Hypocreales	Nectriaceae	Fusarium	nurragi	0	0	0	0	0	0	13	0	0	32	0	0	0	0	0	25	0	0	0	0	0	0	0	0	0	0	0	0	0	0	0	0	0	0	0	0	0	0	0	0	0	0	0
ASV_186	Fungi_phy_Incertae_sedis	Fungi_cls_Incertae_sedis	Fungi_ord_Incertae_sedis	Fungi_fam_Incertae_sedis	Fungi_gen_Incertae_sedis	Fungi_sp_incertae_sedi	0	0	0	0	0	0	0	0	0	0	0	0	550	6	0	0	0	0	0	0	0	0	0	0	0	0	0	0	0	0	0	0	0	0	0	8	0	0	0	0	0	0	0
ASV_187	Ascomycota	Dothideomycetes	Mycosphaerellales	Teratosphaeriaceae	Neocatenulostroma	encephalarti	69	0	0	0	0	0	0	0	0	125	0	0	1	0	0	0	0	0	122	8	30	0	0	0	0	0	0	13	9	0	0	0	0	0	0	0	10	0	0	0	0	0	2
ASV_188	Basidiomycota	Agaricomycetes	Agaricales	Physalacriaceae	Flammulina	velutipes	0	0	0	0	0	0	0	0	0	0	0	0	0	0	0	0	0	0	0	0	0	0	0	0	0	0	0	0	0	0	0	0	0	0	0	0	0	0	0	0	0	0	0
ASV_189	Basidiomycota	Tremellomycetes	Cystofilobasidiales	Cystofilobasidiaceae	Cystofilobasidium	macerans	0	0	0	0	0	0	0	0	0	0	0	0	0	0	0	0	0	0	0	0	0	0	0	0	0	0	0	0	0	0	0	0	0	0	0	0	0	0	0	0	0	0	0
ASV_190	Ascomycota	Leotiomycetes	Leotiales	Tympanidaceae	Aotearoamyces	nothofagi	0	0	0	0	0	0	0	0	0	0	0	0	0	0	0	0	23	0	0	0	0	0	0	0	0	0	0	0	0	0	0	0	0	0	0	0	0	0	0	0	0	0	0
ASV_192	Ascomycota	Dothideomycetes	Pleosporales	Cucurbitariaceae	Neocucurbitaria	juglandicola	0	0	0	0	0	0	0	0	0	4	25	75	0	17	0	0	0	0	0	0	0	0	0	0	0	0	0	0	0	0	21	0	0	0	0	0	0	0	0	39	0	0	0
ASV_193	Ascomycota	Dothideomycetes	Pleosporales	Leptosphaeriaceae	Leptosphaeria	triseptatus	0	0	0	3	0	0	0	0	0	0	0	7	0	0	0	0	0	0	0	0	0	0	0	0	0	0	0	0	0	0	0	0	0	0	0	0	0	0	0	0	0	0	0
ASV_195	Basidiomycota	Tremellomycetes	Cystofilobasidiales	Cystofilobasidiaceae	Cystofilobasidium	capitatum	0	0	0	0	0	0	7	0	0	3	0	0	56	0	0	0	0	0	0	0	0	0	0	0	0	0	0	0	0	0	0	0	0	0	5	0	0	0	0	0	0	0	0
ASV_196	Basidiomycota	Microbotryomycetes	Sporidiobolales	Sporidiobolaceae	Rhodosporidiobolus	colostri	40	0	0	0	0	0	0	0	0	0	14	0	0	0	0	0	0	0	3	0	0	0	0	7	0	0	0	0	0	0	3	0	0	0	0	0	0	0	0	0	0	0	0
ASV_198	Ascomycota	Dothideomycetes	Capnodiales	Paradevriesiaceae	Paradevriesia	pseudoamericana	0	0	0	0	0	0	0	0	0	4	0	0	0	0	0	0	0	0	0	0	0	0	0	0	0	0	0	0	0	0	0	0	0	0	0	0	0	0	0	0	0	0	0
ASV_199	Ascomycota	Dothideomycetes	Pleosporales	Didymellaceae	Epicoccum	endophyticum	0	0	0	0	0	0	0	0	0	0	0	0	0	0	0	0	0	4	0	0	0	0	0	0	0	0	0	0	0	0	0	0	0	0	0	0	0	0	424	0	0	76	0
ASV_200	Ascomycota	Dothideomycetes	Mycosphaerellales	Teratosphaeriaceae	Teratosphaeria	miniata	0	0	0	0	0	0	0	0	0	0	0	0	0	4	0	3	0	0	4	14	0	0	0	0	0	0	0	0	0	0	0	0	31	0	0	0	0	0	0	0	0	0	4
ASV_203	Ascomycota	Dothideomycetes	Mycosphaerellales	Extremaceae	Petrophila	incerta	0	0	0	0	0	0	0	0	0	0	0	0	0	0	0	0	0	0	13	0	0	0	6	0	0	0	0	0	0	0	0	5	0	0	0	0	0	0	0	0	0	0	0
ASV_204	Ascomycota	Sordariomycetes	Hypocreales	NA	NA	NA	0	0	0	0	0	0	0	0	0	0	0	0	6	0	0	0	0	0	0	0	0	0	0	0	0	0	0	0	0	0	0	0	0	0	0	0	0	0	0	0	0	0	0
ASV_205	Ascomycota	Dothideomycetes	Pleosporales	Pleosporaceae	Pleosporaceae_gen_Incertae_sedis	variabilis	0	0	0	0	0	0	0	0	0	0	0	0	0	0	0	0	0	0	0	0	0	0	0	0	0	0	0	0	0	0	1	25	0	0	0	0	6	0	0	0	0	0	0
ASV_206	Ascomycota	Arthoniomycetes	Lichenostigmatales	Phaeococcomycetaceae	Phaeococcomyces	mexicanus	0	0	0	0	0	0	0	0	0	0	27	0	0	0	0	0	0	0	0	0	0	0	3	0	0	0	0	0	0	0	0	0	212	4	0	6	0	0	0	0	0	0	0
ASV_207	Basidiomycota	Agaricomycetes	Polyporales	Phanerochaetaceae	Bjerkandera	ecuadorensis	0	0	0	0	0	0	0	0	0	0	0	0	0	0	0	0	0	0	0	0	0	0	0	0	0	0	0	0	2	0	0	0	0	0	0	0	0	0	0	1	0	0	0
ASV_208	Ascomycota	Lecanoromycetes	Lecanorales	Ramalinaceae	Bacidina	terricola	0	0	0	0	0	34	11	0	0	0	0	0	5	0	0	0	0	0	0	0	0	0	0	0	15	0	0	0	0	0	0	0	0	0	0	0	0	0	0	0	0	0	0
ASV_209	Ascomycota	Dothideomycetes	Pleosporales	Didymellaceae	Didymella	keratinophila	0	0	0	0	0	0	0	0	0	39	0	0	0	0	0	96	0	0	0	0	0	0	0	0	0	0	0	0	0	0	92	0	0	0	0	0	0	0	0	0	0	0	0
ASV_210	Basidiomycota	Tremellomycetes	Tremellales	Bulleraceae	Genolevuria	amylolytica	0	0	0	0	0	0	0	0	0	0	0	0	0	0	0	0	0	0	0	0	0	0	0	0	5	13	0	0	0	0	0	0	0	2	0	0	0	0	0	0	0	0	0
ASV_212	Ascomycota	Dothideomycetes	Dothideomycetes_ord_Incertae_sedis	Dothideomycetes_fam_Incertae_sedis	Dothideomycetes_gen_Incertae_sedis	tenebrio	0	0	0	0	0	0	0	0	0	0	0	0	0	0	0	0	0	0	0	0	0	0	17	0	7	0	21	0	0	0	0	0	0	0	2	0	1	0	0	0	0	0	0
ASV_214	Ascomycota	Dothideomycetes	Mycosphaerellales	Teratosphaeriaceae	Penidiella	ellipsoidea	0	0	0	0	0	0	0	0	0	0	20	0	0	0	0	0	0	0	0	6	0	0	0	0	0	0	0	0	0	0	9	0	0	0	0	0	0	0	0	0	0	0	0
ASV_216	Basidiomycota	Tremellomycetes	Tremellales	Cryptococcaceae	Teunia	korlaensis	0	0	0	0	0	0	0	0	0	0	0	0	0	0	0	0	0	0	5	0	0	0	0	0	3	42	0	0	0	0	0	2	0	0	2	5	0	0	0	0	0	0	0
ASV_217	Basidiomycota	Agaricomycetes	Russulales	Peniophoraceae	Peniophora	simulans	0	0	0	0	0	0	16	0	0	0	0	0	0	0	0	0	0	0	0	0	0	0	0	0	0	0	0	0	0	0	0	0	0	0	0	0	0	0	0	48	18	0	22
ASV_218	Fungi_phy_Incertae_sedis	Fungi_cls_Incertae_sedis	Fungi_ord_Incertae_sedis	Fungi_fam_Incertae_sedis	Fungi_gen_Incertae_sedis	Fungi_sp_incertae_sedi	0	0	0	0	0	0	0	0	0	0	0	0	0	0	0	0	0	0	0	0	0	0	0	0	0	0	0	0	0	0	0	0	0	0	0	426	0	0	0	0	0	0	0
ASV_219	Ascomycota	Dothideomycetes	Pleosporales	Didymellaceae	Ascochyta	phacae	0	0	0	0	0	0	0	0	141	0	0	0	3	0	0	0	0	0	7	0	0	0	0	0	0	0	0	0	0	0	0	0	0	0	0	30	0	0	0	0	0	0	9
ASV_220	Basidiomycota	Tremellomycetes	Tremellales	Sirobasidiaceae	Fibulobasidium	murrhardtense	0	0	0	0	0	0	0	0	0	0	0	0	0	0	0	0	0	0	0	0	0	0	0	0	0	0	0	0	0	0	0	0	0	0	0	0	0	0	0	0	0	0	0
ASV_221	Ascomycota	Dothideomycetes	Mycosphaerellales	Teratosphaeriaceae	Neophaeothecoidea	proteae	0	0	0	0	0	0	0	0	0	0	0	0	1	0	0	0	353	0	0	0	0	0	0	0	0	0	0	0	0	0	0	0	0	0	0	0	0	0	0	0	0	0	0
ASV_222	Basidiomycota	Microbotryomycetes	Sporidiobolales	Sporidiobolaceae	Sporobolomyces	reniformis	0	0	0	0	0	0	0	0	0	0	0	0	0	0	0	0	0	0	0	0	0	0	0	0	0	0	0	0	0	0	1	0	0	0	0	0	4	0	0	0	0	0	1
ASV_223	Ascomycota	Dothideomycetes	Pleosporales	Didymellaceae	Phomatodes	phacae	0	0	0	0	0	0	0	0	0	0	0	0	0	0	0	0	0	0	4	0	0	0	0	0	4	0	0	0	0	0	108	0	36	0	0	0	0	0	0	0	0	0	0
ASV_224	Ascomycota	Sordariomycetes	Hypocreales	Nectriaceae	Nectria	eustromatica	0	0	0	0	0	0	0	0	0	0	0	0	0	0	0	0	0	0	0	0	0	0	0	0	0	0	0	0	0	0	0	0	0	0	0	0	0	0	0	0	0	0	0
ASV_225	Basidiomycota	Agaricomycetes	Corticiales	Corticiaceae	Marchandiobasidium	subtephropora	0	0	0	0	0	0	0	0	0	0	0	0	0	0	0	0	0	0	0	0	0	0	0	0	0	0	0	0	0	0	0	0	0	0	0	0	0	0	0	0	0	0	0
ASV_226	Basidiomycota	Tremellomycetes	Tremellales	Sirobasidiaceae	Fibulobasidium	murrhardtense	0	0	0	0	0	0	0	0	0	0	0	0	0	0	0	0	0	0	0	0	0	0	0	0	0	0	0	0	0	0	15	0	0	0	0	0	0	0	0	0	0	0	0
ASV_227	Basidiomycota	Tremellomycetes	Tremellales	Tremellales_fam_Incertae_sedis	Tremellales_gen_Incertae_sedis	picea	0	0	0	0	0	0	0	0	0	0	0	0	0	11	0	0	0	0	0	0	0	0	0	0	0	0	0	12	0	0	0	0	0	0	0	0	0	0	0	0	0	0	0
ASV_228	Basidiomycota	Agaricomycetes	Agaricales	Inocybaceae	Inocybe	nurragi	0	0	0	0	0	0	0	0	0	0	0	0	0	0	0	3	0	0	0	0	0	0	0	0	0	4	0	8	0	0	7	0	0	0	0	0	0	0	0	0	0	0	0
ASV_229	Basidiomycota	Cystobasidiomycetes	NA	NA	NA	NA	0	0	0	0	0	0	0	0	0	0	0	0	0	0	0	0	0	0	0	0	0	0	2	0	0	0	0	0	0	0	0	0	0	0	0	0	0	0	0	0	0	0	0
ASV_230	Basidiomycota	Agaricomycetes	Agaricales	Typhulaceae	Tygervalleyomyces	podocarpi	0	0	0	0	0	0	0	0	0	0	0	0	0	0	0	0	0	0	0	0	0	0	0	0	0	0	0	0	0	0	0	0	0	0	0	0	0	0	0	0	0	0	0
ASV_231	Basidiomycota	Exobasidiomycetes	Microstromatales	Microstromataceae	Microstroma	bacarum	0	0	0	0	0	0	0	0	0	0	0	0	0	0	0	0	0	0	0	0	0	0	0	0	0	0	0	0	0	0	0	0	0	0	0	0	0	0	0	0	0	0	0
ASV_233	Ascomycota	Lecanoromycetes	Lecanorales	Ramalinaceae	Bacidina	terricola	0	0	0	0	0	53	0	0	0	0	2	0	0	0	0	0	0	0	0	0	0	0	0	0	0	0	0	0	0	0	0	0	0	0	0	0	0	0	0	0	0	0	0
ASV_234	Ascomycota	Leotiomycetes	Phacidiales	Phacidiaceae	Darkera	picea	1	0	0	0	0	0	0	0	0	0	0	0	0	0	0	0	0	0	0	0	203	0	0	0	0	7	0	0	0	0	0	0	0	0	0	0	0	0	0	0	0	0	0
ASV_237	Ascomycota	Dothideomycetes	Capnodiales	Capnodiales_fam_Incertae_sedis	Capnodiales_gen_Incertae_sedis	proteae	0	0	0	0	0	0	0	0	0	0	0	0	0	0	0	0	0	187	0	0	0	0	0	0	0	0	0	0	0	0	0	0	0	0	0	0	0	0	0	0	0	0	0
ASV_238	Basidiomycota	Agaricomycetes	Corticiales	Vuilleminiaceae	Vuilleminia	alni	0	0	0	0	0	0	171	0	0	0	76	0	0	0	0	3	0	0	0	0	0	0	0	0	0	0	0	0	0	0	0	0	0	0	0	0	0	0	0	0	0	0	0
ASV_239	Basidiomycota	Agaricomycetes	Russulales	Peniophoraceae	Peniophora	simulans	0	0	0	0	0	0	0	0	0	0	0	0	0	0	0	0	0	0	0	0	0	0	0	0	0	0	0	0	0	0	2	0	0	0	0	0	0	0	0	0	0	0	0
ASV_241	Basidiomycota	Tremellomycetes	Tremellales	Sirobasidiaceae	Fibulobasidium	murrhardtense	0	0	0	0	0	0	0	0	0	0	0	0	0	0	0	0	0	0	0	0	0	0	0	0	0	0	0	0	0	0	0	0	0	0	0	0	0	0	0	0	0	0	0
ASV_242	Ascomycota	Leotiomycetes	Erysiphales	Erysiphaceae	Blumeria	americana	0	0	0	0	0	0	0	0	0	0	0	0	0	0	0	0	0	0	0	0	0	0	0	0	0	0	0	0	0	0	0	0	0	0	0	0	0	0	0	0	0	0	0
ASV_243	Basidiomycota	Agaricomycetes	Russulales	Bondarzewiaceae	Heterobasidion	araucariae	0	0	0	0	0	0	0	0	0	4	0	6	0	0	0	0	0	0	0	0	0	0	0	0	0	0	0	0	0	0	0	0	0	0	0	0	0	0	0	0	0	0	0
ASV_246	Basidiomycota	Tremellomycetes	Tremellales	Rhynchogastremaceae	Papiliotrema	flavescens	0	0	0	0	0	0	0	0	0	0	0	0	0	0	0	0	0	0	0	0	0	0	0	0	0	0	0	0	0	0	0	0	0	0	0	0	0	0	0	0	0	0	8
ASV_247	Ascomycota	Dothideomycetes	Pleosporales	Amorosiaceae	Angustimassarina	camporesii	0	0	0	0	0	0	0	0	0	8	0	0	0	22	0	0	0	0	0	0	0	0	0	0	0	0	0	0	0	0	8	0	0	2	0	0	0	0	0	0	0	0	0
ASV_248	Ascomycota	Ascomycota_cls_Incertae_sedis	Ascomycota_ord_Incertae_sedis	Ascomycota_fam_Incertae_sedis	Ascomycota_gen_Incertae_sedis	applanata	0	0	0	0	0	0	0	0	0	0	0	0	0	0	0	0	0	0	20	0	0	0	0	0	0	0	0	0	0	0	0	0	0	0	0	0	0	0	0	0	0	0	0
ASV_249	Basidiomycota	Wallemiomycetes	Wallemiales	Wallemiaceae	Wallemia	muriae	0	0	0	0	0	0	0	0	0	8	0	0	1	0	0	0	0	0	0	0	0	0	0	0	0	0	0	0	0	0	0	0	0	0	0	0	0	0	0	2	0	0	0
ASV_250	Basidiomycota	Tremellomycetes	Tremellales	Bulleribasidiaceae	Vishniacozyma	victoriae	0	0	0	0	0	0	0	0	0	0	0	0	0	0	0	0	0	0	3	0	0	0	0	0	0	0	0	11	0	0	0	0	0	0	0	89	0	0	0	0	0	0	0
ASV_251	Ascomycota	Dothideomycetes	Pleosporales	Cucurbitariaceae	Parafenestella	vindobonensis	0	0	0	0	0	0	0	0	0	7	0	0	0	21	0	0	0	0	0	0	0	0	0	0	0	0	0	0	0	0	14	0	0	0	0	0	0	0	0	2	0	0	0
ASV_252	Fungi_phy_Incertae_sedis	Fungi_cls_Incertae_sedis	Fungi_ord_Incertae_sedis	Fungi_fam_Incertae_sedis	Fungi_gen_Incertae_sedis	Fungi_sp_incertae_sedi	0	0	0	0	0	0	0	0	0	6	0	0	0	0	0	0	0	0	0	2	0	0	0	0	0	0	0	0	0	0	0	0	0	0	0	0	0	0	0	0	0	0	0
ASV_253	Ascomycota	Dothideomycetes	Pleosporales	Pleosporaceae	Alternaria	thalictrigena	0	0	0	0	0	0	0	0	0	0	0	0	0	0	0	0	0	0	0	0	72	19	0	0	0	6	0	0	0	0	0	7	0	0	0	0	0	0	0	0	0	0	0
ASV_255	Ascomycota	Dothideomycetes	Pleosporales	Pleosporaceae	Stemphylium	botryosum	0	0	0	0	0	0	0	0	0	0	0	0	0	0	0	0	0	0	0	0	0	0	0	0	0	0	0	0	0	0	0	0	0	0	0	0	0	0	0	0	0	0	0
ASV_257	Ascomycota	Leotiomycetes	Leotiales	Tympanidaceae	Aotearoamyces	nothofagi	0	0	0	0	0	0	0	0	0	0	0	0	0	0	0	0	0	0	0	0	0	0	0	0	0	0	0	0	0	0	0	0	0	0	0	0	0	0	0	0	0	0	0
ASV_259	Ascomycota	Dothideomycetes	Capnodiales	NA	NA	NA	0	0	0	0	0	0	0	0	0	11	0	0	0	0	0	108	0	0	3	0	0	0	0	0	0	0	0	0	2	0	0	0	0	0	0	0	2	0	0	0	0	0	0
ASV_260	Ascomycota	Sordariomycetes	Hypocreales	Nectriaceae	Fusarium	equiseti	0	0	0	0	0	0	0	0	0	0	0	0	0	0	0	0	0	0	0	0	0	0	0	0	0	0	0	0	0	0	0	0	0	0	0	0	0	3	0	0	0	0	0
ASV_261	Ascomycota	Dothideomycetes	Pleosporales	Pleosporaceae	Alternaria	rosae	0	0	0	0	0	0	0	0	0	0	0	0	0	0	0	0	0	0	0	14	0	0	15	0	0	0	8	0	0	0	0	0	0	7	0	0	0	0	99	17	0	20	0
ASV_262	Basidiomycota	Agaricomycetes	Agaricales	Psathyrellaceae	Coprinellus	ovatus	0	0	0	0	0	0	0	0	0	0	0	0	0	0	0	0	0	0	38	0	32	18	0	0	16	5	0	0	0	0	0	0	0	0	0	0	0	0	0	0	0	0	0
ASV_263	Basidiomycota	Tremellomycetes	Tremellales	Bulleribasidiaceae	Vishniacozyma	tephrensis	0	0	0	0	0	0	0	0	0	0	0	0	0	0	0	0	0	0	0	13	0	0	0	0	0	0	0	0	0	0	0	0	0	0	0	0	0	0	0	0	0	0	1
ASV_264	Ascomycota	Ascomycota_cls_Incertae_sedis	Ascomycota_ord_Incertae_sedis	Ascomycota_fam_Incertae_sedis	Ascomycota_gen_Incertae_sedis	nothofagi	0	0	0	0	0	0	0	0	0	0	0	0	0	0	0	0	0	0	0	0	0	0	2	0	0	0	0	0	0	0	0	0	0	0	0	0	0	0	0	0	0	0	0
ASV_265	Basidiomycota	Tremellomycetes	Tremellales	Bulleribasidiaceae	Vishniacozyma	globispora	0	0	0	0	0	0	0	0	0	0	0	0	0	0	0	5	0	0	0	0	0	0	0	0	0	0	0	0	0	0	0	0	0	0	0	0	0	0	0	0	0	0	0
ASV_266	Ascomycota	Ascomycota_cls_Incertae_sedis	Ascomycota_ord_Incertae_sedis	Ascomycota_fam_Incertae_sedis	Ascomycota_gen_Incertae_sedis	eucalyptorum	0	0	0	0	0	0	0	0	0	0	0	0	0	0	0	0	0	0	2	13	70	0	0	0	1	3	0	0	0	0	0	0	0	0	0	0	0	0	0	2	0	0	0
ASV_268	Ascomycota	Dothideomycetes	Pleosporales	Cucurbitariaceae	Neocucurbitaria	vachelliae	0	0	0	0	0	0	0	0	0	0	0	0	0	0	0	0	0	0	0	0	0	4	27	3	0	0	50	0	0	0	0	0	0	0	0	0	0	0	0	0	0	0	0
ASV_269	NA	NA	NA	NA	NA	NA	0	0	0	0	0	0	0	0	0	0	0	0	0	0	0	0	0	0	0	0	0	0	0	0	0	0	0	0	0	0	0	0	0	0	0	0	6	0	0	0	0	0	0
ASV_270	Ascomycota	Dothideomycetes	Pleosporales	Pleosporaceae	Pyrenophora	cynosuri	0	0	0	0	0	0	0	0	0	0	0	0	0	0	0	8	0	0	0	0	89	0	0	0	0	0	0	0	0	0	8	11	0	0	0	0	0	0	0	0	0	0	0
ASV_271	Basidiomycota	Cystobasidiomycetes	Erythrobasidiales	Erythrobasidiaceae	Erythrobasidium	yunnanense	0	0	0	0	0	0	0	0	0	0	0	0	0	0	0	0	0	0	0	0	0	0	0	0	0	0	0	0	0	0	0	0	0	0	0	0	0	0	0	0	0	0	1
ASV_273	Ascomycota	Lecanoromycetes	Lecanorales	Parmeliaceae	Neoprotoparmelia	plurisporibadia	0	0	0	0	0	0	0	0	0	0	0	0	0	0	0	4	0	0	0	0	0	0	0	0	0	0	0	0	0	0	0	0	0	0	0	0	0	0	0	0	0	0	0
ASV_274	Ascomycota	Dothideomycetes	Dothideales	Dothioraceae	Dothiora	laureolae	0	0	0	0	0	0	0	0	0	6	1	0	0	1	0	0	0	49	0	15	100	0	0	0	0	0	0	6	0	0	0	0	0	0	0	0	0	0	0	0	0	0	0
ASV_276	Basidiomycota	Tremellomycetes	Tremellales	Sirobasidiaceae	Fibulobasidium	murrhardtense	84	0	0	0	0	0	0	0	0	0	0	0	0	0	0	65	0	0	0	63	0	0	0	0	0	0	0	0	0	0	0	0	0	0	0	0	0	0	0	0	0	0	0
ASV_277	Basidiomycota	Tremellomycetes	Tremellales	Tremellaceae	Tremella	subalpina	0	0	0	0	0	0	0	0	0	0	0	0	0	0	0	0	0	0	0	0	0	0	0	0	4	0	0	0	0	0	0	0	0	0	0	0	0	0	0	0	0	0	0
ASV_278	Ascomycota	Taphrinomycetes	Taphrinales	Taphrinaceae	Taphrina	carpini	0	0	0	0	0	0	0	0	0	0	0	0	2	0	0	0	0	9	0	5	0	0	0	0	0	0	0	0	0	0	0	0	0	0	0	0	0	0	0	0	0	0	0
ASV_279	Ascomycota	Lecanoromycetes	Lecanorales	Ramalinaceae	Toniniopsis	dissimilis	0	0	0	0	0	0	0	0	0	0	0	0	0	0	0	0	0	0	0	0	0	0	6	0	0	12	0	0	0	0	0	0	0	0	0	0	0	0	0	0	0	0	0
ASV_281	Ascomycota	Sordariomycetes	Hypocreales	Hypocreaceae	Trichoderma	virilente	0	0	0	0	0	0	0	0	0	0	0	0	0	0	0	0	0	0	0	0	0	0	0	0	0	0	0	0	0	0	0	0	0	0	0	0	0	0	0	0	0	0	0
ASV_282	Ascomycota	Candelariomycetes	Candelariales	Candelariaceae	Candelariella	pacifica	0	0	0	0	0	0	0	0	0	0	0	0	6	0	0	0	0	0	0	6	0	5	0	0	0	0	0	0	0	0	0	0	0	0	0	0	0	0	0	0	0	0	0
ASV_284	Ascomycota	Leotiomycetes	Erysiphales	Erysiphaceae	Podosphaera	yulii	0	0	0	0	0	0	0	0	0	0	0	0	0	0	0	0	0	0	2	2	0	3	9	3	4	0	0	0	0	0	0	0	7	0	0	0	0	2	0	6	0	0	0
ASV_285	Ascomycota	Dothideomycetes	Cladosporiales	Cladosporiaceae	Cladosporium	pseudochalastosporoides	0	0	0	0	0	0	0	0	0	0	0	0	0	0	0	0	0	0	0	0	0	0	4	0	0	0	0	0	0	0	0	0	0	0	0	0	0	23	0	18	0	0	0
ASV_286	Ascomycota	Taphrinomycetes	Taphrinales	Taphrinaceae	Taphrina	veronaerambellii	0	0	0	0	0	0	10	0	0	0	0	0	0	0	0	0	0	0	0	0	0	0	0	0	0	0	0	6	0	0	0	0	0	0	0	0	0	0	0	0	0	0	0
ASV_287	Basidiomycota	Tremellomycetes	Tremellales	Tremellales_fam_Incertae_sedis	Tremellales_gen_Incertae_sedis	amylolytica	0	0	0	0	0	0	0	0	0	36	0	0	6	0	0	5	0	0	0	0	0	4	0	0	0	7	0	0	4	0	0	0	0	9	0	0	0	0	0	1	0	0	0
ASV_288	Basidiomycota	Agaricomycetes	Corticiales	Vuilleminiaceae	Vuilleminia	alni	0	0	0	46	0	0	0	188	0	0	0	0	0	0	0	0	0	0	0	0	0	0	0	0	0	0	0	0	0	0	0	0	0	0	0	0	0	0	0	0	0	0	0
ASV_289	Ascomycota	Dothideomycetes	Pleosporales	Didymellaceae	Neodidymelliopsis	ranunculi	0	0	0	0	0	0	0	0	0	0	0	0	0	0	0	0	0	0	0	0	0	0	4	0	0	0	0	0	0	0	0	0	0	0	0	0	0	0	0	0	0	0	0
ASV_290	Ascomycota	Leotiomycetes	Leotiales	Tympanidaceae	Aotearoamyces	nothofagi	0	0	0	0	0	0	0	0	0	0	0	0	0	0	0	0	0	0	0	0	0	0	0	0	0	0	0	0	0	0	0	0	0	0	0	0	0	0	0	0	0	0	0
ASV_291	Basidiomycota	Microbotryomycetes	Leucosporidiales	Leucosporidiaceae	Leucosporidium	yakuticum	0	0	0	4	0	0	0	0	149	0	0	0	0	0	0	0	69	0	0	0	0	0	0	0	0	0	0	0	0	0	0	0	0	0	0	0	0	0	0	0	0	0	0
ASV_292	Basidiomycota	Tremellomycetes	Tremellales	Bulleribasidiaceae	Dioszegia	crocea	0	0	0	0	0	0	0	0	0	0	3	14	0	0	0	0	0	2	0	0	0	0	0	0	0	0	0	1	0	0	0	0	0	0	3	0	0	0	0	0	0	0	0
ASV_294	Basidiomycota	Tremellomycetes	Cystofilobasidiales	Cystofilobasidiaceae	Cystofilobasidium	infirmominiatum	0	0	0	0	0	0	7	0	0	0	0	0	0	0	0	0	0	0	0	0	0	0	0	0	0	0	0	0	0	0	0	0	0	0	0	0	0	0	0	0	0	0	0
ASV_295	Ascomycota	Dothideomycetes	Pleosporales	Didymosphaeriaceae	Pseudopithomyces	angolensis	0	0	0	0	0	0	0	0	0	0	0	0	0	0	0	0	0	0	0	0	0	0	0	0	0	0	17	0	0	0	0	0	1	2	0	0	0	0	3	0	0	0	0
ASV_297	Ascomycota	Dothideomycetes	Dothideales	Dothideaceae	Scleroconidioma	sphagnicola	0	0	0	0	0	0	0	0	0	0	0	0	0	0	0	0	0	0	0	0	0	0	0	0	0	0	0	0	0	0	0	0	0	0	0	0	0	0	0	0	0	0	0
ASV_298	Ascomycota	Dothideomycetes	Mycosphaerellales	Mycosphaerellaceae	Ramularia	haroldporteri	0	0	0	0	0	0	0	0	0	0	0	0	0	0	0	0	0	0	0	0	0	0	0	0	0	0	0	0	0	0	0	0	0	0	0	0	0	0	0	0	0	0	0
ASV_299	Basidiomycota	Tremellomycetes	Tremellales	Bulleribasidiaceae	Vishniacozyma	dimennae	0	0	0	0	0	0	0	0	0	0	0	0	0	0	0	0	70	0	1	0	0	2	0	0	0	0	0	0	0	0	0	0	0	0	0	0	0	0	0	0	0	0	0
ASV_301	Basidiomycota	Tritirachiomycetes	Tritirachiales	Tritirachiaceae	Paratritirachium	curvibasidium	0	0	0	0	0	0	0	0	0	6	5	18	7	184	2	3	1	1	0	5	0	0	3	0	0	0	0	0	0	0	0	0	0	0	0	0	0	0	0	0	0	0	0
ASV_302	Ascomycota	Dothideomycetes	Mycosphaerellales	Mycosphaerellaceae	Xenoramularia	neerlandica	0	0	0	0	0	0	0	0	0	0	0	0	0	0	0	0	0	0	0	0	0	0	0	0	0	0	0	0	0	0	0	0	0	0	0	0	0	0	0	0	0	0	0
ASV_304	Ascomycota	Dothideomycetes	Capnodiales	Capnodiales_fam_Incertae_sedis	Capnodiales_gen_Incertae_sedis	strelitziicola	0	0	0	0	240	0	0	0	0	0	0	0	0	0	0	0	0	0	0	0	0	0	0	0	0	0	0	0	0	0	0	0	0	0	0	0	0	0	0	0	0	0	0
ASV_305	Basidiomycota	Tremellomycetes	Tremellales	Bulleribasidiaceae	Vishniacozyma	dimennae	0	0	0	0	0	0	0	0	0	0	0	0	0	0	0	0	0	0	0	0	85	0	2	0	0	0	0	0	0	0	0	0	27	0	0	0	0	0	0	0	0	0	0
ASV_306	Basidiomycota	Agaricomycetes	Russulales	Peniophoraceae	Peniophora	molesta	0	0	0	0	0	0	0	0	0	0	0	0	0	0	0	0	0	0	0	0	0	0	0	0	0	0	0	0	0	0	0	0	0	0	0	0	0	0	0	22	35	0	13
ASV_307	Ascomycota	Leotiomycetes	Helotiales	Sclerotiniaceae	Sclerencoelia	fraxinicola	0	0	0	0	0	0	0	0	0	0	0	0	0	0	0	0	0	0	0	0	0	0	0	0	0	0	0	0	0	0	0	0	0	0	0	0	0	0	0	0	0	0	0
ASV_309	Basidiomycota	Tremellomycetes	Tremellales	Rhynchogastremataceae	Papiliotrema	zeae	0	0	0	0	0	0	0	0	0	0	0	0	0	0	0	0	0	0	0	0	0	0	0	0	0	0	0	0	0	0	0	2	0	0	0	0	0	0	0	0	0	0	0
ASV_310	Ascomycota	Dothideomycetes	Mycosphaerellales	Mycosphaerellaceae	Ramularia	vizellae	0	0	0	0	0	0	0	0	0	5	0	0	5	0	0	0	0	0	0	0	0	0	0	0	0	0	0	0	0	0	0	0	0	0	0	0	0	0	0	0	0	0	0
ASV_311	Basidiomycota	Cystobasidiomycetes	Cystobasidiomycetes_ord_Incertae_sedis	Buckleyzymaceae	Buckleyzyma	salicina	0	0	0	0	0	0	0	0	129	7	0	0	0	0	0	0	0	0	0	0	0	0	0	0	0	0	0	0	0	0	0	0	0	0	0	22	0	0	0	0	0	0	0
ASV_312	Ascomycota	Dothideomycetes	Myriangiales	Myriangiaceae	Myriangium	nectandrae	0	0	0	0	0	0	0	0	0	6	0	0	0	0	0	19	0	0	0	5	0	0	0	0	0	0	0	0	0	0	0	0	0	0	0	0	0	0	0	0	0	0	0
ASV_314	Ascomycota	Dothideomycetes	Mycosphaerellales	Teratosphaeriaceae	Salinomyces	thailandica	0	0	0	35	0	0	74	0	0	0	0	0	0	3	0	4	0	0	0	0	0	0	0	0	0	0	0	0	0	0	0	15	0	0	0	0	0	0	0	0	0	0	0
ASV_317	Ascomycota	Saccharomycetes	Saccharomycetales	Lipomycetaceae	Myxozyma	geophila	0	0	0	0	0	0	0	0	0	0	0	0	0	0	0	0	0	0	0	0	0	0	0	0	0	0	0	0	0	0	0	0	0	0	0	0	0	0	0	0	0	0	0
ASV_318	Basidiomycota	Agaricomycetes	Boletales	Boletaceae	Crocinoboletus	pinetorum	0	0	4	205	0	0	28	2	0	0	0	0	0	0	0	0	0	0	0	0	0	0	0	0	0	0	0	0	0	0	0	0	0	0	0	0	0	0	0	0	0	0	0
ASV_319	Basidiomycota	Agaricomycetes	Agaricales	Inocybaceae	Inocybe	equiseti	0	0	0	0	0	0	0	0	0	0	0	0	0	0	1	0	0	0	0	0	0	0	0	0	0	0	0	0	0	0	81	0	0	0	0	0	0	0	0	0	0	0	0
ASV_320	Ascomycota	Leotiomycetes	Leotiales	Tympanidaceae	Aotearoamyces	nothofagi	0	0	0	0	0	0	0	0	0	0	0	0	0	0	0	0	0	0	0	0	0	0	0	0	0	0	0	0	0	0	0	0	0	0	0	0	0	0	0	0	0	0	0
ASV_321	Ascomycota	Dothideomycetes	Pleosporales	Melanommataceae	Petrakia	irregularis	0	0	0	0	0	0	0	0	0	13	0	0	0	0	0	0	0	0	0	0	0	0	0	0	0	0	0	0	0	0	0	0	0	0	0	0	0	0	0	10	0	0	0
ASV_322	Ascomycota	Dothideomycetes	Capnodiales	NA	NA	NA	0	0	0	0	0	0	0	0	0	0	0	0	0	0	0	0	0	0	0	0	0	0	0	0	0	0	0	0	0	0	0	0	0	0	0	47	0	0	0	0	0	0	0
ASV_325	Ascomycota	Dothideomycetes	Cladosporiales	Cladosporiaceae	Cladosporium	angustiherbarum	0	0	0	0	0	0	0	0	0	0	0	0	30	0	0	0	0	28	0	0	0	13	0	3	0	0	0	0	0	0	5	0	0	0	0	0	0	0	0	0	0	0	0
ASV_326	Ascomycota	Sordariomycetes	Conioscyphales	Conioscyphaceae	Conioscyphaceae_gen_Incertae_sedis	minutispora	0	0	0	0	0	0	0	0	0	0	0	0	0	0	0	0	0	0	0	0	0	0	0	0	0	0	0	0	0	0	0	0	0	0	0	0	0	0	0	0	0	0	0
ASV_327	Ascomycota	Dothideomycetes	Capnodiales	Capnodiaceae	Chaetocapnodium	placitae	0	0	0	0	0	0	0	0	0	0	0	0	0	0	0	4	0	0	0	0	0	0	0	0	17	0	0	0	0	0	0	0	0	0	0	0	0	0	0	0	0	0	0
ASV_328	Basidiomycota	Tremellomycetes	Filobasidiales	Filobasidiaceae	Filobasidium	magnum	0	0	0	0	0	0	0	0	0	0	0	0	0	0	0	0	0	21	0	0	0	0	0	0	0	0	0	0	1	0	0	0	9	0	0	0	0	0	0	0	0	0	0
ASV_330	Ascomycota	Sordariomycetes	Hypocreales	Hypocreaceae	Trichoderma	virilente	0	0	0	0	0	0	0	0	0	0	0	0	0	0	0	0	0	0	0	0	0	0	0	0	0	0	0	0	0	0	0	0	0	0	0	0	0	0	0	0	0	0	0
ASV_331	Basidiomycota	Agaricomycetes	Agaricales	Physalacriaceae	Armillaria	borealis	0	0	0	0	0	0	0	0	0	0	0	0	0	0	0	0	0	0	0	0	0	0	0	0	0	0	0	0	0	0	0	0	0	0	0	0	0	0	0	0	0	0	0
ASV_332	Basidiomycota	Agaricomycetes	Agaricales	Schizophyllaceae	Schizophyllum	NA	0	0	0	0	0	0	0	0	0	0	0	0	0	0	0	0	0	0	0	0	0	0	0	0	0	0	0	0	0	0	0	0	0	0	0	0	0	0	0	0	0	0	0
ASV_333	Ascomycota	Sordariomycetes	Glomerellales	Plectosphaerellaceae	Plectosphaerella	slobbergiarum	0	0	0	0	0	0	0	0	0	0	0	0	0	0	0	0	0	0	0	0	0	0	0	0	0	0	0	0	0	0	15	0	0	0	0	0	0	0	0	0	0	0	0
ASV_335	Ascomycota	Ascomycota_cls_Incertae_sedis	Ascomycota_ord_Incertae_sedis	Ascomycota_fam_Incertae_sedis	Ascomycota_gen_Incertae_sedis	nothofagi	0	0	0	0	0	0	0	0	0	0	0	0	0	0	0	0	0	0	0	0	0	0	0	0	0	0	0	0	0	0	0	0	0	0	0	0	0	0	0	0	0	0	0
ASV_337	Basidiomycota	Tremellomycetes	Cystofilobasidiales	Cystofilobasidiaceae	Cystofilobasidium	macerans	0	0	0	0	0	0	0	0	0	0	0	0	2	0	0	0	0	0	0	0	0	0	0	0	0	0	0	0	0	0	0	0	0	0	56	0	23	0	0	0	0	0	7
ASV_338	Ascomycota	Leotiomycetes	NA	NA	NA	NA	0	0	0	0	0	0	0	0	0	0	0	0	0	0	0	0	0	0	0	0	0	0	0	0	0	0	0	0	0	0	0	0	0	0	0	0	0	0	0	0	0	0	0
ASV_339	Basidiomycota	Agaricomycetes	Agaricales	Hymenogastraceae	Hebeloma	lactariolens	29	0	0	8	0	0	51	0	0	8	0	0	5	0	0	10	0	0	0	0	0	0	0	0	0	0	0	0	0	0	0	0	0	0	0	0	0	0	0	0	0	0	0
ASV_340	Basidiomycota	Tremellomycetes	Tremellales	Tremellaceae	Tremella	mesenterica	0	0	0	0	0	0	0	0	0	0	0	0	0	0	0	0	1	0	0	0	0	0	0	0	0	0	0	0	0	0	0	0	0	0	0	0	0	0	0	0	0	0	0
ASV_342	Ascomycota	Leotiomycetes	Erysiphales	Erysiphaceae	Phyllactinia	mimosae	0	0	0	0	0	0	0	0	0	0	0	0	0	0	0	0	0	0	0	0	0	0	0	0	0	0	0	0	0	0	0	0	0	0	0	0	0	0	0	0	0	0	0
ASV_345	Ascomycota	Dothideomycetes	Pleosporales	Cucurbitariaceae	Parafenestella	vindobonensis	0	0	0	0	0	0	0	0	0	0	0	0	0	0	0	0	0	0	0	0	0	0	0	0	0	0	0	0	0	0	0	0	0	0	0	0	0	0	0	0	0	0	0
ASV_346	Ascomycota	Dothideomycetes	Mycosphaerellales	Teratosphaeriaceae	Teratosphaeriaceae_gen_Incertae_sedis	ellipsoidea	0	0	0	0	0	0	0	0	0	11	0	0	0	0	0	4	0	0	22	0	0	17	0	0	0	0	0	1	0	0	0	0	0	0	0	0	0	0	0	0	0	0	0
ASV_347	Basidiomycota	Agaricomycetes	Russulales	Peniophoraceae	Peniophora	molesta	0	0	0	0	1	0	0	0	0	0	7	0	0	0	0	0	0	0	0	0	0	0	0	0	0	0	0	0	0	0	0	0	0	0	0	0	0	0	0	0	9	0	0
ASV_348	Ascomycota	Eurotiomycetes	Eurotiales	Aspergillaceae	Xeromyces	bisporus	0	0	0	0	0	0	0	0	0	0	0	0	0	0	0	0	0	0	0	0	0	0	0	0	0	0	0	0	0	0	0	0	0	0	0	0	0	0	0	0	0	0	0
ASV_349	Ascomycota	Lecanoromycetes	Caliciales	Physciaceae	Physcia	occidentalis	0	0	0	0	0	0	0	0	0	0	0	0	0	0	0	0	0	0	2	0	0	0	0	0	0	0	0	0	0	0	0	0	0	0	0	0	0	0	0	0	0	0	0
ASV_350	Basidiomycota	Agaricomycetes	Agaricales	Bolbitiaceae	Conocybe	praticola	0	0	0	170	15	6	25	0	0	0	0	0	0	0	0	1	0	0	0	0	0	0	0	0	0	0	0	0	0	0	0	0	0	0	0	0	0	0	0	0	0	0	0
ASV_353	Basidiomycota	Tremellomycetes	Cystofilobasidiales	Mrakiaceae	Itersonilia	perplexans	0	0	0	0	0	0	0	0	0	0	0	0	0	0	0	0	0	0	0	0	0	0	0	0	0	0	0	0	0	0	0	0	0	0	0	0	0	0	0	0	0	0	0
ASV_354	Ascomycota	Sordariomycetes	Diaporthales	Valsaceae	Cytospora	prunicola	0	0	0	0	0	0	10	2	0	0	0	0	0	0	0	0	7	0	0	0	0	0	0	0	0	0	0	0	0	0	0	0	0	0	0	0	0	0	0	0	0	0	0
ASV_355	Ascomycota	Dothideomycetes	Pleosporales	Cucurbitariaceae	Neocucurbitaria	vachelliae	0	0	0	0	0	0	0	0	0	0	0	0	0	0	0	0	0	0	0	0	0	0	0	0	0	0	0	0	0	0	0	0	0	0	0	0	0	0	0	0	0	0	0
ASV_359	Basidiomycota	Agaricomycetes	Agaricales	Inocybaceae	Inocybe	ossicola	0	0	0	0	0	0	0	0	0	5	0	0	0	0	0	0	0	0	0	0	0	0	0	0	0	0	0	0	0	0	0	0	0	0	0	0	0	0	0	0	0	0	0
ASV_360	Ascomycota	Dothideomycetes	Capnodiales	Capnodiales_fam_Incertae_sedis	Arthrocatena	tenebrio	0	0	0	0	0	0	0	0	0	2	0	0	4	0	0	0	0	0	5	0	0	0	0	0	0	0	0	0	0	0	0	0	0	0	0	16	0	0	0	0	0	0	0
ASV_361	Ascomycota	Eurotiomycetes	Eurotiales	Aspergillaceae	Penicillium	fusisporum	0	0	0	0	0	0	0	0	0	0	0	0	0	1	0	0	0	0	0	0	0	0	0	0	0	0	0	0	0	0	0	0	0	0	0	0	0	0	0	3	0	0	0
ASV_362	Basidiomycota	Tremellomycetes	Filobasidiales	Filobasidiaceae	Filobasidium	oeirense	0	0	0	0	0	10	0	0	0	0	0	0	2	0	0	0	0	0	0	0	0	0	0	0	0	0	0	2	0	0	0	0	0	0	0	0	1	0	1	0	0	8	1
ASV_363	Ascomycota	Dothideomycetes	Capnodiales	Paradevriesiaceae	Paradevriesia	pseudoamericana	0	0	0	0	0	0	0	0	0	0	0	0	0	0	0	0	0	0	0	0	0	0	0	0	0	0	0	0	0	0	0	0	0	0	0	0	0	0	0	0	0	0	0
ASV_364	Basidiomycota	Tremellomycetes	Filobasidiales	Filobasidiaceae	Filobasidium	magnum	0	0	0	0	0	0	0	0	0	0	0	0	0	0	0	0	1	6	0	0	0	0	0	0	0	0	0	0	0	0	2	0	0	0	0	0	0	0	0	0	0	0	0
ASV_365	Basidiomycota	Agaricomycetes	Agaricales	Physalacriaceae	Armillaria	borealis	0	0	0	0	0	0	0	0	0	0	0	0	0	0	0	0	0	0	0	0	0	0	0	0	0	0	0	0	0	0	0	0	0	0	0	0	0	0	0	0	0	0	0
ASV_366	Ascomycota	Lecanoromycetes	Lecanorales	Catillariaceae	Catillaria	flexuosa	0	0	0	0	0	0	0	0	0	0	0	0	0	4	0	0	0	0	3	10	0	0	0	0	0	0	0	0	0	0	0	0	0	0	0	0	0	0	0	0	0	0	0
ASV_368	Basidiomycota	Tremellomycetes	Tremellales	Bulleribasidiaceae	Dioszegia	crocea	0	0	0	0	0	0	0	0	0	0	0	0	0	0	0	0	0	0	0	0	0	0	0	0	0	0	0	0	0	0	0	0	0	0	0	0	0	0	0	0	0	0	0
ASV_369	Basidiomycota	Agaricomycetes	Auriculariales	Auriculariaceae	Auricularia	orientalis	0	0	0	0	0	0	20	0	0	0	0	0	0	0	0	0	0	0	0	0	0	0	0	0	0	0	0	0	0	0	0	0	0	0	0	0	0	0	0	0	0	0	3
ASV_370	Basidiomycota	Agaricomycetes	Corticiales	Vuilleminiaceae	Vuilleminia	alni	0	0	0	0	0	0	0	0	0	0	0	0	0	0	0	0	0	0	0	0	0	0	0	0	0	0	0	0	0	0	0	0	0	0	0	0	0	25	0	0	0	0	0
ASV_371	Basidiomycota	Agaricomycetes	Agaricales	Pleurotaceae	Pleurotus	ostreatus	0	0	0	0	0	0	0	0	0	0	0	0	0	0	0	0	0	0	0	0	0	0	0	0	0	0	0	0	0	0	0	0	0	0	0	0	0	0	0	0	0	0	0
ASV_372	Ascomycota	Dothideomycetes	Pleosporales	Occultibambusaceae	Brunneofusispora	sennae-torae	0	0	0	0	0	0	0	0	0	0	0	0	4	0	0	0	0	0	0	5	0	0	0	0	0	0	0	0	0	0	0	0	0	0	0	0	0	0	0	4	0	0	3
ASV_375	Ascomycota	Dothideomycetes	Mycosphaerellales	Teratosphaeriaceae	Teratosphaeriaceae_gen_Incertae_sedis	verkleyi	0	0	0	0	0	0	0	0	0	0	0	1	0	0	0	0	0	0	0	0	0	18	0	0	0	0	0	0	0	0	0	0	0	0	0	0	0	0	0	0	0	0	0
ASV_377	Basidiomycota	Exobasidiomycetes	Microstromatales	Microstromataceae	Microstroma	bacarum	0	0	0	0	0	0	0	0	0	0	0	0	0	0	0	0	0	0	0	0	0	0	6	0	0	0	0	0	0	0	0	0	0	0	0	0	0	0	0	0	0	0	0
ASV_379	Ascomycota	Leotiomycetes	Helotiales	Sclerotiniaceae	Botryotinia	ranunculi	0	0	0	0	0	0	0	0	0	0	0	0	0	0	0	0	0	0	0	0	0	0	0	0	0	0	0	0	0	0	0	0	0	0	0	0	0	0	0	0	0	0	0
ASV_381	Basidiomycota	Malasseziomycetes	Malasseziales	Malasseziaceae	Malassezia	restricta	0	1	0	0	0	10	0	0	0	0	0	0	0	0	0	0	0	0	0	0	0	0	0	0	0	0	0	0	0	0	0	0	0	0	0	0	0	0	0	0	0	0	0
ASV_382	Ascomycota	Leotiomycetes	Rhytismatales	Rhytismataceae	Hypoderma	siculum	0	0	0	0	0	0	0	0	0	20	0	0	0	0	0	0	0	0	0	0	0	0	0	0	0	34	0	0	0	0	10	0	0	0	0	35	0	0	0	0	0	0	0
ASV_383	Ascomycota	Lecanoromycetes	Lecanorales	Ramalinaceae	Toniniopsis	dissimilis	0	0	0	0	0	0	0	0	0	0	0	0	0	0	0	0	0	0	0	0	0	0	0	0	0	0	0	0	0	0	0	0	0	0	0	0	0	0	0	0	0	0	0
ASV_384	Basidiomycota	Agaricomycetes	Agaricales	Mycenaceae	Mycena	obducens	0	0	0	0	0	0	0	0	0	0	0	0	0	0	0	0	0	105	9	0	0	1	0	0	1	2	0	0	0	0	0	0	0	4	0	0	0	0	0	0	0	0	0
ASV_385	Ascomycota	Dothideomycetes	Pleosporales	Didymellaceae	Ascochyta	phacae	0	0	0	0	0	0	0	0	0	0	0	0	0	0	0	0	0	0	0	0	0	0	0	0	0	0	0	0	0	0	0	0	0	0	0	0	0	0	0	0	0	0	0
ASV_387	Ascomycota	Dothideomycetes	Pleosporales	Nigrogranaceae	Nigrograna	obliqua	0	0	0	0	0	0	0	0	0	6	0	0	0	0	0	9	0	0	0	0	0	0	0	0	0	0	0	0	0	0	0	0	0	0	0	0	0	0	0	0	0	0	0
ASV_390	Basidiomycota	Tremellomycetes	Tremellales	Bulleraceae	Genolevuria	armeniaca	0	0	0	0	0	0	0	0	0	0	0	0	5	0	0	8	0	0	0	3	0	0	0	0	0	0	0	0	0	0	0	0	0	0	0	19	0	0	0	0	0	0	0
ASV_391	Basidiomycota	Agaricomycetes	Russulales	Peniophoraceae	Peniophora	simulans	0	0	0	0	0	0	21	0	0	0	0	0	0	0	0	0	0	0	0	0	0	0	0	0	0	0	0	0	0	0	0	0	0	0	0	0	0	0	0	0	0	0	0
ASV_392	Basidiomycota	Tremellomycetes	Tremellales	Bulleribasidiaceae	Vishniacozyma	dimennae	0	0	0	0	0	0	0	0	0	0	0	0	0	0	0	0	0	0	0	0	0	0	0	0	0	0	0	0	0	0	0	0	0	0	0	0	0	0	0	0	0	0	0
ASV_394	Basidiomycota	Agaricomycetes	Russulales	Stereaceae	Acanthophysium	bisporum	0	0	0	0	0	0	0	0	0	0	0	0	0	0	0	0	0	0	0	0	0	0	0	0	0	0	0	0	0	0	0	0	0	0	0	0	0	0	0	0	0	0	0
ASV_395	Ascomycota	Dothideomycetes	Pleosporales	Pleosporales_fam_Incertae_sedis	Pleosporales_gen_Incertae_sedis	angolensis	0	0	0	0	0	0	0	0	0	0	0	0	0	0	0	0	0	0	0	0	0	0	0	0	0	0	0	0	0	0	0	0	0	0	0	0	0	0	0	0	0	0	0
ASV_396	Ascomycota	Sordariomycetes	Hypocreales	Bionectriaceae	Bionectriaceae_gen_Incertae_sedis	aloicola	0	0	0	0	0	0	0	0	0	0	0	0	0	0	0	0	0	0	0	0	0	0	0	0	0	0	0	0	0	0	0	0	0	0	0	0	0	0	0	0	0	0	0
ASV_397	Basidiomycota	Tremellomycetes	Tremellales	Bulleribasidiaceae	Vishniacozyma	victoriae	0	0	0	0	0	0	0	0	0	0	0	0	0	0	0	0	0	0	0	0	0	4	0	12	0	0	0	5	2	0	1	0	0	0	13	0	0	0	0	0	0	0	0
ASV_398	Basidiomycota	Agaricomycetes	Agaricales	Physalacriaceae	Armillaria	borealis	0	0	0	0	0	0	0	0	0	0	0	0	0	0	0	0	0	0	0	0	0	0	0	0	0	0	0	0	0	0	0	0	0	0	0	0	0	0	0	0	0	0	0
ASV_399	Ascomycota	Sordariomycetes	Diaporthales	Valsaceae	Cytospora	prunicola	0	0	0	0	0	0	0	0	0	0	0	0	0	0	0	0	0	0	0	0	0	0	0	0	0	0	0	0	0	0	0	0	0	0	0	0	0	0	0	0	0	0	0
ASV_401	Ascomycota	Lecanoromycetes	Caliciales	Physciaceae	Physcia	rhizinata	0	0	0	0	0	0	0	0	0	0	0	0	0	0	0	0	0	0	0	0	0	0	7	0	0	0	0	8	0	21	0	0	0	0	0	0	0	0	0	0	0	0	0
ASV_403	Ascomycota	Leotiomycetes	NA	NA	NA	NA	0	0	0	0	0	0	0	0	0	0	0	0	0	0	0	0	0	0	0	0	0	6	0	0	0	0	0	0	0	0	0	0	0	0	0	0	0	0	0	0	0	0	0
ASV_404	Ascomycota	Sordariomycetes	Conioscyphales	Conioscyphaceae	Conioscypha	pleiomorpha	0	0	0	0	0	0	0	0	0	0	0	0	0	0	0	10	0	0	0	0	0	0	0	0	0	0	0	0	0	0	0	0	0	0	0	164	0	0	0	0	0	0	0
ASV_405	Ascomycota	Dothideomycetes	Pleosporales	Cucurbitariaceae	Neocucurbitaria	vachelliae	0	0	0	0	0	0	0	0	0	0	0	4	0	0	1	0	0	0	0	0	0	27	34	3	0	0	27	2	0	0	0	0	0	0	0	0	0	0	0	0	0	0	0
ASV_407	Basidiomycota	Tremellomycetes	Holtermanniales	NA	NA	NA	0	0	0	0	0	0	0	0	0	0	0	0	0	0	0	3	0	0	0	0	0	0	0	15	0	0	0	0	0	0	0	0	0	0	0	0	28	0	0	9	0	0	0
ASV_408	Basidiomycota	Tremellomycetes	Tremellales	Bulleribasidiaceae	Vishniacozyma	dimennae	0	0	0	0	0	0	0	0	0	0	0	0	0	0	0	0	0	0	0	0	0	0	0	0	0	0	0	0	0	0	0	0	0	0	12	0	0	0	0	0	0	0	0
ASV_409	Ascomycota	Sordariomycetes	Sordariomycetidae_ord_Incertae_sedis	Rhamphoriaceae	Rhodoveronaea	varioseptata	0	0	0	0	107	0	0	0	0	0	0	0	0	0	0	0	0	0	0	0	0	0	0	0	0	0	0	0	0	0	0	0	0	0	0	0	0	0	0	0	0	0	0
ASV_410	Ascomycota	Dothideomycetes	Cladosporiales	Cladosporiaceae	Cladosporium	chasmanthicola	6	0	0	0	4	0	0	0	3	0	0	0	0	3	0	0	0	0	0	0	0	0	10	0	0	0	16	0	0	1	0	0	0	0	0	0	0	9	8	4	0	18	7
ASV_411	Basidiomycota	Agaricomycetes	Agaricales	Mycenaceae	Mycena	rhododendri	0	0	0	0	0	0	0	0	0	0	0	0	0	0	0	0	0	0	0	0	0	0	1	0	0	0	0	0	0	0	0	0	0	0	0	0	0	0	0	0	0	0	0
ASV_412	Basidiomycota	Tremellomycetes	Tremellales	Cuniculitremaceae	Kockovaella	haikouensis	0	0	0	0	0	0	0	0	0	0	0	0	0	0	0	0	0	0	0	0	0	0	0	0	0	0	0	0	0	0	0	0	0	0	0	0	0	0	0	0	0	0	0
ASV_414	Basidiomycota	Tremellomycetes	Filobasidiales	Filobasidiaceae	Filobasidium	magnum	0	0	0	0	0	0	0	0	0	0	0	0	0	0	0	0	0	0	0	0	0	0	0	0	0	0	0	0	0	0	0	0	0	0	0	2	12	0	9	0	14	0	3
ASV_415	Ascomycota	Dothideomycetes	Capnodiales	Capnodiales_fam_Incertae_sedis	Capnodiales_gen_Incertae_sedis	strelitziicola	0	0	0	0	0	0	0	0	0	0	0	0	6	0	0	0	0	0	0	0	0	0	0	0	0	0	0	0	0	0	0	0	0	0	0	0	0	0	0	0	0	0	0
ASV_416	Basidiomycota	Agaricomycetes	Thelephorales	Thelephoraceae	Thelephoraceae_gen_Incertae_sedis	hainanensis	0	0	0	0	0	0	5	0	0	7	0	0	0	0	0	0	0	0	0	0	0	0	0	0	0	0	0	0	0	0	6	0	0	0	0	0	0	0	0	45	0	0	58
ASV_419	Ascomycota	Dothideomycetes	Pleosporales	Cucurbitariaceae	Protofenestella	ulmi	0	0	0	60	0	0	88	0	0	0	0	0	0	0	0	0	0	0	0	0	0	0	0	0	0	0	0	0	0	0	0	0	0	0	0	0	0	0	0	0	0	0	0
ASV_421	Basidiomycota	Tremellomycetes	Filobasidiales	Filobasidiaceae	Filobasidiaceae_gen_Incertae_sedis	dingjieense	0	97	0	0	0	0	0	0	0	0	0	0	0	6	0	0	0	0	0	2	0	2	0	0	0	0	0	1	0	0	0	0	0	0	0	0	0	0	0	0	0	0	0
ASV_422	Basidiomycota	Agaricomycetes	Agaricales	Inocybaceae	Inocybe	boothii;Fusarium	0	0	0	0	0	0	0	0	0	0	0	0	0	0	0	0	0	0	0	0	0	0	0	0	0	0	0	0	0	0	0	0	0	0	0	0	0	0	0	0	0	0	0
ASV_426	Basidiomycota	Agaricomycetes	Auriculariales	Hyaloriaceae	Protomerulius	pertusus	0	0	0	0	0	0	0	0	0	0	0	0	0	0	0	0	0	0	0	0	0	7	0	0	0	0	0	0	0	0	0	0	0	0	0	0	0	5	0	0	0	0	0
ASV_427	Fungi_phy_Incertae_sedis	Fungi_cls_Incertae_sedis	Fungi_ord_Incertae_sedis	Fungi_fam_Incertae_sedis	Fungi_gen_Incertae_sedis	Fungi_sp_incertae_sedi	0	0	0	0	0	0	0	0	0	0	0	0	0	0	0	0	0	0	0	0	0	0	0	0	0	0	0	0	0	0	0	0	0	0	0	0	0	0	0	0	0	0	0
ASV_429	Basidiomycota	Tremellomycetes	Tremellales	Tremellales_fam_Incertae_sedis	Tremellales_gen_Incertae_sedis	zeae	0	0	0	0	0	0	0	0	0	0	0	0	0	0	0	0	0	0	0	0	0	0	0	0	0	0	0	0	0	0	0	0	0	0	0	0	0	0	0	0	0	0	0
ASV_430	Ascomycota	Candelariomycetes	Candelariales	Candelariaceae	Candelaria	pacifica	0	0	0	0	0	0	0	0	0	0	26	0	0	0	0	0	0	0	0	0	0	0	9	0	20	0	0	0	0	0	0	0	0	0	0	0	0	0	0	0	0	0	0
ASV_431	Basidiomycota	Microbotryomycetes	Microbotryomycetes_ord_Incertae_sedis	Microbotryomycetes_fam_Incertae_sedis	Curvibasidium	cygneicollum	0	0	0	0	0	0	0	0	0	0	0	0	0	0	0	0	0	0	0	0	0	0	0	0	0	0	0	0	0	0	0	0	0	0	0	0	0	0	0	0	0	0	0
ASV_433	Basidiomycota	Agaricostilbomycetes	Agaricostilbales	Kondoaceae	Kondoa	foliicola	0	0	0	0	0	0	0	0	0	0	0	0	0	0	0	0	0	0	0	0	0	0	0	0	0	10	0	0	0	0	0	0	0	0	0	0	0	0	0	0	0	0	0
ASV_434	Basidiomycota	Agaricomycetes	Polyporales	Meruliaceae	Mycoacia	taiwanensis	0	0	0	0	0	0	0	0	0	0	0	0	0	0	0	0	0	0	0	0	0	0	0	0	0	0	0	0	0	0	0	0	0	0	0	0	0	0	0	3	0	0	0
ASV_435	Ascomycota	Sordariomycetes	Calosphaeriales	Pleurostomataceae	Pleurostoma	repens	0	0	0	0	0	0	0	0	0	0	0	0	0	0	0	0	0	0	0	0	0	0	0	0	0	0	0	0	0	0	0	0	0	0	0	0	0	0	0	0	0	0	0
ASV_436	Basidiomycota	Tremellomycetes	Filobasidiales	Piskurozymaceae	Piskurozyma	capsuligena	0	0	0	0	0	0	0	0	0	0	0	0	0	0	0	0	0	0	0	0	0	0	0	0	0	0	0	0	0	0	2	0	0	0	0	0	0	0	0	0	0	0	0
ASV_439	Ascomycota	Dothideomycetes	Pleosporales	Didymellaceae	Didymella	negundinis	0	0	0	0	0	0	0	0	0	0	0	0	0	0	0	0	0	0	0	0	0	0	0	0	0	0	0	0	0	0	0	0	0	0	0	0	0	0	0	0	0	0	0
ASV_440	Ascomycota	Dothideomycetes	Pleosporales	Didymellaceae	Boeremia	lycopersici	0	0	0	0	0	0	0	0	0	0	0	0	0	0	0	0	0	0	13	0	0	0	0	0	3	0	0	0	0	0	0	0	0	0	0	0	0	0	0	0	0	0	0
ASV_442	Basidiomycota	Tremellomycetes	Tremellales	Bulleribasidiaceae	Vishniacozyma	victoriae	0	0	0	0	0	0	0	0	0	0	0	0	0	0	0	0	0	0	0	0	0	0	0	0	0	0	0	0	0	0	0	0	0	0	0	0	0	0	0	0	0	0	0
ASV_444	Ascomycota	Leotiomycetes	Helotiales	Vandijckellaceae	Vandijckella	johannae	0	0	0	0	0	0	0	0	0	0	16	0	4	0	0	0	0	0	0	0	0	0	0	0	0	0	0	0	0	0	0	0	0	0	0	0	0	0	0	0	0	0	0
ASV_445	Ascomycota	Dothideomycetes	Pleosporales	Didymosphaeriaceae	Pseudocamarosporium	piceae	0	0	0	0	0	0	0	0	0	0	0	0	0	0	0	0	0	0	0	0	0	0	0	0	0	0	0	0	0	0	0	0	0	0	0	0	0	0	0	0	0	0	0
ASV_446	Basidiomycota	Tremellomycetes	Holtermanniales	NA	NA	NA	35	0	0	0	0	0	0	0	0	0	0	0	0	0	0	0	0	0	0	0	0	0	0	0	0	0	0	0	0	0	0	0	0	0	0	0	5	0	0	0	0	3	3
ASV_447	Basidiomycota	Cystobasidiomycetes	NA	NA	NA	NA	0	0	0	0	0	0	0	0	0	0	0	0	0	0	0	0	0	0	0	0	0	0	0	0	0	0	0	0	0	0	0	0	0	0	0	0	0	0	0	0	0	0	0
ASV_448	Ascomycota	Dothideomycetes	Mycosphaerellales	Teratosphaeriaceae	Batcheloromyces	sedgefieldii	0	0	0	0	0	0	0	0	0	0	0	0	0	0	0	0	0	0	0	2	0	0	0	0	0	0	0	0	0	0	0	0	0	0	0	0	4	0	0	0	0	0	0
ASV_449	Fungi_phy_Incertae_sedis	Fungi_cls_Incertae_sedis	Fungi_ord_Incertae_sedis	Fungi_fam_Incertae_sedis	Fungi_gen_Incertae_sedis	Fungi_sp_incertae_sedi	0	0	0	0	0	0	0	0	0	0	0	0	0	0	0	0	0	0	0	0	0	0	0	0	0	23	16	0	0	0	0	0	0	0	0	0	0	0	0	0	0	0	0
ASV_451	Basidiomycota	Agaricomycetes	Agaricales	Psathyrellaceae	Coprinellus	ovatus	0	0	0	0	0	0	47	0	0	0	0	0	0	0	0	0	0	0	20	0	11	4	3	0	9	0	8	0	0	0	0	0	0	0	0	0	0	0	0	0	0	0	0
ASV_452	Ascomycota	Dothideomycetes	Mycosphaerellales	Mycosphaerellaceae	Ramularia	unterseheri	0	0	0	0	0	0	0	0	0	6	0	4	0	0	0	0	0	0	4	0	0	9	0	0	0	0	0	0	0	0	0	0	0	0	0	0	0	0	0	0	0	0	0
ASV_453	Basidiomycota	Wallemiomycetes	Wallemiales	Wallemiaceae	Wallemia	sebi	0	0	0	0	0	0	0	0	0	0	0	0	0	0	0	0	0	0	0	0	0	0	0	0	0	0	0	0	0	0	0	0	0	0	0	0	0	0	0	0	0	0	0
ASV_455	Ascomycota	Dothideomycetes	Pleosporales	Phaeosphaeriaceae	Phaeosphaeriaceae_gen_Incertae_sedis	gahniae	0	0	0	0	0	0	0	0	0	0	0	0	1	0	0	0	0	0	0	0	0	0	0	0	0	0	0	0	0	0	0	0	0	0	0	0	0	0	0	0	0	0	0
ASV_457	Ascomycota	Dothideomycetes	Capnodiales	Paradevriesiaceae	Paradevriesia	pseudoamericana	0	0	0	0	0	0	27	0	0	6	0	0	0	0	0	0	0	0	0	0	0	0	0	0	5	0	0	0	0	0	0	6	0	0	0	0	0	0	0	0	0	0	0
ASV_458	Ascomycota	Leotiomycetes	Helotiales	Discinellaceae	Pseudopezicula	betulae	0	0	0	0	0	0	0	0	0	11	0	9	25	0	0	21	0	0	0	0	0	9	0	0	17	0	0	0	0	0	0	0	0	0	0	0	0	0	0	0	0	0	0
ASV_459	Basidiomycota	Agaricomycetes	Agaricales	Strophariaceae	Hypholoma	lactariolens	0	0	0	0	0	0	0	0	0	0	0	0	0	0	0	0	0	0	0	0	0	0	0	0	0	0	0	0	0	0	0	0	0	0	0	0	0	0	0	0	0	0	0
ASV_460	Ascomycota	Dothideomycetes	Capnodiales	Paradevriesiaceae	Paradevriesia	pseudoamericana	0	0	0	0	0	0	0	0	0	0	0	0	0	0	0	0	0	0	0	0	0	0	0	0	0	0	0	0	0	0	0	0	0	0	0	0	0	0	0	0	0	0	0
ASV_463	Basidiomycota	Tremellomycetes	Tremellales	Rhynchogastremaceae	Papiliotrema	flavescens	0	0	0	0	0	0	0	0	0	0	0	0	0	0	0	0	0	0	0	0	0	0	0	0	0	0	0	0	0	0	0	0	0	0	0	0	0	0	0	0	0	0	0
ASV_465	Ascomycota	Leotiomycetes	Helotiales	Mollisiaceae	Phialocephala	amethystea	0	0	0	0	0	0	0	0	0	2	0	0	0	0	0	0	0	0	0	0	0	0	0	0	16	0	69	0	0	0	0	0	0	0	0	0	0	0	0	0	0	0	0
ASV_466	Basidiomycota	Agaricomycetes	Boletales	Boletaceae	Crocinoboletus	pinetorum	0	0	0	0	0	0	0	0	0	2	0	0	15	6	0	0	0	0	0	0	6	0	84	2	5	11	9	0	0	0	0	0	0	0	0	0	0	0	0	0	0	0	0
ASV_467	Basidiomycota	Agaricomycetes	Russulales	Peniophoraceae	Peniophora	molesta	0	0	0	0	0	0	0	0	0	0	30	0	0	0	0	0	0	0	0	0	0	0	0	0	0	1	0	0	0	0	0	0	0	0	0	0	0	6	0	17	3	0	12
ASV_468	Ascomycota	Sordariomycetes	Hypocreales	Sarocladiaceae	Sarocladium	bactrocephalum	0	0	0	0	0	0	0	0	0	0	0	0	1	0	0	0	0	0	0	0	0	0	0	0	0	0	0	0	0	0	0	0	0	0	0	0	0	0	0	0	0	7	0
ASV_470	Basidiomycota	Agaricomycetes	Russulales	Stereaceae	Stereum	bisporum	0	0	0	0	0	0	7	0	0	0	0	0	0	0	0	0	0	0	0	0	0	0	0	0	0	0	0	0	0	0	0	0	0	0	0	0	0	0	0	0	0	0	0
ASV_471	Ascomycota	Eurotiomycetes	Chaetothyriales	Herpotrichiellaceae	Capronia	leucadendri	0	0	0	0	0	0	6	0	0	0	0	0	0	0	0	0	0	0	0	0	0	0	0	0	0	117	0	0	0	0	0	0	5	0	0	0	0	0	0	0	0	0	0
ASV_473	Basidiomycota	Tremellomycetes	Tremellales	Cuniculitremaceae	Kockovaella	haikouensis	0	0	0	0	0	0	0	0	0	0	0	0	0	1	0	0	0	0	0	0	0	0	0	0	0	0	0	0	1	1	0	0	0	0	0	0	0	0	0	0	0	0	0
ASV_474	Ascomycota	Dothideomycetes	Pleosporales	Pleosporaceae	Pyrenophora	cynosuri	0	0	0	0	0	0	0	0	0	0	0	0	0	0	0	0	0	0	0	0	0	9	41	0	0	0	0	0	0	0	0	0	0	0	0	0	0	0	0	0	0	0	26
ASV_475	Basidiomycota	Agaricomycetes	Auriculariales	NA	NA	NA	0	0	0	0	0	0	0	0	0	0	0	0	0	0	0	0	0	0	8	0	0	1	0	0	0	0	0	0	0	0	7	0	0	0	0	0	0	0	0	4	0	0	1
ASV_477	Basidiomycota	Agaricomycetes	Sistotremastrales	Sistotremastraceae	Sistotremastrum	guttuliferum	0	0	0	5	0	0	0	0	0	12	0	3	0	0	0	0	0	0	0	0	0	0	0	0	0	0	0	0	0	0	7	0	0	2	0	0	1	0	0	0	0	0	0
ASV_478	Ascomycota	Eurotiomycetes	Chaetothyriales	Trichomeriaceae	Trichomerium	foliicola	0	0	0	0	0	0	0	0	0	0	0	2	0	32	0	0	0	2	0	0	5	0	0	0	0	0	0	0	0	0	0	0	0	0	0	0	0	0	0	0	0	0	0
ASV_481	Ascomycota	Dothideomycetes	Capnodiales	NA	NA	NA	0	0	0	0	0	0	0	0	0	0	0	0	0	0	0	0	0	0	0	0	0	0	0	0	0	0	0	0	0	0	0	0	0	0	0	0	0	0	0	0	0	0	0
ASV_482	Ascomycota	Leotiomycetes	Erysiphales	Erysiphaceae	Blumeria	centenaria	0	0	0	0	0	0	0	0	0	0	0	0	0	0	0	0	0	0	0	0	4	48	73	4	0	2	0	0	0	0	0	0	0	0	0	0	0	0	0	0	0	0	0
ASV_483	Basidiomycota	Agaricomycetes	Polyporales	Phanerochaetaceae	Bjerkandera	ecuadorensis	0	0	0	0	0	0	0	0	0	0	0	0	0	0	0	0	0	0	0	0	0	0	0	0	0	0	0	0	0	0	0	0	0	0	0	0	0	0	0	0	0	0	0
ASV_485	Ascomycota	Dothideomycetes	Capnodiales	NA	NA	NA	0	0	0	0	0	9	4	0	0	1	0	0	0	1	0	0	0	0	1	1	0	0	0	0	0	0	0	0	0	0	0	0	0	0	0	0	0	0	0	0	0	0	0
ASV_486	Ascomycota	Lecanoromycetes	Lecanorales	Catillariaceae	Catillaria	flexuosa	0	0	0	0	0	0	0	0	0	0	0	0	8	0	0	0	0	0	0	7	0	0	0	0	0	0	0	0	0	0	0	0	0	0	0	0	11	0	0	0	0	0	0
ASV_488	Ascomycota	Dothideomycetes	Pleosporales	Didymellaceae	Neodidymelliopsis	negundinis	0	0	0	0	0	0	0	0	0	0	0	0	3	1	0	0	0	0	0	16	0	0	0	0	0	0	0	0	0	0	14	0	0	0	0	0	0	0	0	0	0	0	0
ASV_489	Basidiomycota	Cystobasidiomycetes	NA	NA	NA	NA	0	0	0	0	0	0	0	0	0	0	0	0	1	0	0	0	0	0	0	0	0	0	0	0	0	0	0	0	0	0	0	0	0	0	0	0	0	0	0	0	0	0	0
ASV_490	Ascomycota	Dothideomycetes	Pleosporales	Pleosporaceae	Alternaria	dactylidicola	0	0	0	0	0	0	0	0	0	0	0	0	0	0	0	0	0	0	0	0	0	0	0	0	0	0	0	0	0	0	0	0	0	0	0	10	0	0	0	0	21	0	11
ASV_491	Ascomycota	Eurotiomycetes	Chaetothyriales	Cyphellophoraceae	Cyphellophora	eucalypti	0	0	0	0	33	0	0	0	0	0	0	0	0	0	0	0	0	0	0	6	0	0	0	0	0	0	0	0	0	0	0	0	0	0	0	0	0	0	0	0	0	0	0
ASV_492	Basidiomycota	Agaricomycetes	Polyporales	Polyporaceae	Coriolopsis	hainanensis	0	0	0	0	0	0	0	0	0	0	0	0	0	0	0	0	0	0	0	0	0	23	0	0	0	0	2	4	0	0	0	0	0	0	0	0	0	6	6	0	0	0	0
ASV_495	Basidiomycota	Agaricomycetes	Agaricales	Lycoperdaceae	Lycoperdon	psammophila	0	0	0	0	0	0	0	0	0	0	0	0	0	0	0	0	0	0	0	0	0	0	0	0	0	0	0	0	0	0	0	0	0	0	0	0	0	0	0	0	0	0	0
ASV_497	Ascomycota	Dothideomycetes	Pleosporales	Cucurbitariaceae	Parafenestella	pseudoplatani	0	0	0	0	0	0	0	0	0	0	0	0	0	0	0	0	0	0	0	0	0	0	0	0	0	0	0	0	0	0	0	0	0	0	0	0	0	0	0	0	0	0	0
ASV_498	Basidiomycota	Tremellomycetes	Tremellales	Bulleribasidiaceae	Vishniacozyma	globispora	0	0	0	0	0	0	0	0	0	0	0	0	0	0	0	0	44	0	0	0	0	0	0	0	0	0	0	0	0	0	0	0	0	0	12	0	0	0	0	0	0	0	0
ASV_499	Ascomycota	Dothideomycetes	Pleosporales	Coniothyriaceae	Hazslinszkyomyces	aloes	0	0	0	0	0	0	0	0	0	0	0	0	0	0	0	0	0	0	0	0	0	0	0	0	0	0	0	0	0	0	0	0	0	0	0	0	0	0	0	0	0	0	0
ASV_500	Ascomycota	Dothideomycetes	Pleosporales	Cucurbitariaceae	Neocucurbitaria	vachelliae	0	0	0	0	0	0	0	0	0	0	0	0	0	0	0	0	0	0	0	0	0	0	0	6	0	0	0	0	0	0	0	0	0	0	0	0	0	0	0	0	0	0	0
ASV_501	Ascomycota	Dothideomycetes	Pleosporales	Didymosphaeriaceae	Paracamarosporium	fagi	0	0	0	0	0	0	0	0	0	0	0	0	0	0	0	0	0	0	0	0	0	0	0	0	0	0	0	0	0	0	0	0	0	0	0	0	0	0	0	0	0	0	0
ASV_508	Basidiomycota	Agaricomycetes	Polyporales	Fomitopsidaceae	Fomitopsis	subpinicola	28	0	0	0	0	0	3	0	0	35	0	0	0	0	0	5	0	0	0	0	0	0	0	0	3	2	0	0	0	0	0	0	0	0	0	0	0	0	0	0	0	0	0
ASV_509	Basidiomycota	Tremellomycetes	Tremellales	Sirobasidiaceae	Fibulobasidium	murrhardtense	0	0	0	0	0	0	0	0	0	0	0	0	0	0	0	46	0	0	0	0	0	7	0	0	0	0	0	0	2	0	0	0	0	0	0	0	0	0	0	0	0	0	0
ASV_510	Basidiomycota	Agaricomycetes	Agaricales	Radulomycetaceae	Radulomyces	alienatus	0	0	0	0	0	0	0	0	0	0	0	0	0	0	0	0	0	0	0	0	0	0	0	0	0	0	0	0	0	0	0	0	0	0	0	0	0	0	0	0	0	0	0
ASV_512	Ascomycota	Leotiomycetes	Helotiales	Discinellaceae	Pseudopezicula	betulae	0	0	0	0	0	0	0	0	0	3	0	0	0	0	0	6	0	0	6	0	0	6	0	0	0	2	0	1	0	0	0	0	0	0	0	0	0	0	0	0	0	0	0
ASV_513	Basidiomycota	Tremellomycetes	Tremellales	Bulleribasidiaceae	Vishniacozyma	victoriae	0	0	0	0	0	0	0	0	0	0	0	0	0	0	0	0	0	0	0	0	0	6	0	0	0	0	0	2	0	0	0	0	0	0	0	0	0	0	0	0	0	0	0
ASV_514	Ascomycota	Dothideomycetes	Pleosporales	Parapyrenochaetaceae	Parapyrenochaeta	cearensis	0	0	0	0	0	0	0	0	0	3	0	0	0	0	0	1	0	0	0	0	0	0	0	0	0	0	0	0	0	0	0	0	0	0	0	0	0	0	0	0	0	0	0
ASV_515	Ascomycota	Dothideomycetes	Pleosporales	Cucurbitariaceae	Neocucurbitaria	vachelliae	0	0	0	0	0	0	0	0	0	0	0	0	0	0	0	0	0	0	0	0	1	0	7	0	0	0	0	0	0	0	0	0	0	0	0	0	0	0	0	0	0	0	0
ASV_516	Ascomycota	Ascomycota_cls_Incertae_sedis	Ascomycota_ord_Incertae_sedis	Ascomycota_fam_Incertae_sedis	Ascomycota_gen_Incertae_sedis	eucalyptorum	0	0	0	0	0	0	0	0	0	0	0	0	0	0	0	0	0	0	0	0	0	0	0	0	0	0	0	18	0	0	0	0	0	0	0	0	0	0	0	0	0	0	0
ASV_517	Basidiomycota	Agaricomycetes	Polyporales	Polyporaceae	Fomes	subtephropora	18	0	0	5	0	0	10	1	0	6	0	0	0	0	0	11	0	58	0	0	0	0	0	0	0	2	0	0	0	0	0	0	0	0	4	0	0	0	0	0	0	0	0
ASV_518	Basidiomycota	Cystobasidiomycetes	Erythrobasidiales	Erythrobasidiaceae	Erythrobasidium	yunnanense	0	0	0	0	0	0	0	0	0	0	0	0	0	0	0	0	0	0	0	0	0	0	0	0	0	0	0	0	0	0	0	0	0	0	0	0	0	0	0	0	0	0	0
ASV_520	Basidiomycota	Agaricomycetes	Agaricales	Physalacriaceae	Cylindrobasidium	asperior	0	0	0	0	0	0	0	0	0	0	0	0	0	0	0	0	0	0	0	0	0	0	0	0	0	0	0	0	0	0	0	0	0	0	0	0	0	0	0	0	0	0	0
ASV_521	Basidiomycota	Agaricostilbomycetes	Agaricostilbales	Agaricostilbales_fam_Incertae_sedis	Agaricostilbales_gen_Incertae_sedis	lulangica	0	0	0	0	0	0	0	0	0	0	0	0	0	0	0	0	0	0	0	0	0	0	0	0	0	0	0	0	0	0	0	0	0	0	0	0	0	0	0	0	0	0	0
ASV_522	Basidiomycota	Tremellomycetes	Tremellales	Cryptococcaceae	Kwoniella	newhampshirensis	0	0	0	0	0	0	0	0	0	0	0	0	0	0	0	0	0	0	0	0	0	0	0	0	0	0	0	0	0	0	0	0	0	0	0	0	0	0	0	0	0	0	0
ASV_523	Ascomycota	Dothideomycetes	Mycosphaerellales	Dissoconiaceae	Dissoconium	proteae	0	0	0	0	0	0	5	0	0	0	0	0	0	0	0	0	0	0	0	0	0	0	0	0	0	0	0	0	0	0	0	0	0	0	0	0	0	0	0	0	0	0	0
ASV_524	Ascomycota	Leotiomycetes	Helotiales	Dermateaceae	Coleophoma	ericicola	0	0	0	0	0	0	0	0	0	0	0	0	0	0	0	0	0	0	0	0	0	0	0	0	0	0	0	0	0	0	0	0	0	0	0	0	0	0	0	0	0	0	0
ASV_525	Ascomycota	Eurotiomycetes	Eurotiales	Aspergillaceae	Penicillium	bialowiezense	0	0	0	2	0	0	0	0	0	10	0	0	1	0	0	0	0	17	0	1	0	8	0	0	3	0	0	0	0	0	0	0	0	0	0	0	0	0	0	0	0	0	0
ASV_526	NA	NA	NA	NA	NA	NA	0	0	0	0	0	0	0	0	0	0	0	0	0	0	0	0	0	0	0	0	0	4	0	0	0	0	0	0	0	0	0	0	0	0	0	0	0	0	105	0	0	0	2
ASV_528	Ascomycota	Dothideomycetes	Capnodiales	Capnodiales_fam_Incertae_sedis	Capnodiales_gen_Incertae_sedis	drakensbergensis	0	0	0	0	0	0	0	0	0	0	0	0	0	0	0	0	0	0	0	0	0	8	36	0	0	0	0	0	0	0	0	0	0	0	0	0	0	0	0	0	0	0	0
ASV_529	Basidiomycota	Agaricomycetes	Agaricomycetes_ord_Incertae_sedis	Agaricomycetes_fam_Incertae_sedis	Agaricomycetes_gen_Incertae_sedis	sclerocystidiosus	0	0	0	0	0	0	0	0	0	0	0	0	0	0	0	0	0	0	0	0	0	0	0	0	0	0	0	0	0	0	0	0	0	0	0	0	0	0	0	0	0	0	0
ASV_533	Basidiomycota	Agaricomycetes	Agaricales	Inocybaceae	Inocybe	major	0	0	0	0	0	0	15	0	0	0	0	0	0	2	0	0	0	0	0	0	0	2	0	0	0	0	0	0	0	0	0	0	0	0	0	0	0	0	0	0	0	0	0
ASV_534	Ascomycota	Eurotiomycetes	Eurotiales	Aspergillaceae	Aspergillus	purpureocrustaceus	0	0	0	0	0	0	0	0	0	0	0	0	0	0	0	0	0	0	0	0	0	0	2	0	0	0	0	0	0	0	0	0	0	0	0	0	0	0	0	0	0	0	0
ASV_535	Basidiomycota	Agaricomycetes	Polyporales	Meruliaceae	Phlebia	semisupina	0	0	0	0	0	0	0	0	0	0	0	0	0	0	0	0	0	0	0	0	0	0	0	0	0	0	0	0	0	0	0	0	0	0	0	0	0	0	0	0	0	0	0
ASV_539	Ascomycota	Eurotiomycetes	Eurotiales	Aspergillaceae	Penicillium	fuscoglaucum	0	0	0	0	0	0	0	0	0	0	0	0	1	0	0	0	0	0	0	0	0	0	0	0	0	0	0	0	0	0	0	0	0	0	0	0	0	0	0	0	0	0	0
ASV_540	Basidiomycota	Tremellomycetes	Tremellales	Bulleribasidiaceae	Derxomyces	taiwanicus	0	0	0	0	0	0	0	0	0	0	0	0	0	0	0	0	0	0	10	0	0	0	0	0	0	0	0	0	0	0	0	0	0	0	0	0	0	0	0	0	0	0	0
ASV_541	Basidiomycota	Agaricomycetes	Polyporales	Polyporaceae	Perenniporia	subtephropora	0	18	0	14	0	0	27	0	0	7	0	4	0	0	0	5	0	0	0	4	0	2	0	0	0	0	0	0	0	0	0	0	0	1	12	0	0	0	0	5	0	0	0
ASV_542	Ascomycota	Dothideomycetes	Pleosporales	Pleosporaceae	Alternaria	obclavata	0	0	0	0	0	0	0	0	0	0	0	0	0	0	0	0	0	0	0	0	0	0	0	0	0	0	0	0	0	0	0	0	5	0	0	0	0	0	2	0	0	29	0
ASV_547	Ascomycota	Leotiomycetes	Erysiphales	Erysiphaceae	Blumeria	americana	0	0	0	0	0	0	0	0	0	0	0	0	0	0	0	0	0	0	0	0	0	31	24	0	0	0	0	0	0	0	0	0	0	0	0	0	0	0	0	0	0	0	0
ASV_549	Ascomycota	Dothideomycetes	Mycosphaerellales	Teratosphaeriaceae	Teratosphaeriaceae_gen_Incertae_sedis	pseudocatenata	0	0	0	0	0	0	0	0	0	0	0	0	0	0	0	0	0	0	0	0	1	0	15	0	0	0	13	0	0	0	0	0	0	0	0	0	0	0	0	0	0	0	0
ASV_551	Ascomycota	Dothideomycetes	Pleosporales	Cucurbitariaceae	Neocucurbitaria	vachelliae	0	0	0	0	0	0	0	0	0	0	0	0	0	0	0	0	0	0	0	0	0	0	0	0	0	0	0	0	0	0	0	0	0	0	0	0	0	0	0	0	0	0	0
ASV_554	Ascomycota	Dothideomycetes	Pleosporales	Didymellaceae	Ascochyta	phacae	0	0	0	0	0	0	0	0	0	0	0	0	0	0	0	0	0	0	0	0	0	0	0	0	0	0	0	0	0	0	0	0	0	0	0	0	0	0	0	0	0	0	0
ASV_555	Ascomycota	Dothideomycetes	Dothideales	Dothioraceae	Perusta	inaequalis	0	0	0	0	0	0	0	0	0	11	0	0	0	0	0	0	0	15	0	0	0	0	0	0	0	0	0	0	0	0	0	0	0	0	0	2	0	0	0	0	0	0	0
ASV_556	Ascomycota	Eurotiomycetes	Chaetothyriales	Herpotrichiellaceae	Cladophialophora	minutissima	10	0	0	0	0	11	0	0	0	0	1	0	0	7	0	3	0	0	0	0	0	0	0	0	0	0	0	0	0	0	0	0	0	0	0	0	0	0	0	0	0	0	0
ASV_557	Basidiomycota	Tremellomycetes	Tremellales	Tremellaceae	Tremella	subalpina	0	0	0	0	0	0	0	0	0	0	0	0	0	0	0	0	0	0	0	0	0	0	0	0	0	0	0	0	0	0	0	0	0	0	0	0	0	0	0	2	0	0	0
ASV_558	Ascomycota	Lecanoromycetes	Caliciales	Physciaceae	Physcia	rhizinata	0	0	0	0	0	0	0	0	0	0	0	0	0	0	0	0	0	0	0	0	0	0	0	0	87	0	0	3	0	0	0	0	0	0	0	0	0	0	0	0	0	0	0
ASV_559	Basidiomycota	Tremellomycetes	Filobasidiales	Filobasidiaceae	Naganishia	albida	0	0	0	0	71	0	0	0	0	0	0	0	0	0	0	0	0	0	0	0	0	0	0	0	0	0	0	0	0	0	0	0	0	0	0	0	0	0	0	0	0	0	0
ASV_560	Ascomycota	Dothideomycetes	Mycosphaerellales	Mycosphaerellaceae	Xenoramularia	neerlandica	0	0	0	0	0	0	0	0	0	0	0	0	0	0	0	0	0	0	0	0	0	0	0	0	0	0	0	0	0	0	0	0	0	0	0	0	0	0	0	0	0	0	0
ASV_561	Ascomycota	Dothideomycetes	Pleosporales	Pleosporaceae	Alternaria	breviramosa	0	0	0	0	0	0	6	0	0	0	0	0	0	0	0	0	0	0	0	0	0	0	0	0	0	0	0	0	0	0	0	0	0	0	0	0	0	0	0	0	0	0	0
ASV_562	Ascomycota	Eurotiomycetes	Chaetothyriales	Chaetothyriales_fam_Incertae_sedis	Neophaeococcomyces	catenatus	0	0	0	0	0	0	0	0	0	4	0	0	0	0	0	0	0	0	0	0	0	0	0	0	0	0	0	0	1	0	0	0	0	0	0	0	0	0	0	0	0	0	0
ASV_565	Ascomycota	Dothideomycetes	Pleosporales	Didymellaceae	Ascochyta	phacae	0	0	0	0	0	0	0	0	0	0	0	0	0	0	0	0	0	0	0	0	0	4	0	0	0	0	0	0	0	0	0	0	0	0	0	0	0	0	0	0	0	0	0
ASV_566	Ascomycota	Dothideomycetes	Pleosporales	Pleosporaceae	Alternaria	sorghi	0	0	0	0	0	0	0	0	0	0	0	0	0	0	0	0	0	0	0	0	0	0	0	0	0	24	0	0	0	0	0	0	0	0	0	0	0	0	0	0	0	0	0
ASV_568	Basidiomycota	Tremellomycetes	Tremellales	Bulleribasidiaceae	Vishniacozyma	victoriae	0	0	0	2	0	0	0	0	0	0	0	0	0	0	0	0	0	0	0	0	0	0	0	0	0	0	0	0	0	0	0	0	0	0	0	38	3	0	0	0	0	0	0
ASV_569	Ascomycota	Dothideomycetes	Pleosporales	Cucurbitariaceae	Neocucurbitaria	vachelliae	0	0	0	1	0	0	0	0	0	0	0	0	0	0	0	0	0	0	0	0	0	0	56	0	0	0	30	0	0	0	0	0	0	0	0	0	0	0	0	0	0	0	0
ASV_570	Ascomycota	Dothideomycetes	Mycosphaerellales	Teratosphaeriaceae	Neophaeothecoidea	proteae	0	0	0	0	0	0	0	0	0	0	0	0	0	0	0	0	0	0	0	0	0	0	0	0	0	0	0	0	0	0	0	0	0	0	0	0	0	0	0	0	0	0	0
ASV_571	Ascomycota	Taphrinomycetes	Taphrinales	Taphrinaceae	Taphrina	flavorubra	0	0	0	0	0	0	0	0	0	0	0	0	0	0	0	0	0	0	0	0	0	0	0	12	0	0	0	0	0	0	0	0	0	0	0	0	0	0	0	0	0	0	0
ASV_572	Ascomycota	Dothideomycetes	Pleosporales	Cucurbitariaceae	Fenestella	parafenestrata	0	0	0	0	0	0	0	0	0	0	0	0	0	0	0	0	0	0	0	0	0	0	0	0	0	0	0	0	0	0	0	0	0	0	0	0	0	0	0	0	0	0	0
ASV_574	Ascomycota	Dothideomycetes	Botryosphaeriales	Botryosphaeriaceae	Alanphillipsia	aloetica	0	0	0	0	0	0	0	0	0	0	0	0	0	0	0	0	0	0	0	1	0	0	0	0	0	0	0	0	0	0	0	0	0	0	0	0	0	0	0	0	0	0	0
ASV_577	Basidiomycota	Agaricomycetes	Polyporales	Fomitopsidaceae	Laetiporus	ailaoshanensis	0	0	0	0	0	0	0	0	0	0	0	0	0	0	10	0	0	0	0	0	0	0	0	0	0	0	0	0	0	0	0	0	0	0	0	0	0	74	0	7	0	0	0
ASV_578	Basidiomycota	Cystobasidiomycetes	NA	NA	NA	NA	0	0	0	0	0	0	0	0	0	0	0	0	0	0	0	0	0	0	0	0	0	0	0	0	0	0	0	0	0	0	0	0	0	0	0	0	6	0	0	1	0	0	0
ASV_579	Ascomycota	Dothideomycetes	Pleosporales	Pleosporaceae	Pyrenophora	cynosuri	0	0	0	0	0	0	0	0	0	0	0	0	0	0	0	0	0	0	0	0	0	0	0	0	0	0	0	0	2	0	0	0	37	0	0	0	6	0	0	0	0	0	0
ASV_582	Ascomycota	Dothideomycetes	Mycosphaerellales	Teratosphaeriaceae	Penidiella	aggregata	0	0	0	0	0	0	0	0	0	0	0	0	0	0	0	0	0	0	0	0	0	3	0	0	0	0	0	0	3	0	15	0	53	0	0	0	0	0	0	0	0	0	0
ASV_583	Ascomycota	Sordariomycetes	Xylariales	Xylariales_fam_Incertae_sedis	Xylariales_gen_Incertae_sedis	australiensis	0	0	0	0	0	0	0	0	0	0	0	0	0	0	0	0	0	0	0	0	0	0	0	0	4	0	0	0	0	0	0	0	0	15	0	0	0	0	0	0	0	0	1
ASV_584	Basidiomycota	Agaricomycetes	Cantharellales	Hydnaceae	Sistotrema	phycophila	0	0	0	0	0	0	0	0	0	0	0	0	0	0	0	0	0	0	0	0	0	0	0	0	0	0	0	0	0	0	0	0	0	0	0	0	0	0	0	0	0	0	0
ASV_586	Ascomycota	Dothideomycetes	Pleosporales	Didymellaceae	Epicoccum	phragmospora	0	0	0	0	0	0	0	0	0	0	10	0	0	0	0	0	0	0	0	0	0	0	0	0	0	0	0	0	0	0	0	0	0	0	0	0	0	0	0	0	0	0	0
ASV_587	Ascomycota	Dothideomycetes	Mycosphaerellales	Mycosphaerellaceae	Ramularia	unterseheri	0	0	0	0	0	0	0	0	0	8	0	6	0	0	0	0	0	56	0	0	0	0	0	0	0	0	0	0	0	0	0	0	0	0	0	0	0	0	0	0	0	0	0
ASV_589	Ascomycota	Dothideomycetes	Pleosporales	Torulaceae	Torula	herbarum	0	0	0	0	0	0	0	0	0	0	3	0	0	0	0	7	0	49	0	6	0	0	1	0	0	0	0	0	0	0	0	0	0	0	0	0	0	0	0	0	0	0	0
ASV_590	Ascomycota	Leotiomycetes	Erysiphales	Erysiphaceae	Blumeria	dactylidis	0	0	0	0	0	0	0	0	0	0	0	0	0	0	0	0	0	0	0	0	0	0	0	0	0	6	0	0	0	0	6	0	0	0	0	0	0	0	0	0	0	0	0
ASV_591	Ascomycota	Sordariomycetes	Glomerellales	Plectosphaerellaceae	Gibellulopsis	serrae	0	0	0	0	0	0	0	0	0	0	0	0	5	0	0	0	0	0	0	5	0	0	0	0	0	0	0	0	0	0	0	0	0	0	0	0	0	0	0	0	0	0	3
ASV_592	Ascomycota	Lecanoromycetes	Caliciales	Caliciaceae	Amandinea	cataractae	9	0	0	0	0	0	0	0	0	0	9	0	0	0	0	0	0	0	0	0	0	0	0	0	0	0	0	0	0	0	0	0	0	0	0	0	0	0	0	0	0	0	0
ASV_593	Ascomycota	Eurotiomycetes	Chaetothyriales	Herpotrichiellaceae	Cladophialophora	behniae	0	0	0	0	0	0	0	0	0	0	0	0	0	0	0	0	0	0	0	0	0	0	0	0	0	0	0	0	0	0	0	0	0	0	0	0	0	0	0	0	0	0	0
ASV_594	Fungi_phy_Incertae_sedis	Fungi_cls_Incertae_sedis	Fungi_ord_Incertae_sedis	Fungi_fam_Incertae_sedis	Fungi_gen_Incertae_sedis	Fungi_sp_incertae_sedi	0	0	0	0	0	0	0	0	0	0	0	0	0	0	0	0	0	0	0	0	0	0	0	0	0	0	0	0	0	0	0	0	0	0	0	0	0	0	0	0	0	0	0
ASV_596	Basidiomycota	Agaricomycetes	Auriculariales	Hyaloriaceae	Protomerulius	pertusus	0	0	0	0	0	0	0	0	0	0	0	0	0	0	0	0	0	0	0	0	0	2	11	0	0	0	0	0	0	0	0	0	0	0	0	0	0	0	0	0	0	0	0
ASV_597	Ascomycota	Dothideomycetes	Mycosphaerellales	Mycosphaerellaceae	Graminopassalora	dolichandrae	0	0	0	0	0	0	0	0	0	8	0	0	0	0	0	0	0	0	0	8	0	0	0	0	0	0	0	0	0	0	0	0	0	0	0	0	0	0	0	0	0	0	0
ASV_599	Ascomycota	Eurotiomycetes	Chaetothyriales	Herpotrichiellaceae	Veronaea	japonica	0	0	0	0	0	0	0	0	0	0	0	0	0	3	0	0	0	0	0	0	0	0	0	0	0	0	0	0	0	0	0	0	0	0	0	0	0	0	0	0	0	0	0
ASV_601	Ascomycota	Saccharomycetes	Saccharomycetales	Phaffomycetaceae	Cyberlindnera	lachancei	0	0	0	0	0	0	0	0	0	0	0	0	0	0	0	0	0	0	0	0	0	0	0	0	0	0	0	0	0	0	0	0	0	0	0	0	0	0	0	0	0	0	1
ASV_602	Ascomycota	Sordariomycetes	Sordariomycetidae_ord_Incertae_sedis	Rhamphoriaceae	Rhodoveronaea	varioseptata	0	0	0	0	0	0	0	0	0	0	0	0	0	0	0	0	0	0	0	0	0	0	0	0	0	0	0	0	0	0	0	0	0	0	0	0	0	0	0	0	0	0	0
ASV_610	Ascomycota	Dothideomycetes	Capnodiales	Capnodiales_fam_Incertae_sedis	Arthrocatena	tenebrio	0	0	0	0	0	0	0	0	0	16	0	0	0	9	0	0	0	0	0	0	0	1	0	0	0	0	0	0	0	5	0	0	0	0	0	0	0	0	0	0	0	0	0
ASV_611	Fungi_phy_Incertae_sedis	Fungi_cls_Incertae_sedis	Fungi_ord_Incertae_sedis	Fungi_fam_Incertae_sedis	Fungi_gen_Incertae_sedis	Fungi_sp_incertae_sedi	0	0	0	0	0	0	0	0	0	0	0	0	0	0	0	0	0	0	0	0	2	0	0	0	0	0	0	0	0	0	0	0	0	0	0	0	0	0	0	0	0	0	0
ASV_613	Basidiomycota	Tremellomycetes	Trichosporonales	Trichosporonaceae	Prillingera	fragicola	0	0	0	0	0	0	0	0	0	0	0	0	0	0	0	0	0	0	0	0	0	0	0	0	0	0	0	0	0	0	0	0	0	0	0	0	0	0	0	0	0	0	0
ASV_614	Basidiomycota	Agaricomycetes	Agaricales	Physalacriaceae	Mycotribulus	indonesiae	0	0	0	0	0	0	0	0	0	0	0	0	0	0	0	0	0	0	0	0	0	0	0	0	0	0	0	0	0	0	0	0	0	0	0	0	0	0	0	0	0	0	0
ASV_615	Basidiomycota	Agaricomycetes	Agaricales	Strophariaceae	Pholiota	fulvozonata	0	0	0	0	0	0	0	0	0	0	0	0	0	0	0	0	0	0	0	0	0	0	0	0	0	0	0	0	0	0	0	0	0	0	0	0	0	0	0	0	0	0	0
ASV_616	Ascomycota	Eurotiomycetes	Chaetothyriales	Herpotrichiellaceae	Cladophialophora	behniae	0	0	0	0	0	0	0	41	0	0	0	0	0	0	0	0	0	0	0	0	0	0	0	0	0	0	0	0	0	0	0	0	0	0	0	0	0	0	0	0	0	0	0
ASV_617	Basidiomycota	Agaricostilbomycetes	Agaricostilbales	Kondoaceae	Kondoa	yuccicola	0	0	0	0	0	0	0	0	0	0	0	0	0	0	0	0	0	51	0	0	0	0	0	0	0	0	0	0	0	0	0	0	0	0	0	0	0	0	0	0	0	0	0
ASV_619	Ascomycota	Sordariomycetes	Hypocreales	Hypocreaceae	Trichoderma	citrinoviride	0	0	0	0	0	0	0	0	0	0	0	0	0	0	0	0	0	0	0	0	0	0	0	0	0	0	0	0	0	0	0	0	0	0	0	0	0	0	0	0	0	0	0
ASV_623	Ascomycota	Dothideomycetes	Mycosphaerellales	Teratosphaeriaceae	Devriesia	pseudoamericana	0	0	0	0	0	0	0	0	0	0	0	0	0	0	0	0	0	0	0	0	0	0	0	0	0	0	0	0	0	0	0	0	0	0	0	0	0	0	0	0	0	0	0
ASV_624	Ascomycota	Lecanoromycetes	Caliciales	Physciaceae	Physcia	occidentalis	0	0	0	0	0	0	0	0	0	0	0	0	0	0	0	0	0	2	0	4	0	1	0	0	0	0	0	0	0	0	0	0	0	0	0	0	0	0	0	0	0	0	0
ASV_627	Ascomycota	Eurotiomycetes	Chaetothyriales	Cyphellophoraceae	Cyphellophoraceae_gen_Incertae_sedis	livistonae	0	0	0	0	0	0	0	0	0	0	0	0	0	3	0	0	0	0	2	0	0	0	0	0	0	0	0	0	0	0	0	0	0	0	0	0	0	0	0	0	0	0	0
ASV_631	Ascomycota	Sordariomycetes	Sordariomycetes_ord_Incertae_sedis	Sordariomycetes_fam_Incertae_sedis	Sordariomycetes_gen_Incertae_sedis	truncata	0	0	0	0	0	0	0	0	0	0	0	0	0	0	0	0	0	23	0	0	0	0	0	0	2	0	0	0	0	0	0	0	0	0	0	0	0	0	0	0	0	0	0
ASV_638	Ascomycota	Saccharomycetes	Saccharomycetales	Debaryomycetaceae	Priceomyces	medius	0	0	0	0	0	0	0	0	0	0	0	0	0	0	0	0	0	0	0	0	0	0	0	0	0	0	0	0	0	0	0	0	0	0	0	0	9	0	0	0	0	0	0
ASV_639	Ascomycota	Dothideomycetes	Pleosporales	Pleosporaceae	Pyrenophora	cynosuri	0	0	0	0	0	0	0	0	0	0	0	0	0	0	0	0	0	0	0	0	0	0	0	0	0	0	0	0	0	0	0	0	0	0	0	0	0	45	0	0	0	27	0
ASV_640	Ascomycota	Dothideomycetes	Pleosporales	Cucurbitariaceae	Neocucurbitaria	vachelliae	0	0	0	0	0	0	0	0	0	0	0	0	0	0	0	0	0	0	0	0	0	0	0	0	0	0	0	0	0	0	0	0	0	0	0	0	0	0	0	0	0	0	0
ASV_642	Ascomycota	Dothideomycetes	Pleosporales	Leptosphaeriaceae	Leptosphaeria	urticae	0	0	0	0	0	0	8	0	0	0	0	0	0	2	0	2	0	20	0	0	0	0	0	0	0	0	0	0	0	0	0	0	0	0	0	0	0	0	0	0	0	0	0
ASV_643	Ascomycota	Dothideomycetes	Capnodiales	Cladosporiaceae	Cladosporium	aphidis	0	0	0	0	0	0	0	0	0	0	12	0	0	0	0	0	0	0	0	0	0	0	2	0	0	0	0	0	0	0	0	0	0	0	0	0	0	0	0	0	0	0	0
ASV_644	Basidiomycota	Agaricomycetes	Agaricales	Physalacriaceae	Flammulina	velutipes	0	0	0	0	0	0	0	0	0	0	0	0	0	0	0	0	0	0	0	0	0	0	0	0	0	0	0	0	0	0	0	0	0	0	0	0	0	0	0	0	0	0	0
ASV_650	Basidiomycota	Pucciniomycetes	Septobasidiales	Septobasidiaceae	Septobasidium	anacardiicola	0	0	0	0	0	0	0	0	0	0	0	0	0	0	0	0	0	0	0	0	0	0	0	0	0	0	0	0	0	0	0	0	0	0	0	0	0	0	0	0	0	0	0
ASV_654	Basidiomycota	Agaricomycetes	Agaricales	Pluteaceae	Volvariella	pulla	0	0	0	0	0	0	0	0	0	0	0	0	0	0	0	0	0	0	0	0	0	0	0	0	0	0	0	0	0	0	0	0	0	0	0	0	0	0	0	0	0	0	0
ASV_655	Ascomycota	Dothideomycetes	Muyocopronales	Muyocopronaceae	Muyocopron	laterale	0	0	0	0	0	0	0	0	0	4	0	0	0	0	0	0	0	0	0	0	0	0	0	0	0	0	0	0	0	0	0	0	0	0	0	0	0	0	0	0	0	0	0
ASV_657	Ascomycota	Leotiomycetes	Helotiales	Sclerotiniaceae	Botryotinia	ranunculi	0	0	0	0	0	0	0	0	0	0	0	0	0	0	0	0	0	0	0	0	0	0	0	0	0	0	0	0	0	0	2	0	0	0	0	0	0	7	0	0	22	0	4
ASV_658	Ascomycota	Dothideomycetes	Capnodiales	Capnodiaceae	Chaetocapnodium	placitae	0	0	0	0	0	0	0	0	0	0	0	0	0	0	0	0	1	0	0	0	0	0	0	0	0	0	0	0	0	0	0	0	0	0	0	0	0	0	0	0	0	0	0
ASV_659	Fungi_phy_Incertae_sedis	Fungi_cls_Incertae_sedis	Fungi_ord_Incertae_sedis	Fungi_fam_Incertae_sedis	Fungi_gen_Incertae_sedis	Fungi_sp_incertae_sedi	0	0	0	0	0	0	0	0	0	0	0	0	0	0	0	0	0	0	0	0	0	0	0	0	0	0	0	0	0	0	0	0	0	0	0	0	0	0	0	0	0	0	0
ASV_661	Basidiomycota	Agaricomycetes	Cantharellales	Hydnaceae	Sistotrema	melleopallidum	0	0	0	0	0	0	0	0	0	0	0	0	0	0	0	0	0	0	0	0	0	0	0	0	0	0	0	0	0	0	0	0	0	0	0	0	0	0	0	0	0	0	0
ASV_663	Ascomycota	Dothideomycetes	Pleosporales	Didymellaceae	Nothophoma	variabilis	0	0	0	0	0	0	0	0	0	0	0	0	0	0	0	0	0	0	0	0	0	0	0	0	0	0	5	0	0	0	0	0	2	0	0	0	0	0	0	0	0	0	0
ASV_664	Ascomycota	Dothideomycetes	Capnodiales	Capnodiales_fam_Incertae_sedis	Capnodiales_gen_Incertae_sedis	aggregata	0	0	0	0	0	0	0	0	0	0	0	0	0	0	0	0	0	0	0	1	0	0	0	0	0	0	0	0	0	0	0	0	0	0	0	0	0	0	0	0	0	0	0
ASV_666	Ascomycota	Dothideomycetes	Mycosphaerellales	Teratosphaeriaceae	Neohortaea	acidophila	0	0	0	0	0	0	0	0	0	0	0	0	0	0	0	0	0	0	0	0	0	0	0	0	0	0	0	0	0	0	0	0	0	0	0	0	0	0	0	0	0	0	0
ASV_668	Ascomycota	Sordariomycetes	Xylariales	Xylariales_fam_Incertae_sedis	Cryptostroma	rhamnicola	0	0	0	0	0	0	0	0	0	0	0	0	0	0	0	0	0	0	0	4	0	0	0	0	0	0	0	4	14	0	5	0	0	0	5	0	0	0	0	0	0	0	0
ASV_672	Ascomycota	Dothideomycetes	NA	NA	NA	NA	0	0	0	0	0	0	54	0	0	0	0	0	0	0	0	0	0	0	0	0	0	0	0	0	0	0	0	0	0	0	0	0	0	0	0	0	0	0	0	0	0	0	0
ASV_674	Basidiomycota	Cystobasidiomycetes	Cystobasidiales	Cystobasidiaceae	Occultifur	foliicola	0	0	0	0	0	0	0	0	0	0	0	0	0	0	0	0	0	0	0	0	0	0	0	0	0	0	0	0	0	0	0	0	0	0	0	0	0	0	0	0	0	0	0
ASV_677	Basidiomycota	Agaricomycetes	Boletales	Boletaceae	Crocinoboletus	pinetorum	0	0	0	0	0	0	0	0	0	0	0	0	0	0	0	0	0	0	1	0	0	0	4	0	0	0	0	0	0	0	0	0	0	0	20	0	0	0	0	0	27	0	0
ASV_678	Basidiomycota	Agaricomycetes	Auriculariales	Auriculariaceae	Auricularia	angiospermarum	0	0	0	0	0	0	0	0	0	0	0	0	0	0	0	0	0	0	0	0	0	0	0	0	0	0	0	0	0	0	0	0	0	0	0	0	0	0	0	0	0	0	6
ASV_679	Ascomycota	Dothideomycetes	Pleosporales	Melanommataceae	Gemmamyces	piceae	0	0	0	0	0	0	0	0	0	0	0	0	0	0	0	0	0	0	0	6	0	0	0	0	0	0	0	0	0	0	0	0	0	0	0	0	0	0	0	0	0	0	0
ASV_681	Ascomycota	Lecanoromycetes	Lecanorales	Ramalinaceae	Toniniopsis	dissimilis	0	0	0	0	0	0	0	0	0	0	0	0	0	0	0	0	0	0	0	0	0	0	0	0	0	0	0	0	0	0	0	0	0	0	0	0	0	0	0	0	0	0	0
ASV_684	Ascomycota	Dothideomycetes	Pleosporales	Pleosporaceae	Alternaria	thalictrigena	0	0	0	0	0	0	0	0	0	0	0	0	0	0	0	0	0	0	0	0	0	0	0	0	0	25	0	0	0	0	0	0	0	0	0	0	0	0	0	0	0	0	0
ASV_685	Basidiomycota	Cystobasidiomycetes	NA	NA	NA	NA	0	0	0	0	0	0	0	0	0	0	0	0	0	0	0	0	0	0	0	0	0	0	0	0	0	0	0	0	0	0	0	0	0	0	0	0	0	0	0	2	0	0	0
ASV_686	Basidiomycota	Tremellomycetes	Tremellales	Bulleribasidiaceae	Vishniacozyma	globispora	0	0	0	0	0	0	0	0	0	0	0	0	0	0	0	0	0	0	0	0	0	0	0	0	0	0	0	0	0	0	0	0	0	0	0	36	0	0	0	0	0	0	0
ASV_687	Ascomycota	Sordariomycetes	Diaporthales	Valsaceae	Cytospora	prunicola	0	0	0	0	0	0	0	0	0	0	0	0	0	0	0	0	0	0	0	0	0	0	0	0	0	0	0	0	0	0	0	0	0	0	0	0	0	0	0	0	0	0	0
ASV_690	Ascomycota	Dothideomycetes	Pleosporales	Cucurbitariaceae	Neocucurbitaria	vachelliae	0	0	0	0	0	0	0	0	0	0	0	0	0	0	0	0	0	0	0	0	0	1	0	0	0	0	0	0	0	0	0	0	0	0	0	0	0	0	0	0	0	0	0
ASV_691	Ascomycota	Sordariomycetes	Hypocreales	Stachybotryaceae	Stachybotrys	chartarum	0	0	0	0	0	0	0	0	0	0	0	0	0	0	0	0	0	0	0	0	0	0	0	0	0	0	0	0	0	0	0	0	0	0	0	0	0	0	0	0	2	0	0
ASV_692	Basidiomycota	Tremellomycetes	Tremellales	Tremellales_fam_Incertae_sedis	Tremellales_gen_Incertae_sedis	betulae	0	0	0	0	0	0	0	0	0	0	0	0	0	0	0	0	0	0	0	0	0	0	0	0	0	0	0	0	0	0	0	0	0	0	0	0	0	0	0	0	0	0	0
ASV_693	Ascomycota	Dothideomycetes	Pleosporales	Torulaceae	Torula	camporesii	0	0	0	0	0	0	0	0	0	0	0	0	0	0	0	0	0	0	0	0	0	0	0	0	0	0	0	0	0	0	0	0	0	0	0	0	0	0	0	0	0	0	0
ASV_694	Basidiomycota	Tremellomycetes	Tremellales	Rhynchogastremaceae	Papiliotrema	flavescens	0	0	0	0	0	0	0	0	0	0	0	0	0	0	0	0	0	0	0	0	0	0	0	0	0	0	0	0	0	0	0	0	0	0	0	0	0	0	0	0	0	0	0
ASV_695	Basidiomycota	Agaricomycetes	Polyporales	Polyporaceae	Ganoderma	sanduense	0	0	0	0	0	0	0	0	0	0	0	0	0	0	0	0	0	0	0	0	0	0	0	0	0	0	0	0	0	0	0	0	0	0	0	0	0	0	0	0	0	0	0
ASV_696	Ascomycota	Dothideomycetes	Pleosporales	Cucurbitariaceae	Cucurbitaria	oromediterranea	0	0	0	0	0	0	0	0	0	0	0	0	0	11	0	0	0	0	0	0	0	0	0	0	0	0	0	0	0	0	0	0	0	0	0	0	0	0	0	0	0	0	0
ASV_698	Ascomycota	Dothideomycetes	Capnodiales	Neodevriesiaceae	Neodevriesia	bulbillosa	0	0	0	0	0	0	0	0	0	0	0	0	0	0	0	0	0	0	0	0	0	0	0	0	0	0	0	0	0	0	0	0	0	0	0	0	0	0	0	0	0	0	0
ASV_702	Ascomycota	Sordariomycetes	Conioscyphales	Conioscyphaceae	Conioscypha	pleiomorpha	0	0	0	0	0	0	0	0	0	0	0	0	0	0	0	0	0	0	0	0	0	0	0	0	0	0	0	0	0	0	0	0	0	0	0	53	0	0	0	0	0	0	0
ASV_704	Basidiomycota	Agaricostilbomycetes	Agaricostilbales	Ruineniaceae	Ruinenia	fanjingshanensis	0	0	0	0	0	0	0	0	0	0	0	0	0	0	0	0	0	0	0	0	0	0	0	0	0	0	0	0	0	0	0	0	0	0	0	0	0	0	0	0	0	0	0
ASV_705	Ascomycota	Leotiomycetes	NA	NA	NA	NA	0	0	0	0	0	0	0	0	0	0	0	0	0	0	0	0	0	0	0	0	0	0	0	0	0	0	0	0	0	0	0	0	0	0	0	0	0	0	0	0	0	0	0
ASV_707	Basidiomycota	Agaricomycetes	Agaricales	Inocybaceae	Inocybe	rubra	0	0	0	0	43	0	0	0	0	0	0	0	0	0	0	0	0	0	0	0	0	0	0	0	0	0	0	0	0	0	0	0	0	0	3	0	0	0	0	0	0	0	0
ASV_710	Basidiomycota	Agaricomycetes	Agaricales	Psathyrellaceae	Coprinellus	ovatus	0	0	0	2	0	0	21	0	0	0	0	0	0	0	0	0	0	0	0	0	0	0	0	0	3	0	5	0	0	0	0	0	0	0	0	0	0	0	0	0	0	0	0
ASV_711	Ascomycota	Dothideomycetes	Pleosporales	NA	NA	NA	0	0	0	0	0	0	0	0	0	1	0	0	0	0	0	0	0	9	0	0	0	0	0	0	0	0	0	0	0	0	0	0	0	0	0	0	0	0	0	0	0	0	0
ASV_712	Ascomycota	Leotiomycetes	Erysiphales	Erysiphaceae	Podosphaera	yulii	0	0	0	1	0	0	0	0	0	5	0	0	0	0	0	9	0	0	0	0	0	0	42	0	0	0	0	0	0	0	0	0	0	0	0	0	0	0	0	0	0	0	0
ASV_714	Ascomycota	Dothideomycetes	Pleosporales	Melanommataceae	Petrakia	irregularis	0	0	0	0	0	0	0	0	0	0	0	0	5	10	0	0	0	0	0	0	0	0	0	0	0	0	0	0	0	0	0	0	0	0	0	0	0	0	0	0	0	0	0
ASV_719	Basidiomycota	Tremellomycetes	Tremellales	Bulleraceae	Genolevuria	amylolytica	0	0	0	0	0	0	0	0	0	0	0	0	0	0	0	0	0	0	0	0	0	3	2	0	0	0	0	0	0	0	0	0	0	0	0	0	0	0	0	0	0	0	0
ASV_721	Ascomycota	Dothideomycetes	Capnodiales	Capnodiales_fam_Incertae_sedis	Capnodiales_gen_Incertae_sedis	elasticus	0	0	0	0	0	0	0	0	0	0	0	0	0	0	0	0	0	0	0	0	0	0	0	0	0	0	0	0	0	0	0	0	0	0	0	0	0	0	0	0	0	0	0
ASV_723	Ascomycota	Dothideomycetes	Capnodiales	NA	NA	NA	0	0	0	0	0	0	0	0	0	12	0	0	0	0	0	0	0	0	0	0	0	0	0	0	0	0	0	0	0	0	0	0	0	0	0	0	0	0	0	0	0	0	0
ASV_724	Ascomycota	Dothideomycetes	Pleosporales	Cucurbitariaceae	Parafenestella	salicis	0	0	0	0	0	0	0	0	0	0	0	0	0	0	0	0	0	0	0	0	0	0	0	0	0	0	0	0	0	0	0	0	0	0	0	0	0	0	0	1	0	0	0
ASV_725	Basidiomycota	Agaricomycetes	Cantharellales	Ceratobasidiaceae	Rhizoctonia	carotae	0	0	0	0	0	0	0	0	0	0	0	0	0	0	0	0	0	0	0	0	0	0	0	0	0	0	0	0	0	0	0	0	0	0	0	0	0	0	0	0	0	0	0
ASV_726	Ascomycota	Dothideomycetes	Capnodiales	Capnodiales_fam_Incertae_sedis	Capnodiales_gen_Incertae_sedis	madagascariense	0	0	0	0	0	0	0	0	0	0	0	0	0	0	0	0	0	0	0	0	0	0	0	0	0	0	0	0	0	0	0	0	0	0	0	0	0	0	0	0	0	0	0
ASV_730	Basidiomycota	Agaricomycetes	Agaricales	Mycenaceae	Mycena	rosae-hissaricae	0	0	0	0	0	0	0	0	0	0	0	0	3	9	0	2	0	0	0	0	0	0	0	0	0	0	0	0	0	0	0	0	0	0	0	0	0	0	0	0	0	0	0
ASV_732	Ascomycota	Dothideomycetes	Capnodiales	NA	NA	NA	0	0	0	0	0	0	0	0	0	0	0	0	0	0	0	0	0	0	0	0	0	8	3	0	0	0	0	0	0	0	0	0	0	0	0	0	0	11	0	0	0	0	0
ASV_733	Basidiomycota	Tremellomycetes	Tremellales	Bulleribasidiaceae	Vishniacozyma	carnescens	0	0	0	0	0	0	0	0	0	0	0	0	0	0	0	0	0	0	0	0	0	17	3	0	0	0	0	0	0	0	0	0	0	0	0	0	0	0	0	5	0	5	0
ASV_734	Ascomycota	Sordariomycetes	Xylariales	Xylariales_fam_Incertae_sedis	Hansfordia	cubensis	0	0	0	0	0	0	0	0	0	0	0	0	0	0	0	0	0	0	0	0	0	0	0	0	0	0	0	0	0	0	0	0	0	0	0	0	0	0	0	3	0	0	0
ASV_738	Ascomycota	Dothideomycetes	Pleosporales	Didymellaceae	Neomicrosphaeropsis	tamaricicola	0	0	0	0	0	0	0	0	0	0	0	0	0	0	0	0	0	0	0	0	0	0	0	0	0	0	0	0	0	0	0	0	0	0	0	0	0	0	0	11	0	0	0
ASV_741	Ascomycota	Eurotiomycetes	Chaetothyriales	Trichomeriaceae	Trichomerium	eucalypti	0	0	0	0	0	0	0	0	0	0	0	0	0	14	0	1	0	0	0	5	0	0	0	0	0	0	0	0	0	0	0	0	0	0	0	0	0	0	0	0	0	0	0
ASV_742	Ascomycota	Dothideomycetes	Mycosphaerellales	Mycosphaerellaceae	Readeriella	tasmanica	0	0	0	0	0	0	0	0	0	30	0	0	3	0	0	0	0	0	0	0	0	0	0	0	0	0	0	0	0	0	0	0	0	0	0	0	0	0	0	0	0	0	0
ASV_745	Basidiomycota	Agaricomycetes	Agaricales	Inocybaceae	Inocybe	tenuicristatum	0	0	0	0	0	0	0	0	0	7	0	0	0	0	0	0	0	0	0	0	0	0	0	0	14	0	0	0	0	0	0	0	0	0	0	0	0	0	0	0	0	0	0
ASV_748	Ascomycota	Dothideomycetes	Pleosporales	Lophiotremataceae	Atrocalyx	nordicus	0	0	0	0	0	0	0	0	0	0	0	0	6	0	0	0	0	17	0	0	0	3	0	0	0	0	0	0	0	0	0	0	0	7	0	0	1	0	0	0	0	0	0
ASV_749	Ascomycota	Dothideomycetes	Mycosphaerellales	Mycosphaerellaceae	Mycosphaerellaceae_gen_Incertae_sedis	pseudoamericana	0	0	0	0	0	0	0	0	0	0	0	0	0	0	0	0	0	0	19	0	0	0	0	0	0	0	0	0	0	0	0	0	0	0	0	0	0	0	0	0	0	0	0
ASV_750	Basidiomycota	Microbotryomycetes	Leucosporidiales	Leucosporidiaceae	Leucosporidium	intermedium	0	0	0	0	0	0	0	0	0	0	0	0	0	0	0	0	0	0	0	0	0	0	0	0	0	0	0	0	0	0	0	0	0	0	0	0	0	0	0	0	0	0	0
ASV_752	Ascomycota	Dothideomycetes	Mycosphaerellales	Dissoconiaceae	Dissoconium	eucalypti	0	0	0	0	0	0	0	0	0	0	0	0	0	0	0	0	0	0	0	0	0	0	0	0	0	0	0	0	0	0	0	0	0	0	0	0	0	0	0	0	0	0	2
ASV_753	Ascomycota	Lecanoromycetes	Lecanorales	Catillariaceae	Catillaria	flexuosa	0	0	0	0	0	0	0	0	0	0	0	0	0	0	0	0	0	0	0	0	0	0	0	0	0	0	0	0	0	0	0	0	0	0	0	0	0	0	0	0	0	0	0
ASV_755	Ascomycota	Leotiomycetes	Leotiales	Tympanidaceae	Aotearoamyces	nothofagi	0	0	0	0	0	0	0	0	0	0	0	0	0	0	0	0	0	0	0	0	0	0	1	0	0	0	0	0	0	0	0	0	0	0	0	0	0	0	0	0	0	0	0
ASV_756	Basidiomycota	Tremellomycetes	Tremellales	Tremellaceae	Tremella	subalpina	0	0	0	0	0	0	0	0	0	0	0	0	0	0	0	0	0	0	0	0	0	0	0	0	0	0	0	0	0	0	0	0	0	0	0	0	0	0	0	0	0	0	0
ASV_757	Basidiomycota	Agaricomycetes	Auriculariales	Exidiaceae	Adustochaete	interrupta	0	0	0	0	0	0	0	0	0	0	0	0	0	0	0	0	0	0	0	0	0	0	0	0	0	0	0	0	0	0	0	0	0	0	0	0	0	0	0	0	0	0	2
ASV_763	Basidiomycota	Cystobasidiomycetes	Cystobasidiales	NA	NA	NA	0	0	0	0	0	0	0	0	0	0	0	0	0	0	0	0	0	0	0	0	0	0	0	0	0	0	0	0	0	0	0	0	0	0	0	0	0	0	0	0	0	0	0
ASV_766	Ascomycota	Dothideomycetes	Mycosphaerellales	Mycosphaerellaceae	Pseudocercospora	madagascariensis	0	0	0	0	0	0	0	0	0	0	0	0	0	0	0	0	0	0	0	0	0	0	0	0	0	0	0	0	0	0	0	0	0	0	0	0	0	0	0	0	0	0	3
ASV_767	Basidiomycota	Tremellomycetes	Filobasidiales	Filobasidiaceae	Filobasidium	globosum	0	0	0	0	0	0	0	0	0	0	0	0	0	0	0	0	0	0	0	0	0	0	0	0	0	0	0	0	0	0	0	0	0	0	0	0	0	0	0	0	0	0	0
ASV_768	Ascomycota	Dothideomycetes	Pleosporales	Pleosporales_fam_Incertae_sedis	Pleosporales_gen_Incertae_sedis	variabilis	0	32	0	0	0	0	0	0	0	21	0	0	0	0	0	0	0	0	0	0	0	0	0	0	0	0	0	0	0	0	0	0	0	0	0	0	0	0	0	0	0	0	0
ASV_772	Basidiomycota	Tremellomycetes	Tremellales	Phaeotremellaceae	Phaeotremella	eugeniae	0	0	0	0	0	0	0	0	0	0	0	0	0	0	0	0	0	0	0	2	0	0	0	0	0	0	0	0	0	0	2	0	0	0	0	0	0	0	0	2	0	0	0
ASV_773	Ascomycota	Dothideomycetes	Mycosphaerellales	Mycosphaerellaceae	Septoria	protearum	0	0	0	0	0	0	0	0	0	0	0	0	0	0	0	0	0	0	0	0	0	0	0	0	0	0	0	0	0	0	0	0	0	0	0	0	0	0	0	0	0	0	0
ASV_775	Basidiomycota	Cystobasidiomycetes	NA	NA	NA	NA	0	0	0	0	0	0	0	0	0	0	0	0	0	0	0	0	0	0	0	0	0	0	0	0	3	0	0	0	0	0	0	0	0	0	0	0	0	0	0	0	0	0	0
ASV_780	Ascomycota	Dothideomycetes	Mycosphaerellales	Teratosphaeriaceae	Neocatenulostroma	castaneae	0	0	0	0	0	0	0	0	0	0	0	0	0	0	0	0	0	0	0	0	0	13	0	0	0	0	0	0	0	0	0	0	0	0	0	0	0	5	0	0	0	0	0
ASV_781	Ascomycota	Dothideomycetes	Pleosporales	Cucurbitariaceae	Neocucurbitaria	vachelliae	0	0	0	0	0	0	0	0	0	0	0	0	0	0	0	0	0	0	0	0	0	0	0	0	0	0	14	1	0	0	0	0	0	0	0	0	0	0	0	0	0	0	0
ASV_782	Basidiomycota	Agaricomycetes	Russulales	Stereaceae	Acanthophysium	bisporum	0	0	0	0	0	0	0	0	0	0	0	0	0	0	0	0	0	0	0	0	0	0	0	0	0	0	0	0	0	0	0	0	0	0	0	0	0	0	0	0	0	0	0
ASV_789	Basidiomycota	Microbotryomycetes	Sporidiobolales	Sporidiobolaceae	Rhodotorula	babjevae	0	0	0	0	0	0	0	0	0	0	0	0	0	0	0	0	0	0	0	2	0	3	0	0	0	0	0	0	0	2	0	0	0	0	0	0	0	0	0	0	0	0	0
ASV_790	Basidiomycota	Agaricomycetes	Agaricales	Typhulaceae	Typhula	faginea	0	0	0	0	0	0	0	0	0	0	0	0	0	0	0	0	0	0	0	0	0	0	0	0	0	0	0	0	0	0	0	0	0	0	0	0	0	0	0	0	0	0	0
ASV_791	Basidiomycota	Tremellomycetes	Tremellales	Cuniculitremaceae	Fellomyces	horovitziae	0	0	0	0	0	0	0	0	0	0	0	0	0	0	0	0	0	0	0	0	0	0	0	0	0	0	0	0	0	0	0	0	0	0	0	0	0	0	0	0	0	0	0
ASV_792	Basidiomycota	Agaricomycetes	Russulales	Peniophoraceae	Peniophora	simulans	0	0	0	0	0	0	0	0	0	6	0	0	0	0	0	0	0	0	0	0	0	0	0	0	0	0	0	0	0	0	0	0	0	0	0	0	0	0	0	0	0	0	0
ASV_793	Ascomycota	Dothideomycetes	Pleosporales	Pleosporaceae	Curvularia	arcana	0	0	0	0	0	0	0	0	0	0	0	0	0	0	0	0	0	0	0	0	0	0	0	0	0	0	0	0	0	0	0	0	0	0	0	0	0	0	0	0	0	0	0
ASV_794	Basidiomycota	Agaricomycetes	Russulales	Peniophoraceae	Peniophora	molesta	0	0	0	0	0	0	0	0	0	0	0	0	0	0	0	0	0	0	0	0	0	0	0	0	0	0	0	0	0	0	0	0	0	0	0	0	0	0	0	0	0	0	0
ASV_798	Ascomycota	Eurotiomycetes	Eurotiales	Aspergillaceae	Penicillium	fuscoglaucum	0	0	0	0	0	0	0	0	0	0	0	0	0	0	0	0	0	0	0	0	0	0	0	0	0	0	0	0	0	0	0	0	0	0	0	0	0	0	0	0	0	0	0
ASV_799	Basidiomycota	Agaricostilbomycetes	Agaricostilbales	Kondoaceae	Kondoa	yuccicola	0	0	0	0	0	0	0	0	0	0	0	0	0	0	0	0	17	0	0	0	0	0	0	0	0	5	0	0	0	0	0	0	0	0	0	0	0	0	0	0	0	0	0
ASV_800	Ascomycota	Dothideomycetes	Mycosphaerellales	Teratosphaeriaceae	Phaeothecoidea	proteae	0	0	0	0	0	0	0	0	0	33	0	0	0	0	0	0	0	0	0	0	0	0	0	0	0	0	0	0	0	0	0	0	0	0	0	0	0	0	0	0	0	0	0
ASV_803	Basidiomycota	Tremellomycetes	Tremellales	Tremellales_fam_Incertae_sedis	Tremellales_gen_Incertae_sedis	tibetensis	0	0	0	0	0	0	0	0	0	0	0	0	11	0	0	0	0	0	0	0	0	0	0	0	0	0	0	0	0	0	0	0	0	0	0	7	0	0	0	0	0	0	0
ASV_804	Ascomycota	Dothideomycetes	Mycosphaerellales	Teratosphaeriaceae	Stenella	araguata	0	0	0	0	0	0	0	0	0	0	0	0	0	0	0	0	0	0	0	0	0	0	0	0	0	0	0	0	0	0	0	0	0	0	0	0	0	0	0	0	0	0	0
ASV_807	Ascomycota	Lecanoromycetes	Caliciales	Physciaceae	Physcia	occidentalis	0	0	0	0	0	0	0	0	0	0	0	0	0	0	0	0	0	0	0	0	0	0	0	0	0	0	0	0	0	0	0	0	0	0	0	0	0	0	0	0	0	0	0
ASV_809	Basidiomycota	Agaricomycetes	Cantharellales	Hydnaceae	Sistotrema	verzuoliana	0	0	0	0	0	0	0	0	0	0	0	0	0	0	0	0	0	0	0	0	0	0	0	0	0	0	0	0	0	0	0	0	0	0	0	0	0	0	0	0	0	0	0
ASV_810	Ascomycota	Dothideomycetes	Pleosporales	Thyridariaceae	Massariosphaeria	clematidis	0	0	0	0	0	0	0	0	0	0	0	0	0	0	0	0	0	0	0	0	0	0	0	0	0	0	0	0	0	0	0	0	0	0	0	0	0	0	0	0	0	0	0
ASV_812	Basidiomycota	Tremellomycetes	Tremellales	Bulleribasidiaceae	Vishniacozyma	melezitolytica	0	0	0	0	0	0	0	0	0	0	0	0	0	5	0	0	0	0	0	0	0	0	0	0	0	0	0	0	0	0	0	0	0	0	0	0	0	0	0	0	0	0	0
ASV_813	Ascomycota	Dothideomycetes	Dothideales	Saccotheciaceae	Pseudosydowia	louisecottisiae	0	0	0	0	0	0	0	0	0	0	0	0	0	0	0	0	0	0	0	0	0	0	0	0	0	0	0	0	0	0	0	0	0	0	0	0	0	0	0	0	0	0	0
ASV_817	Basidiomycota	Tremellomycetes	Tremellales	Bulleribasidiaceae	Dioszegia	hungarica	0	0	0	0	0	0	0	0	0	0	0	0	0	0	0	0	0	0	0	0	0	0	0	0	0	0	0	0	0	0	0	0	0	0	0	0	0	0	4	1	0	14	0
ASV_818	Ascomycota	Leotiomycetes	Helotiales	Helotiaceae	Hymenoscyphus	pusillus	0	0	0	0	0	0	0	0	0	0	0	0	0	0	0	0	0	0	0	0	0	0	0	0	0	0	0	0	0	0	0	0	0	0	0	0	0	0	0	0	0	0	0
ASV_826	Ascomycota	Leotiomycetes	Erysiphales	Erysiphaceae	Blumeria	centenaria	0	0	0	0	0	0	0	0	0	0	0	0	0	0	0	0	0	0	1	3	0	21	14	0	0	0	9	0	0	0	0	0	0	0	0	0	0	0	0	0	0	0	0
ASV_827	Fungi_phy_Incertae_sedis	Fungi_cls_Incertae_sedis	Fungi_ord_Incertae_sedis	Fungi_fam_Incertae_sedis	Fungi_gen_Incertae_sedis	Fungi_sp_incertae_sedi	0	0	0	0	0	0	0	7	0	0	0	0	0	0	0	0	0	0	0	0	0	0	0	0	0	0	0	0	0	0	0	0	0	0	0	0	0	0	0	0	0	0	0
ASV_828	Basidiomycota	Agaricomycetes	Polyporales	Fomitopsidaceae	Fomitopsis	subpinicola	27	0	0	0	0	0	0	0	0	0	0	0	0	0	0	18	0	0	0	0	0	0	0	0	0	0	0	0	0	0	0	0	0	0	0	0	0	0	0	0	0	0	0
ASV_831	Ascomycota	Dothideomycetes	Mycosphaerellales	Teratosphaeriaceae	Neocatenulostroma	castaneae	0	0	0	0	0	0	0	0	0	0	19	0	9	0	0	0	0	0	0	0	0	0	0	0	0	0	0	0	0	0	0	0	0	0	0	0	0	0	0	0	0	0	0
ASV_834	Basidiomycota	Microbotryomycetes	Sporidiobolales	Sporidiobolaceae	Sporobolomyces	roseus	0	0	0	0	0	2	0	0	0	0	0	0	0	0	0	0	0	0	0	0	0	0	0	0	0	0	0	0	0	4	0	0	0	0	0	0	0	0	0	0	0	0	0
ASV_835	Ascomycota	Leotiomycetes	Helotiales	Chaetomellaceae	Pilidium	acerinum	0	0	0	0	0	0	0	0	0	0	0	0	0	0	0	0	0	0	0	0	0	0	0	0	0	0	0	0	0	0	0	0	0	0	0	0	0	0	0	0	0	0	0
ASV_836	Ascomycota	Leotiomycetes	Erysiphales	Erysiphaceae	Blumeria	americana	0	0	0	0	0	0	0	0	0	0	5	0	0	2	0	4	0	0	0	0	0	0	0	0	0	0	0	0	0	0	0	0	0	0	0	0	0	0	0	0	0	0	0
ASV_839	Basidiomycota	Pucciniomycetes	Septobasidiales	Septobasidiaceae	Auriculoscypha	anacardiicola	0	0	0	0	0	0	0	0	0	0	0	0	0	0	0	0	0	0	0	0	0	0	0	0	0	0	0	0	0	0	0	0	0	0	0	0	0	0	0	0	0	0	0
ASV_840	Ascomycota	Dothideomycetes	Pleosporales	Pleosporales_fam_Incertae_sedis	Pleosporales_gen_Incertae_sedis	spribillei	0	0	0	0	0	0	0	0	0	0	0	0	0	0	0	0	0	0	0	0	0	0	0	0	15	0	0	0	0	0	0	0	0	0	0	0	0	0	0	0	0	0	0
ASV_841	Basidiomycota	Tremellomycetes	Cystofilobasidiales	Mrakiaceae	Krasilnikovozyma	fibulata	0	0	0	0	0	0	0	0	0	0	0	0	0	0	0	0	0	0	0	0	0	0	0	0	0	0	0	0	0	0	0	0	0	0	0	0	0	0	0	0	0	0	0
ASV_842	Ascomycota	Dothideomycetes	Capnodiales	Paradevriesiaceae	Paradevriesia	pseudoamericana	0	0	0	0	0	0	0	0	0	0	0	0	0	0	0	0	0	0	0	0	0	0	0	0	0	0	0	0	0	0	0	0	0	0	0	0	0	0	0	0	2	0	0
ASV_844	Ascomycota	Leotiomycetes	Helotiales	Sclerotiniaceae	Botryotinia	ranunculi	0	0	0	0	0	0	0	0	0	0	0	0	0	0	0	0	0	0	0	0	0	0	0	0	0	0	0	0	0	0	0	0	0	0	0	0	0	0	0	0	0	0	0
ASV_845	Ascomycota	Eurotiomycetes	Eurotiales	Aspergillaceae	Aspergillus	austwickii	0	0	0	0	0	0	0	0	0	0	0	0	0	0	0	0	0	0	0	0	0	0	0	0	0	0	0	0	0	0	0	0	0	0	0	0	0	0	0	0	0	0	0
ASV_847	Basidiomycota	Tremellomycetes	Tremellales	Bulleraceae	Fonsecazyma	korlaensis	0	0	0	0	0	0	0	0	0	0	0	0	0	0	0	6	0	0	0	0	0	0	0	0	0	0	0	0	0	0	0	0	0	0	0	0	0	0	0	0	0	0	0
ASV_849	Basidiomycota	Agaricomycetes	Agaricales	Tubariaceae	Tubaria	pallidissima	0	0	0	0	0	0	0	0	0	0	0	0	0	0	0	0	0	0	0	0	0	0	0	0	0	0	0	0	0	0	0	0	0	0	0	0	0	0	0	0	0	0	0
ASV_850	Ascomycota	Eurotiomycetes	Chaetothyriales	Herpotrichiellaceae	Herpotrichiellaceae_gen_Incertae_sedis	tectonae	0	0	0	0	0	0	0	0	0	0	0	0	0	0	0	0	0	0	0	0	0	0	0	0	0	0	0	0	0	0	0	0	0	0	0	0	0	0	0	0	0	0	0
ASV_852	Basidiomycota	Tremellomycetes	Tremellales	Tremellaceae	Tremella	subalpina	0	0	0	0	0	0	0	0	0	0	0	0	0	0	0	0	35	0	0	0	0	0	0	0	0	0	0	0	0	0	0	0	0	0	0	0	0	0	0	0	0	0	0
ASV_854	Ascomycota	Dothideomycetes	Capnodiales	Paradevriesiaceae	Paradevriesia	pseudoamericana	0	0	0	0	0	0	0	0	0	0	0	0	0	0	0	0	0	0	0	0	0	0	0	0	0	0	0	0	0	0	0	0	0	0	0	0	0	0	0	0	0	0	0
ASV_855	Ascomycota	Lecanoromycetes	Caliciales	Physciaceae	Physcia	rhizinata	0	0	0	0	0	0	0	0	0	0	35	0	0	0	0	0	0	0	0	0	0	0	0	0	0	0	0	0	0	0	0	0	0	0	0	0	0	0	0	0	0	0	0
ASV_862	Ascomycota	Dothideomycetes	Pleosporales	Phaeosphaeriaceae	Phaeosphaeria	phragmitis	0	0	0	0	0	0	0	0	0	0	0	0	0	0	0	0	0	6	0	0	0	0	0	0	0	0	0	0	0	0	0	0	0	0	0	0	0	0	0	0	0	0	0
ASV_863	Ascomycota	Leotiomycetes	Leotiales	Tympanidaceae	Aotearoamyces	nothofagi	0	0	0	0	0	0	0	0	0	0	0	4	0	0	0	0	0	0	0	0	0	0	0	0	0	0	0	0	0	0	0	0	0	0	0	0	0	0	0	0	0	0	0
ASV_866	Basidiomycota	Tremellomycetes	Tremellales	Bulleribasidiaceae	Dioszegia	rishiriensis	0	0	0	0	0	0	0	0	0	0	0	0	0	0	0	0	0	0	0	0	0	0	0	0	0	0	0	0	0	0	0	0	0	0	0	0	0	0	0	0	0	0	0
ASV_869	Ascomycota	Sordariomycetes	Xylariales	Diatrypaceae	Cryptovalsa	atlantica	0	0	0	0	0	0	0	0	0	6	0	0	8	0	0	0	0	0	0	0	0	0	0	0	0	0	0	0	0	0	0	0	0	1	0	0	0	3	0	1	0	0	1
ASV_875	Ascomycota	Dothideomycetes	Pleosporales	Phaeosphaeriaceae	Parastagonospora	forlicesenica	0	0	0	0	0	0	0	0	0	0	0	0	0	0	0	0	0	0	0	0	0	0	0	0	0	0	0	0	1	0	0	0	0	0	3	0	0	0	0	5	0	0	0
ASV_879	Basidiomycota	Tremellomycetes	Tremellales	Cuniculitremaceae	Kockovaella	mexicana	0	0	0	15	0	0	0	0	0	0	17	0	0	0	0	0	0	0	0	0	0	0	0	0	0	0	0	0	0	0	0	0	0	0	0	0	0	0	0	0	0	0	0
ASV_880	Ascomycota	Dothideomycetes	Mycosphaerellales	Mycosphaerellaceae	Acrodontium	neolitseae	0	0	0	0	0	0	0	0	0	0	0	0	0	0	0	0	0	0	5	0	0	0	0	0	0	0	0	0	0	0	0	0	0	0	0	0	0	0	0	0	0	0	0
ASV_885	Ascomycota	Dothideomycetes	Pleosporales	Didymellaceae	Neoascochyta	dactylidis	0	0	0	0	0	0	0	0	0	0	0	0	3	0	0	0	0	0	0	0	0	0	0	0	0	0	0	0	0	0	0	0	0	0	0	0	0	0	0	0	0	0	0
ASV_886	Basidiomycota	Cystobasidiomycetes	Erythrobasidiales	Erythrobasidiaceae	Erythrobasidium	elongatum	0	0	0	0	0	0	0	0	0	0	0	0	0	0	0	0	0	0	0	0	0	0	0	0	0	0	0	0	0	0	0	0	0	0	0	0	0	0	0	0	0	0	0
ASV_889	Basidiomycota	Tremellomycetes	Tremellales	Bulleribasidiaceae	Dioszegia	kandeliae	0	0	0	0	0	0	0	0	0	0	0	0	0	0	0	0	0	0	0	0	0	0	0	0	0	0	0	0	0	0	0	0	0	0	0	0	0	0	0	0	0	0	0
ASV_890	Basidiomycota	Tremellomycetes	Tremellales	Sirobasidiaceae	Fibulobasidium	inconspicuum	0	0	0	0	0	0	0	0	0	0	0	0	0	0	0	0	0	0	0	0	0	0	0	0	0	1	0	0	0	0	0	0	0	0	0	0	0	0	0	0	0	0	0
ASV_892	Ascomycota	Eurotiomycetes	Eurotiales	Aspergillaceae	Penicillium	bialowiezense	0	0	0	0	0	0	0	0	0	0	0	0	0	0	0	0	0	0	0	0	0	0	0	0	0	0	0	0	0	0	0	0	0	0	0	0	0	0	0	0	0	0	0
ASV_894	Ascomycota	Dothideomycetes	Pleosporales	Cucurbitariaceae	Parafenestella	alpina	0	0	0	0	0	0	0	0	0	0	0	0	0	0	0	0	0	0	0	0	0	0	0	0	0	0	0	0	0	0	0	0	0	0	0	0	0	0	0	0	0	0	0
ASV_895	Basidiomycota	Cystobasidiomycetes	Cystobasidiales	Cystobasidiaceae	Cystobasidium	laryngis	0	0	0	0	0	0	0	0	0	0	0	0	0	0	0	0	0	0	0	0	0	0	0	0	0	0	0	0	0	0	0	0	0	0	0	0	0	0	0	0	0	0	0
ASV_900	Basidiomycota	Agaricomycetes	Agaricales	Cortinariaceae	Cortinarius	borealis	0	0	0	0	0	0	0	0	0	0	34	0	0	0	0	7	0	0	0	0	0	0	0	0	0	0	0	0	0	0	0	0	0	0	0	0	0	0	0	0	0	0	0
ASV_901	Basidiomycota	Tremellomycetes	Tremellales	Sirobasidiaceae	Fibulobasidium	murrhardtense	0	0	0	0	0	0	0	0	0	0	0	0	0	0	0	0	0	0	0	0	0	0	0	0	0	0	0	0	0	0	9	0	0	0	0	0	0	0	0	0	0	0	0
ASV_907	Ascomycota	Eurotiomycetes	Chaetothyriales	Trichomeriaceae	Trichomeriaceae_gen_Incertae_sedis	flexuosum	0	0	0	0	0	0	0	0	0	0	0	0	0	35	0	0	0	0	0	2	0	0	0	0	0	0	0	0	0	0	0	0	0	0	0	0	0	0	0	0	0	0	0
ASV_914	Ascomycota	Dothideomycetes	Mycosphaerellales	Mycosphaerellaceae	Ramularia	vizellae	0	0	0	0	0	0	0	0	0	0	0	0	0	0	0	0	0	0	0	0	0	1	0	0	0	0	0	0	0	0	0	0	0	0	0	0	0	10	0	0	0	0	0
ASV_915	Ascomycota	Dothideomycetes	Mycosphaerellales	Mycosphaerellaceae	Cercospora	musigena	0	0	0	0	0	0	0	0	0	18	0	0	0	0	0	0	0	0	0	0	0	0	0	0	0	0	0	0	0	0	0	0	0	0	0	0	0	0	0	0	0	0	0
ASV_916	Ascomycota	Sordariomycetes	Glomerellales	Plectosphaerellaceae	Lectera	longa	0	0	0	0	0	0	0	0	0	0	0	0	0	0	0	0	0	0	0	0	0	0	0	0	0	0	0	0	0	0	0	0	0	0	0	0	0	0	0	0	0	0	0
ASV_919	Ascomycota	Dothideomycetes	Pleosporales	NA	NA	NA	0	0	0	0	0	0	0	0	0	36	0	0	0	0	0	0	0	0	0	0	0	0	0	0	0	0	4	0	0	0	0	0	0	0	0	0	0	0	0	0	0	0	0
ASV_921	Basidiomycota	Agaricomycetes	Auriculariales	Exidiaceae	Exidiopsis	interrupta	0	0	0	0	0	0	0	0	0	0	0	0	0	0	0	0	0	0	0	0	0	0	0	0	0	0	0	0	0	0	0	0	0	0	0	0	0	0	0	0	0	0	0
ASV_923	Ascomycota	Dothideomycetes	Mycosphaerellales	Teratosphaeriaceae	Lapidomyces	aloidendricola	0	0	0	0	0	0	0	0	0	0	0	0	0	0	0	0	0	0	0	0	0	0	0	0	0	0	0	0	2	0	0	0	0	0	0	0	0	0	0	0	0	0	0
ASV_928	Ascomycota	Sordariomycetes	Xylariales	Microdochiaceae	Microdochium	ratticaudae	0	0	0	0	0	0	0	0	0	0	0	0	0	0	0	0	0	0	0	0	0	0	0	0	0	0	0	0	0	0	0	0	0	0	0	0	0	4	0	0	0	0	0
ASV_930	Basidiomycota	Agaricomycetes	Agaricomycetes_ord_Incertae_sedis	Agaricomycetes_fam_Incertae_sedis	Agaricomycetes_gen_Incertae_sedis	sclerocystidiosus	0	0	0	0	0	0	0	0	0	0	0	0	0	0	0	0	0	0	0	0	0	0	0	0	0	0	0	0	0	0	0	0	0	0	0	0	0	0	0	0	0	0	0
ASV_941	Ascomycota	Leotiomycetes	Helotiales	Sclerotiniaceae	Botryotinia	ranunculi	0	0	0	0	0	0	0	0	0	0	0	0	0	0	0	0	0	0	0	0	0	0	0	0	0	0	0	0	3	0	17	0	8	0	0	0	0	0	0	0	0	0	0
ASV_944	Basidiomycota	Tremellomycetes	Filobasidiales	Filobasidiaceae	Filobasidium	globosum	0	0	0	0	0	0	0	0	0	0	0	0	0	0	0	15	0	0	0	1	0	0	0	0	0	0	0	0	0	0	0	0	0	0	0	0	0	0	0	0	0	0	0
ASV_948	Ascomycota	Dothideomycetes	Pleosporales	Pleosporales_fam_Incertae_sedis	Pleosporales_gen_Incertae_sedis	aloes	0	0	0	0	0	0	0	0	0	0	0	0	0	0	0	0	0	0	0	0	0	0	0	0	0	0	0	0	0	0	0	0	0	0	0	0	0	0	0	0	0	0	0
ASV_949	Ascomycota	Dothideomycetes	Pleosporales	Cucurbitariaceae	Neocucurbitaria	vachelliae	0	0	0	0	0	0	0	0	0	0	0	0	0	0	0	0	0	0	0	0	0	0	0	0	0	0	0	0	0	0	0	0	0	0	0	0	0	0	0	0	0	0	0
ASV_950	Basidiomycota	Agaricomycetes	Agaricales	Strophariaceae	Hypholoma	similis	0	0	0	0	0	0	0	0	0	0	0	0	0	0	0	0	0	0	0	0	0	0	0	0	0	0	0	0	0	0	0	0	0	0	0	0	0	0	0	0	0	0	0
ASV_957	Ascomycota	Eurotiomycetes	Chaetothyriales	Herpotrichiellaceae	Herpotrichiellaceae_gen_Incertae_sedis	oblongispora	0	0	0	0	0	0	6	0	0	0	0	0	0	0	0	0	0	0	0	0	0	0	0	0	0	0	0	0	0	0	0	0	0	0	0	0	0	0	0	0	0	0	0
ASV_958	Ascomycota	Saccharomycetes	Saccharomycetales	Debaryomycetaceae	Diutina	catenulata	0	0	0	0	0	0	0	0	0	0	0	0	0	0	0	0	0	0	0	0	0	0	0	0	0	0	0	0	0	0	0	0	0	0	0	0	0	0	0	0	0	0	0
ASV_964	Ascomycota	Dothideomycetes	Mycosphaerellales	Mycosphaerellaceae	Mycosphaerellaceae_gen_Incertae_sedis	neerlandica	0	0	0	0	0	0	0	0	0	0	0	0	0	0	0	0	0	0	0	0	0	0	0	0	0	0	0	0	0	0	0	0	0	0	0	0	0	0	0	0	0	0	0
ASV_965	Ascomycota	Dothideomycetes	Pleosporales	Cucurbitariaceae	Seltsamia	ulmi	0	0	0	0	0	0	0	0	0	0	0	30	0	0	0	0	0	0	0	0	0	0	0	0	0	0	0	0	0	0	0	0	0	0	0	0	0	0	0	0	0	0	0
ASV_966	Ascomycota	Lecanoromycetes	Lecanorales	Ramalinaceae	Lecania	dissimilis	0	0	0	0	0	0	0	0	0	0	0	0	0	0	0	0	0	0	0	0	0	0	0	0	0	0	0	0	0	0	0	0	0	13	0	0	0	0	0	0	0	0	0
ASV_971	Ascomycota	Eurotiomycetes	Eurotiomycetes_ord_Incertae_sedis	Eurotiomycetes_fam_Incertae_sedis	Eurotiomycetes_gen_Incertae_sedis	lobatum	0	0	0	0	0	0	0	0	0	0	0	0	0	0	0	0	0	0	0	0	0	0	0	0	0	0	0	0	0	0	0	0	0	0	0	0	0	0	0	0	0	0	0
ASV_972	Basidiomycota	Agaricomycetes	Agaricomycetes_ord_Incertae_sedis	Agaricomycetes_fam_Incertae_sedis	Agaricomycetes_gen_Incertae_sedis	bisporum	0	0	0	0	0	0	0	0	0	0	0	0	0	0	0	0	0	0	0	0	0	0	0	0	0	0	0	0	0	0	0	0	0	0	0	0	0	0	0	0	0	0	0
ASV_975	Basidiomycota	Agaricomycetes	Polyporales	Steccherinaceae	Geesterania	davidii	0	0	0	0	0	0	0	0	0	0	0	0	0	0	0	0	0	0	0	0	0	0	0	0	0	0	0	0	0	0	0	0	0	0	0	0	0	0	0	0	0	0	0
ASV_977	Basidiomycota	Cystobasidiomycetes	NA	NA	NA	NA	0	0	0	0	0	0	0	0	0	0	0	0	0	0	0	0	0	0	0	0	0	0	0	0	0	2	0	0	0	0	3	0	0	0	0	0	0	0	0	0	0	0	0
ASV_978	Basidiomycota	Tremellomycetes	Tremellales	Sirobasidiaceae	Fibulobasidium	murrhardtense	0	0	0	0	0	0	0	0	0	0	0	0	0	0	0	0	0	0	0	0	0	0	0	0	0	0	0	0	0	0	0	0	0	0	0	0	0	0	0	0	0	0	0
ASV_980	Zoopagomycota	NA	NA	NA	NA	NA	0	0	0	0	0	0	0	0	0	0	0	0	0	0	0	0	0	0	0	0	0	0	0	0	0	0	0	0	0	0	0	0	0	0	0	0	0	0	0	0	0	0	0
ASV_984	Ascomycota	Eurotiomycetes	Chaetothyriales	Chaetothyriales_fam_Incertae_sedis	Chaetothyriales_gen_Incertae_sedis	rosula	0	0	0	0	0	0	0	0	0	0	0	0	0	0	0	0	0	0	0	0	0	0	0	0	0	0	0	0	0	0	0	0	0	0	0	0	0	0	0	0	0	0	0
ASV_990	Basidiomycota	Agaricomycetes	Polyporales	Phanerochaetaceae	Bjerkandera	ecuadorensis	0	0	0	0	0	0	0	0	0	0	0	0	0	0	0	0	0	0	0	0	0	0	0	0	0	0	0	0	0	0	0	0	0	0	0	0	0	0	0	0	0	0	0
ASV_991	Ascomycota	Dothideomycetes	Pleosporales	Cucurbitariaceae	Neocucurbitaria	vachelliae	0	0	0	0	0	0	0	0	0	0	0	0	0	0	0	0	0	0	0	0	0	0	23	0	0	0	0	0	0	0	0	0	0	0	0	0	0	0	0	0	0	0	0
ASV_992	Basidiomycota	Agaricomycetes	Agaricales	Psathyrellaceae	Coprinellus	ovatus	0	0	0	0	0	0	0	0	0	0	0	0	0	0	0	0	0	0	0	0	0	0	0	0	0	0	0	0	0	0	0	0	0	0	0	0	0	0	0	0	0	0	0
ASV_993	Ascomycota	Dothideomycetes	Mycosphaerellales	Teratosphaeriaceae	Teratosphaeria	terminaliae	0	0	0	0	0	0	0	0	0	0	0	0	0	0	0	0	0	0	0	8	0	0	0	0	0	0	0	0	0	0	0	0	0	0	0	0	0	0	0	0	0	0	0
ASV_995	Ascomycota	Eurotiomycetes	Chaetothyriales	Herpotrichiellaceae	Cladophialophora	rubiginosa	0	0	0	0	0	0	0	0	0	15	0	0	0	0	0	0	0	0	0	0	0	0	0	0	0	0	0	0	0	0	0	0	0	0	0	0	0	0	0	0	0	0	0
ASV_996	Ascomycota	Eurotiomycetes	Chaetothyriales	Cyphellophoraceae	Cyphellophora	eucalypti	0	0	0	0	0	0	0	0	0	0	10	0	0	0	0	0	0	0	0	0	0	0	0	0	0	0	0	0	0	0	0	0	0	0	0	0	0	0	0	0	0	0	0
ASV_997	Basidiomycota	Agaricomycetes	Agaricales	Mycenaceae	Mycena	lumina	0	0	0	0	0	0	0	0	0	0	0	0	0	0	0	0	0	0	0	0	0	0	0	0	0	0	0	0	0	0	0	0	0	0	0	0	0	0	0	0	0	0	0
ASV_1003	Ascomycota	Candelariomycetes	Candelariales	Candelariaceae	Candelaria	maculata	0	0	0	0	0	0	0	0	0	0	0	0	0	0	0	0	0	0	0	0	0	0	0	0	0	0	9	0	0	0	0	0	0	0	0	0	0	0	0	0	0	0	0
ASV_1004	Ascomycota	Sordariomycetes	Myrmecridiales	Myrmecridiaceae	Neomyrmecridium	sorbicola	20	0	0	0	0	0	0	0	0	0	0	0	0	0	0	0	0	0	0	0	0	0	0	0	0	0	0	0	0	0	0	0	0	0	0	0	0	0	0	0	0	0	0
ASV_1006	Ascomycota	Dothideomycetes	Pleosporales	Periconiaceae	Periconia	neobrittanica	0	0	0	0	0	0	0	0	0	0	0	0	0	0	0	0	0	0	0	0	0	0	0	0	0	0	0	0	0	0	0	0	0	0	0	0	0	0	0	0	0	0	0
ASV_1008	Ascomycota	Sordariomycetes	Xylariales	NA	NA	NA	0	0	0	0	0	0	0	0	0	0	0	0	0	0	0	0	0	0	0	0	0	0	0	0	0	0	0	0	0	0	0	0	0	0	0	0	0	0	0	0	0	0	0
ASV_1012	Ascomycota	Leotiomycetes	Helotiales	Dermateaceae	Calloria	minima	0	0	0	0	0	0	0	0	0	0	0	0	0	0	0	0	0	0	0	0	0	0	0	0	0	0	0	0	0	0	0	0	0	0	0	0	0	0	0	0	0	0	0
ASV_1016	Basidiomycota	Agaricomycetes	Polyporales	Meruliaceae	Phlebia	semisupina	0	0	0	0	0	0	0	0	0	0	0	0	0	0	0	0	0	0	0	0	0	0	0	0	0	0	0	0	0	0	0	0	0	0	0	0	0	0	0	0	0	0	0
ASV_1017	Basidiomycota	Agaricomycetes	Auriculariales	Hyaloriaceae	Protomerulius	pertusus	0	0	0	0	0	0	0	0	0	0	0	0	0	1	0	0	0	0	0	0	0	0	6	0	0	0	0	0	0	0	0	0	0	0	0	0	0	0	0	0	0	0	0
ASV_1018	Ascomycota	Sordariomycetes	Microascales	Microascales_fam_Incertae_sedis	Microascales_gen_Incertae_sedis	penicillata	0	0	0	0	0	0	0	0	0	0	0	0	0	0	0	0	0	0	0	0	0	0	0	0	0	0	0	0	0	0	0	0	0	0	0	0	0	0	0	0	0	0	0
ASV_1024	Ascomycota	Sordariomycetes	Sordariales	Chaetomiaceae	Botryotrichum	domesticum	0	0	0	0	0	0	0	0	0	0	0	0	0	0	0	0	0	0	0	0	0	0	0	0	0	0	0	0	0	0	0	0	0	0	0	0	0	0	0	0	0	0	0
ASV_1025	Ascomycota	Dothideomycetes	Pleosporales	Massarinaceae	Helminthosporium	tiliae	0	0	0	0	0	0	0	0	0	0	0	0	0	0	0	0	0	0	0	7	0	0	0	0	0	0	0	0	0	0	0	0	0	0	0	0	0	0	0	0	0	0	0
ASV_1026	Ascomycota	Eurotiomycetes	Chaetothyriales	Trichomeriaceae	Knufia	perforans	0	0	0	0	0	0	0	0	0	0	0	0	0	0	0	0	0	0	0	1	0	0	0	0	0	0	0	0	0	0	0	0	0	0	0	0	0	0	0	0	0	0	0
ASV_1033	Ascomycota	Sordariomycetes	Xylariales	Microdochiaceae	Microdochium	ratticaudae	0	0	0	0	0	0	0	0	0	0	0	0	0	0	0	0	0	0	0	0	0	4	0	0	0	0	0	0	3	0	0	0	0	0	0	0	14	0	0	0	0	4	0
ASV_1034	Basidiomycota	Tremellomycetes	Tremellales	Bulleribasidiaceae	Vishniacozyma	victoriae	0	0	0	0	0	0	0	0	0	0	0	0	0	0	0	0	0	0	0	0	0	1	0	0	0	0	0	0	0	0	0	0	0	0	0	0	0	3	8	0	0	0	16
ASV_1037	Ascomycota	Eurotiomycetes	Eurotiales	Aspergillaceae	Penicillium	citreosulfuratum	0	0	0	0	0	0	0	0	0	0	0	0	1	0	0	0	0	0	0	0	0	0	0	0	0	0	0	0	0	0	0	0	0	0	0	0	0	0	0	0	0	0	0
ASV_1046	Ascomycota	Dothideomycetes	Mycosphaerellales	Teratosphaeriaceae	Neocatenulostroma	abietis	0	0	0	0	0	0	0	0	0	0	0	0	0	0	0	18	0	0	0	0	0	0	0	0	0	0	0	0	0	0	0	12	0	0	0	0	0	0	0	0	0	0	0
ASV_1047	Basidiomycota	Tremellomycetes	Tremellales	Cuniculitremaceae	Kockovaella	haikouensis	0	0	0	0	0	0	0	0	0	0	0	0	0	0	0	17	0	0	0	0	0	0	0	0	0	0	0	0	0	0	13	0	0	0	0	0	0	0	0	0	0	0	0
ASV_1048	Basidiomycota	Agaricomycetes	Hymenochaetales	Hymenochaetaceae	Fuscoporia	australiana	0	0	0	0	0	0	0	0	0	0	0	0	0	0	0	1	0	0	0	0	0	0	0	0	0	0	0	0	0	0	0	0	0	2	0	0	0	0	0	3	0	0	0
ASV_1049	NA	NA	NA	NA	NA	NA	0	0	0	0	0	0	0	0	0	0	0	0	0	0	0	0	0	0	0	0	0	0	8	0	3	0	0	0	0	0	0	0	0	0	0	0	0	0	0	0	0	8	0
ASV_1054	Ascomycota	Dothideomycetes	Pleosporales	Cucurbitariaceae	Pyrenochaeta	ulmi	0	0	0	0	0	0	0	0	0	0	0	0	0	0	0	0	0	0	0	0	0	0	0	0	0	0	0	0	0	0	0	0	0	0	0	0	0	0	0	0	0	0	0
ASV_1057	Fungi_phy_Incertae_sedis	Fungi_cls_Incertae_sedis	Fungi_ord_Incertae_sedis	Fungi_fam_Incertae_sedis	Fungi_gen_Incertae_sedis	Fungi_sp_incertae_sedi	0	0	0	0	0	0	0	0	0	0	0	12	0	0	0	0	0	0	0	0	0	0	0	0	0	2	4	0	0	0	0	0	0	0	0	0	0	0	0	0	0	0	0
ASV_1060	Ascomycota	Eurotiomycetes	Chaetothyriales	Cyphellophoraceae	Cyphellophora	eucalypti	0	0	0	0	0	0	0	0	0	0	0	0	0	0	0	0	0	3	0	0	0	0	0	0	0	0	0	0	0	0	0	0	0	0	0	0	0	0	0	0	0	0	0
ASV_1062	Ascomycota	Ascomycota_cls_Incertae_sedis	Ascomycota_ord_Incertae_sedis	Ascomycota_fam_Incertae_sedis	Ascomycota_gen_Incertae_sedis	ericicola	0	0	0	0	0	0	0	0	0	0	0	0	0	0	0	0	26	0	0	0	0	0	0	0	0	0	0	0	0	0	0	0	0	0	0	0	0	0	0	0	0	0	0
ASV_1063	Fungi_phy_Incertae_sedis	Fungi_cls_Incertae_sedis	Fungi_ord_Incertae_sedis	Fungi_fam_Incertae_sedis	Fungi_gen_Incertae_sedis	Fungi_sp_incertae_sedi	0	0	0	0	0	0	0	0	0	4	0	0	0	0	0	0	0	0	0	0	0	0	0	0	0	0	0	0	0	0	0	1	0	0	0	0	0	0	0	0	0	0	0
ASV_1065	Ascomycota	Eurotiomycetes	Eurotiales	Trichocomaceae	Thermomyces	lanuginosus	0	0	0	0	0	12	0	0	0	0	0	0	0	0	0	0	0	0	0	0	0	0	0	0	0	0	0	0	0	0	0	0	0	0	0	0	0	0	0	0	0	0	0
ASV_1069	Basidiomycota	Cystobasidiomycetes	NA	NA	NA	NA	0	0	0	0	0	0	0	0	0	0	0	0	0	0	0	0	0	0	0	0	0	0	0	0	0	0	0	0	0	0	0	0	0	0	0	0	0	0	0	0	0	0	0
ASV_1070	Basidiomycota	Agaricomycetes	NA	NA	NA	NA	0	0	0	0	0	0	0	0	0	0	0	0	0	0	0	0	0	0	0	0	0	0	0	0	0	0	0	0	0	0	0	0	0	0	0	0	0	0	0	0	0	0	0
ASV_1076	Basidiomycota	Agaricomycetes	Agaricomycetes_ord_Incertae_sedis	Agaricomycetes_fam_Incertae_sedis	Agaricomycetes_gen_Incertae_sedis	brunneocystidiata	0	0	0	0	0	0	0	0	0	0	0	0	0	0	0	0	0	0	0	0	0	0	0	0	0	0	0	0	0	0	0	0	0	0	0	0	0	0	0	0	0	0	0
ASV_1077	Ascomycota	Dothideomycetes	Mycosphaerellales	Mycosphaerellaceae	Ramularia	collo-cygni	0	0	0	0	0	0	0	0	0	0	0	0	0	0	0	0	0	0	0	0	0	0	0	0	0	0	0	0	0	0	3	3	0	0	0	0	0	0	0	0	0	0	0
ASV_1078	Ascomycota	Eurotiomycetes	Chaetothyriales	Herpotrichiellaceae	Herpotrichiellaceae_gen_Incertae_sedis	gahniae	0	0	0	0	0	0	0	0	0	0	0	0	0	0	0	0	0	0	0	0	2	0	0	0	0	0	0	0	0	0	0	0	0	0	0	0	0	4	0	0	0	1	1
ASV_1081	Ascomycota	Lecanoromycetes	Lecanorales	Scoliciosporaceae	Scoliciosporum	lueckingii	0	0	0	0	3	0	0	0	0	0	0	0	0	0	0	0	0	0	0	0	0	0	0	0	0	0	0	0	0	0	0	0	0	0	0	0	0	0	0	0	0	0	0
ASV_1082	Ascomycota	Sordariomycetes	Cephalothecales	Cephalothecaceae	Phialemonium	inflatum	0	0	0	0	0	0	0	0	0	11	0	0	0	0	0	0	0	0	0	0	0	0	0	0	0	0	0	0	0	0	0	0	0	0	0	0	0	0	0	0	0	0	0
ASV_1093	Basidiomycota	Agaricomycetes	Auriculariales	Hyaloriaceae	Protomerulius	pertusus	0	0	0	0	0	0	0	0	0	0	0	0	0	2	0	0	0	0	0	0	0	0	0	0	0	0	0	0	0	0	0	0	0	0	0	0	1	0	0	0	0	0	0
ASV_1095	Basidiomycota	Agaricomycetes	Russulales	Russulaceae	Lactifluus	volemus	0	0	0	0	0	0	0	0	0	2	0	0	13	0	0	0	0	0	0	0	0	0	12	0	0	0	0	0	0	0	0	0	0	0	0	0	0	0	0	0	0	0	0
ASV_1098	Ascomycota	Sordariomycetes	Hypocreales	Nectriaceae	Fusarium	ruscicola	0	0	0	0	0	0	0	0	0	0	0	0	0	0	0	0	0	0	0	0	0	0	0	0	0	0	0	0	0	0	0	0	0	0	0	0	0	0	0	0	0	0	0
ASV_1100	Basidiomycota	Tremellomycetes	Holtermanniales	NA	NA	NA	0	0	0	0	0	0	0	0	0	0	0	0	0	0	0	0	0	0	0	0	0	0	0	0	0	0	0	0	0	0	0	0	0	0	0	0	0	0	0	12	0	0	0
ASV_1104	Ascomycota	Dothideomycetes	Pleosporales	Cucurbitariaceae	Parafenestella	tetratrupha	0	0	0	0	0	0	0	0	0	0	0	0	0	0	0	0	0	0	0	0	0	0	0	0	0	0	0	0	0	0	0	0	0	0	0	0	0	0	0	0	0	0	0
ASV_1105	Basidiomycota	Cystobasidiomycetes	NA	NA	NA	NA	0	0	0	0	0	0	0	0	0	0	0	0	0	0	0	0	0	0	0	0	0	0	0	0	0	0	0	0	0	0	0	0	0	0	0	0	0	0	0	0	0	0	0
ASV_1106	Basidiomycota	Agaricomycetes	Hymenochaetales	Rickenellaceae	Resinicium	rimulosum	0	0	0	0	0	0	0	0	0	0	0	0	0	0	0	0	0	0	0	0	0	0	0	0	0	0	0	0	0	0	0	0	0	0	0	0	0	0	0	0	0	0	0
ASV_1111	Basidiomycota	Tremellomycetes	Filobasidiales	Filobasidiaceae	Naganishia	albida	0	0	0	0	0	0	0	0	0	0	0	0	1	0	0	0	0	0	0	0	0	2	0	0	0	0	0	0	0	0	0	0	0	0	0	0	0	0	0	0	0	0	0
ASV_1112	Basidiomycota	Tremellomycetes	Tremellales	Rhynchogastremataceae	Papiliotrema	wisconsinensis	0	0	0	0	0	3	0	0	0	0	0	0	0	0	0	0	0	0	0	0	0	2	0	0	0	0	0	0	1	0	0	0	0	5	0	0	0	0	0	0	0	0	0
ASV_1113	Basidiomycota	Agaricomycetes	Polyporales	Fomitopsidaceae	Fomitopsidaceae_gen_Incertae_sedis	subpinicola	0	0	0	0	0	0	0	0	0	0	0	0	0	0	0	0	0	0	0	0	0	0	0	0	0	0	0	0	0	0	0	0	0	0	0	0	0	0	0	0	0	0	0
ASV_1114	Ascomycota	Dothideomycetes	Pleosporales	Didymellaceae	Neoascochyta	dactylidis	0	0	0	0	0	0	0	0	0	0	0	0	0	0	0	0	0	0	0	0	0	0	0	0	0	0	0	0	0	0	0	0	0	0	0	0	0	10	0	0	0	0	0
ASV_1115	Basidiomycota	Agaricomycetes	Polyporales	Hyphodermataceae	Hyphoderma	longisterigmata	0	0	0	0	0	0	0	0	0	0	0	0	0	0	0	0	0	0	0	0	0	0	0	0	0	0	0	0	0	0	0	0	0	0	0	0	0	0	0	0	0	0	0
ASV_1116	Ascomycota	Sordariomycetes	Sordariales	Chaetomiaceae	Humicola	nigrescens	0	0	0	0	0	0	0	0	0	0	0	0	0	0	0	7	0	0	0	0	0	0	0	0	0	0	0	0	0	0	0	0	0	0	0	0	0	0	0	0	0	0	0
ASV_1117	NA	NA	NA	NA	NA	NA	0	0	0	0	0	0	0	0	0	0	0	0	0	0	0	0	0	0	0	0	0	0	19	0	0	0	0	0	0	0	0	0	0	0	0	0	0	0	0	0	0	0	0
ASV_1118	Ascomycota	Dothideomycetes	Pleosporales	Periconiaceae	Periconia	verrucosa	0	0	0	0	0	0	0	0	0	0	0	0	0	0	0	0	0	0	0	0	0	0	0	0	0	0	0	0	0	0	0	0	0	0	0	0	0	0	0	0	0	0	0
ASV_1119	Ascomycota	Dothideomycetes	Mycosphaerellales	Neodevriesiaceae	Neodevriesia	fraserae	0	0	0	0	0	0	0	0	0	0	0	0	0	0	0	0	0	0	0	0	0	0	0	0	0	0	0	0	0	0	0	0	0	0	0	0	0	0	0	0	0	0	0
ASV_1126	Ascomycota	Leotiomycetes	Erysiphales	Erysiphaceae	Blumeria	americana	0	0	0	0	0	0	0	0	0	0	0	11	0	0	0	0	0	0	0	0	0	0	0	0	0	0	0	0	0	0	0	0	0	0	0	0	0	0	0	0	0	0	0
ASV_1132	Ascomycota	Dothideomycetes	Myriangiales	Myriangiaceae	Anhellia	nectandrae	0	0	0	0	0	0	0	0	0	0	0	0	0	7	0	0	0	0	0	0	0	0	0	0	0	0	0	0	0	0	0	0	0	0	0	0	0	0	0	0	0	0	0
ASV_1133	Ascomycota	Eurotiomycetes	Chaetothyriales	Herpotrichiellaceae	Exophiala	xenobiotica	0	0	0	0	0	0	0	0	0	0	0	0	0	0	0	0	0	0	0	0	0	0	0	0	0	0	0	0	0	0	0	0	0	0	0	2	0	0	0	0	0	0	0
ASV_1139	Basidiomycota	Agaricomycetes	Russulales	Russulaceae	Lactifluus	volemus	0	0	0	0	0	0	0	0	0	0	0	0	2	0	0	6	0	0	0	0	0	17	0	0	0	0	0	0	0	0	0	0	0	0	0	0	0	0	0	0	0	0	0
ASV_1143	Ascomycota	Leotiomycetes	Helotiales	Helotiaceae	Hymenoscyphus	pusillus	0	0	0	0	0	0	0	0	0	0	0	0	0	0	0	0	0	0	0	0	0	0	0	0	0	0	0	0	0	0	0	0	0	0	0	0	0	0	0	0	0	0	0
ASV_1156	Basidiomycota	Agaricomycetes	Hymenochaetales	Schizoporaceae	Hyphodontia	attenuatus	0	0	0	0	0	0	0	0	0	0	0	0	0	0	0	0	0	0	0	0	0	0	0	0	0	0	0	0	0	0	0	0	0	0	0	0	0	0	0	0	0	0	0
ASV_1157	Ascomycota	Dothideomycetes	Pleosporales	Periconiaceae	Periconia	verrucosa	0	0	0	0	0	0	0	0	0	0	0	0	0	0	0	0	0	0	0	4	0	0	2	0	0	0	0	0	0	0	0	0	0	0	0	0	0	0	0	0	0	0	0
ASV_1159	Ascomycota	Dothideomycetes	Capnodiales	Capnodiales_fam_Incertae_sedis	Capnodiales_gen_Incertae_sedis	terminaliae	0	0	0	0	0	0	0	0	0	14	0	0	0	0	0	0	0	0	0	0	0	0	0	0	0	0	0	0	0	0	0	0	0	0	0	0	0	0	0	0	0	0	0
ASV_1160	Basidiomycota	Agaricomycetes	NA	NA	NA	NA	0	0	0	0	0	0	0	0	0	0	6	0	0	0	0	0	0	0	0	0	0	0	0	0	0	0	0	0	0	0	0	0	0	0	0	0	0	0	0	0	0	0	0
ASV_1171	Basidiomycota	Agaricomycetes	Agaricales	Tricholomataceae	Tricholomataceae_gen_Incertae_sedis	brunneocaperata	0	0	0	0	0	0	0	0	0	0	0	0	0	0	0	0	0	0	0	0	0	0	0	0	0	0	0	0	0	0	0	0	0	0	0	0	0	0	0	0	0	0	0
ASV_1173	Basidiomycota	Agaricomycetes	Auriculariales	Auriculariaceae	Auricularia	orientalis	0	0	0	2	0	0	0	0	0	4	0	0	0	0	0	0	0	0	0	0	0	0	0	0	11	0	0	0	0	0	0	0	0	0	0	0	0	0	0	0	6	0	0
ASV_1175	Ascomycota	Lecanoromycetes	Lecanorales	Parmeliaceae	Melanelixia	pseudocolpota	0	0	0	0	0	0	0	0	0	0	0	0	0	0	0	0	0	0	0	0	0	0	0	0	0	0	0	0	0	0	0	0	0	0	0	0	0	0	0	0	0	0	0
ASV_1176	Basidiomycota	Tremellomycetes	Tremellales	Bulleribasidiaceae	Dioszegia	crocea	0	0	0	0	0	0	0	0	0	0	0	0	0	0	0	0	0	0	0	0	0	0	0	0	0	0	0	0	0	0	0	0	0	0	0	0	0	0	0	0	0	0	0
ASV_1186	Basidiomycota	Tremellomycetes	Tremellales	Cryptococcaceae	Kwoniella	shivajii	0	0	0	0	0	0	0	0	0	0	0	0	0	0	0	0	0	0	0	0	0	3	0	0	0	0	0	0	0	0	0	0	0	0	0	0	0	0	0	0	0	0	1
ASV_1189	Basidiomycota	Agaricomycetes	Cantharellales	Hydnaceae	Sistotrema	verzuoliana	0	0	0	0	0	0	0	0	0	0	0	0	0	0	0	0	0	0	0	0	0	0	0	0	0	0	0	0	0	0	0	0	0	0	0	0	0	0	0	0	0	0	0
ASV_1195	Basidiomycota	Malasseziomycetes	Malasseziales	Malasseziaceae	Malasseziaceae_gen_Incertae_sedis	globosa	0	0	0	0	0	0	0	0	0	0	0	0	0	0	0	0	0	0	0	0	0	0	0	0	0	0	0	4	0	0	0	0	0	0	0	0	0	0	0	0	0	0	0
ASV_1197	Ascomycota	Dothideomycetes	Pleosporales	Cucurbitariaceae	Neocucurbitaria	vachelliae	0	0	0	0	0	0	0	0	0	0	0	0	0	0	0	0	0	0	0	0	0	0	0	0	0	0	0	0	0	0	0	0	0	0	0	0	0	0	0	0	0	0	0
ASV_1206	Basidiomycota	Agaricostilbomycetes	Agaricostilbales	Kondoaceae	Kondoa	foliicola	0	0	0	0	0	0	0	0	0	0	0	0	0	0	0	0	0	0	0	0	0	0	0	0	0	0	0	0	0	0	0	0	0	0	0	0	0	0	0	0	0	0	0
ASV_1210	Ascomycota	Dothideomycetes	Pleosporales	Didymellaceae	Ascochyta	phacae	0	0	0	0	0	0	0	0	0	0	0	0	0	0	0	0	0	0	0	0	0	0	0	0	0	0	0	0	0	0	0	0	0	0	0	0	0	0	0	0	0	0	0
ASV_1217	Ascomycota	Sordariomycetes	Hypocreales	Hypocreales_fam_Incertae_sedis	Barbatosphaeria	truncata	0	0	0	0	0	0	0	0	0	0	0	0	0	0	0	0	0	0	0	0	0	0	0	0	0	0	0	0	0	0	0	0	0	0	0	0	0	0	0	0	0	0	0
ASV_1224	Ascomycota	Dothideomycetes	Pleosporales	Phaeosphaeriaceae	Parastagonospora	forlicesenica	0	0	0	0	0	0	0	0	0	0	0	0	0	0	0	0	0	0	0	0	0	0	0	0	0	0	0	0	0	0	0	0	0	0	0	0	0	0	0	0	0	0	0
ASV_1229	Ascomycota	Dothideomycetes	Pleosporales	Melanommataceae	Alpinaria	rhododendri	0	0	0	0	0	0	0	0	0	0	0	0	3	0	0	0	0	0	0	0	0	5	0	0	0	0	0	0	0	0	0	0	0	0	0	0	0	0	0	0	0	0	0
ASV_1230	Ascomycota	Sordariomycetes	Diaporthales	Harknessiaceae	Harknessia	ellipsoidea	0	0	0	0	0	0	0	0	0	0	0	0	0	0	0	0	0	0	0	0	0	0	8	0	0	0	0	0	0	0	0	0	0	0	0	0	0	2	0	0	0	0	0
ASV_1231	Ascomycota	Dothideomycetes	Mycosphaerellales	Neodevriesiaceae	Neodevriesia	fraserae	0	0	0	0	0	0	0	0	0	0	0	0	0	0	0	0	0	0	0	0	0	0	7	0	0	0	0	0	0	0	0	0	0	0	0	0	0	0	0	0	0	0	0
ASV_1236	Ascomycota	Dothideomycetes	Pleosporales	Pleosporales_fam_Incertae_sedis	Pleosporales_gen_Incertae_sedis	aloes	6	0	0	0	0	0	0	0	0	0	0	0	0	0	0	0	0	0	0	0	0	0	0	0	0	0	0	0	0	0	0	0	0	0	4	0	0	0	0	0	0	0	0
ASV_1238	Ascomycota	Saccharomycetes	Saccharomycetales	Dipodascaceae	Geotrichum	silvicola	0	0	0	0	0	0	0	0	0	0	0	0	0	0	0	0	0	0	0	0	0	0	0	0	0	0	0	0	0	0	0	0	0	0	0	0	0	0	0	0	0	0	0
ASV_1239	Fungi_phy_Incertae_sedis	Fungi_cls_Incertae_sedis	Fungi_ord_Incertae_sedis	Fungi_fam_Incertae_sedis	Fungi_gen_Incertae_sedis	Fungi_sp_incertae_sedi	0	0	0	0	0	0	0	0	0	0	0	0	0	0	0	0	0	0	0	0	0	0	0	0	0	0	0	0	0	0	0	0	0	0	0	0	0	0	0	0	0	0	0
ASV_1240	Ascomycota	Dothideomycetes	Pleosporales	Cucurbitariaceae	Fenestella	parafenestrata	0	0	0	0	0	0	0	0	0	5	4	2	4	2	0	0	0	3	0	0	0	0	0	0	0	0	0	0	0	0	0	0	0	0	0	0	0	0	0	0	0	0	0
ASV_1244	Basidiomycota	Tremellomycetes	Tremellales	Bulleraceae	Genolevuria	amylolytica	0	0	0	0	0	0	0	0	0	0	0	0	0	0	0	0	0	0	0	0	0	0	0	0	10	0	0	0	0	0	0	0	0	0	0	0	0	0	0	0	0	0	0
ASV_1248	Ascomycota	Leotiomycetes	Helotiales	Helotiales_fam_Incertae_sedis	Helotiales_gen_Incertae_sedis	betulae	0	0	0	0	0	0	0	0	0	0	0	2	0	1	0	0	0	0	0	0	6	0	0	0	0	0	0	0	0	0	0	0	0	0	0	0	0	0	0	0	0	0	0
ASV_1250	Basidiomycota	Agaricomycetes	Polyporales	Meruliaceae	Ceriporiopsis	kunmingensis	0	0	0	0	0	0	0	0	0	0	0	0	0	0	0	0	0	0	0	0	0	0	0	0	0	0	0	0	0	0	0	0	0	0	0	0	0	0	0	0	0	0	0
ASV_1254	Basidiomycota	Tremellomycetes	Trichosporonales	Trichosporonaceae	Pascua	guehoae	0	0	0	0	0	0	0	0	0	0	0	0	0	0	0	0	0	0	0	0	0	0	0	0	0	0	0	0	6	0	0	0	0	0	0	0	0	0	0	0	0	0	0
ASV_1256	Basidiomycota	Tremellomycetes	Tremellales	Bulleraceae	Pseudotremella	moriformis	0	0	0	0	0	0	0	0	0	0	0	0	0	0	0	0	0	0	0	0	0	0	0	0	0	0	0	0	0	0	0	0	0	0	0	0	0	0	0	0	0	0	0
ASV_1263	Ascomycota	Eurotiomycetes	Eurotiales	Aspergillaceae	Penicillium	fusisporum	0	0	0	0	0	0	0	0	0	4	0	0	0	0	0	0	0	0	0	0	0	0	0	0	0	0	0	4	0	0	0	0	0	0	0	0	0	0	0	0	0	0	0
ASV_1264	Basidiomycota	Cystobasidiomycetes	Erythrobasidiales	Erythrobasidiaceae	Erythrobasidium	yunnanense	0	0	0	0	0	0	0	0	0	0	0	0	0	0	0	0	0	0	0	0	0	0	0	0	0	0	0	0	0	0	0	0	0	0	0	0	0	0	0	0	0	0	0
ASV_1267	Ascomycota	Sordariomycetes	Hypocreales	Nectriaceae	Microcera	rubra	0	0	0	0	0	0	0	0	0	0	0	0	0	0	0	0	0	0	0	0	0	0	0	0	0	0	0	0	0	0	5	0	0	0	0	0	0	0	0	0	0	0	0
ASV_1273	Ascomycota	Dothideomycetes	Pleosporales	Didymosphaeriaceae	Paraphaeosphaeria	michotii	0	0	0	0	0	0	0	0	0	6	0	0	0	0	0	0	0	0	0	0	0	0	0	0	0	0	0	0	0	0	0	0	0	0	0	0	0	0	0	0	0	0	0
ASV_1281	Basidiomycota	Cystobasidiomycetes	Cystobasidiales	Cystobasidiaceae	Cystobasidium	raffinophilum	0	0	0	0	0	0	0	0	0	0	0	0	0	0	0	0	0	0	0	0	0	0	0	0	0	0	0	0	0	0	0	0	0	0	0	0	0	0	0	0	0	0	0
ASV_1301	Basidiomycota	Cystobasidiomycetes	Cystobasidiomycetes_ord_Incertae_sedis	Buckleyzymaceae	Buckleyzyma	aurantiaca	0	0	0	0	0	0	0	0	0	0	0	0	0	0	0	0	0	0	0	0	0	0	6	0	0	0	0	0	0	0	0	0	0	0	0	0	0	0	0	0	0	0	0
ASV_1302	Ascomycota	Sordariomycetes	Xylariales	Sporocadaceae	Xenoseimatosporium	quercinum	0	0	0	0	0	0	0	0	0	0	0	0	0	0	0	0	0	0	0	0	0	0	0	0	0	0	0	0	0	0	0	0	0	0	0	0	0	0	0	0	0	0	0
ASV_1303	Ascomycota	Sordariomycetes	Hypocreales	Bionectriaceae	Geosmithia	microcorthyli	0	0	0	0	0	0	0	0	0	0	0	0	0	0	0	0	0	0	0	0	0	0	0	0	0	0	0	0	0	0	0	0	0	0	0	0	0	0	0	0	0	0	0
ASV_1306	Ascomycota	Eurotiomycetes	Eurotiales	Aspergillaceae	Penicillium	bialowiezense	0	0	0	0	0	0	0	0	0	0	0	0	0	0	0	0	0	0	0	0	0	0	0	0	0	0	0	0	0	0	0	0	0	0	0	0	0	0	0	0	0	0	0
ASV_1308	Ascomycota	Dothideomycetes	Mycosphaerellales	Teratosphaeriaceae	Teratosphaeria	agapanthi	0	0	0	0	0	0	0	0	0	8	0	0	7	0	0	0	0	0	0	0	0	0	0	0	0	0	0	0	0	0	0	0	0	0	0	0	0	0	0	0	0	0	0
ASV_1311	Ascomycota	Dothideomycetes	Capnodiales	Capnodiales_fam_Incertae_sedis	Capnodiales_gen_Incertae_sedis	proteae	0	0	0	0	0	0	0	0	0	0	0	0	0	0	0	0	0	0	0	0	0	0	0	0	0	0	0	0	0	0	0	0	0	0	0	0	0	0	0	0	0	0	0
ASV_1331	Ascomycota	Eurotiomycetes	Eurotiomycetes_ord_Incertae_sedis	Eurotiomycetes_fam_Incertae_sedis	Eurotiomycetes_gen_Incertae_sedis	lobatum	0	0	0	0	0	0	0	0	0	0	0	0	0	0	0	0	0	0	0	0	0	4	0	0	0	0	0	0	0	0	0	0	0	0	0	0	0	0	0	0	0	0	0
ASV_1332	Ascomycota	Dothideomycetes	Dothideomycetes_ord_Incertae_sedis	Dothideomycetes_fam_Incertae_sedis	Radulidium	epichloes	0	0	0	0	0	0	0	0	0	0	0	0	0	0	0	0	0	0	4	0	0	0	0	0	0	0	0	0	0	0	0	0	9	0	0	0	4	0	0	0	0	0	0
ASV_1341	Ascomycota	Dothideomycetes	Pleosporales	Phaeosphaeriaceae	Phaeosphaeriaceae_gen_Incertae_sedis	gahniae	0	0	0	0	0	0	0	0	0	0	0	0	0	0	0	0	0	0	0	0	0	0	0	0	0	0	0	0	0	0	0	0	0	0	0	0	0	0	0	0	0	0	0
ASV_1348	Fungi_phy_Incertae_sedis	Fungi_cls_Incertae_sedis	Fungi_ord_Incertae_sedis	Fungi_fam_Incertae_sedis	Fungi_gen_Incertae_sedis	Fungi_sp_incertae_sedi	0	0	0	0	0	0	0	0	0	0	0	0	0	0	0	0	0	0	0	0	0	0	0	0	0	0	0	0	0	0	0	0	0	0	0	0	0	0	0	0	0	0	0
ASV_1349	Ascomycota	Lecanoromycetes	Lecanorales	Scoliciosporaceae	Scoliciosporum	pandanicola	0	0	0	0	0	0	0	0	0	0	0	2	0	0	0	0	0	0	0	0	0	0	0	0	0	0	3	0	0	0	0	0	0	0	0	0	0	0	0	0	0	0	0
ASV_1368	Basidiomycota	Tremellomycetes	Filobasidiales	Filobasidiaceae	Filobasidium	wieringae	0	0	0	0	0	0	0	0	0	0	0	0	0	0	2	0	0	0	0	0	0	0	4	0	0	0	0	4	0	0	0	0	0	0	0	0	0	0	2	0	0	0	3
ASV_1369	NA	NA	NA	NA	NA	NA	0	0	0	0	0	0	0	0	0	0	0	0	0	0	0	0	0	0	0	0	0	0	0	0	0	0	0	0	0	12	0	0	0	0	0	0	0	0	0	0	0	0	0
ASV_1370	Ascomycota	Dothideomycetes	Pleosporales	Melanommataceae	Praetumpfia	obducens	0	0	0	0	0	0	0	0	0	0	0	0	0	0	0	0	0	0	0	0	0	0	0	0	0	0	0	0	0	0	0	0	0	0	0	0	0	0	0	0	0	0	0
ASV_1376	Basidiomycota	Agaricomycetes	NA	NA	NA	NA	3	0	5	1	3	1	0	0	3	0	0	0	0	0	0	0	0	0	0	0	0	0	0	0	0	0	0	0	0	0	0	0	0	0	0	0	0	0	0	0	0	0	0
ASV_1377	Ascomycota	Dothideomycetes	Capnodiales	Paradevriesiaceae	Paradevriesia	pseudoamericana	0	0	0	0	0	0	0	0	0	0	0	0	0	0	0	0	0	0	0	0	0	0	0	0	0	0	0	0	0	0	0	0	0	0	0	0	0	0	13	0	0	0	0
ASV_1380	Basidiomycota	Tremellomycetes	Cystofilobasidiales	Cystofilobasidiaceae	Cystofilobasidium	infirmominiatum	0	0	0	0	0	0	0	0	0	0	0	0	0	0	0	0	0	0	0	0	0	0	0	0	0	0	0	0	0	0	0	0	0	0	0	0	0	0	0	0	0	0	0
ASV_1381	Basidiomycota	Tremellomycetes	Tremellales	Cryptococcaceae	Teunia	korlaensis	0	0	0	0	0	0	0	0	0	0	0	0	0	0	0	0	0	0	0	0	0	0	0	0	0	0	0	0	0	0	0	0	11	0	0	0	0	0	0	0	0	0	0
ASV_1383	Basidiomycota	Exobasidiomycetes	Microstromatales	NA	NA	NA	0	0	0	0	0	0	0	0	0	0	0	0	0	0	0	0	0	0	0	0	0	0	0	0	0	0	0	2	0	0	0	0	0	0	0	0	0	0	0	0	0	0	0
ASV_1387	Basidiomycota	Agaricomycetes	Polyporales	Polyporaceae	Trametes	versicolor	0	0	0	0	0	0	0	0	0	0	0	0	2	10	0	0	0	0	0	0	0	0	0	0	0	0	0	0	0	0	0	0	0	0	0	0	0	0	0	0	0	0	0
ASV_1388	Basidiomycota	Microbotryomycetes	NA	NA	NA	NA	0	0	0	0	0	0	0	0	0	0	0	0	0	0	0	0	0	0	0	0	0	0	0	0	0	0	0	0	0	0	0	0	0	0	0	0	0	0	0	0	0	0	0
ASV_1390	Basidiomycota	Tremellomycetes	Tremellales	Bulleraceae	Genolevuria	amylolytica	0	0	0	0	0	0	0	0	0	0	0	0	0	0	0	0	0	0	0	0	0	0	0	0	0	0	0	0	0	0	0	0	0	0	0	0	0	0	0	0	0	0	0
ASV_1395	Ascomycota	Ascomycota_cls_Incertae_sedis	Ascomycota_ord_Incertae_sedis	Ascomycota_fam_Incertae_sedis	Ascomycota_gen_Incertae_sedis	eucalypti	0	0	0	0	0	0	0	0	0	0	0	0	0	0	0	0	0	0	0	0	0	0	0	0	0	0	0	0	0	0	0	0	0	0	0	0	0	0	0	0	0	0	0
ASV_1397	Ascomycota	Dothideomycetes	Pleosporales	Melanommataceae	Uzbekistanica	rosae-hissaricae	0	0	0	0	0	0	0	0	0	0	0	0	0	0	0	0	0	0	0	0	0	0	0	0	0	0	0	0	0	0	0	0	0	0	0	0	0	0	0	0	0	0	0
ASV_1406	Ascomycota	Dothideomycetes	Mycosphaerellales	Teratosphaeriaceae	Pseudoteratosphaeria	africana	0	0	0	0	0	0	0	0	0	0	0	0	0	0	8	0	0	0	0	0	0	0	0	0	0	0	0	0	0	0	0	0	0	0	0	0	0	0	0	0	0	0	0
ASV_1407	Ascomycota	Saccharomycetes	Saccharomycetales	Pichiaceae	Pichia	fermentans	0	0	0	0	0	0	0	0	0	0	1	0	0	0	0	0	0	0	0	0	0	0	0	0	0	0	0	0	0	0	0	0	0	0	0	0	0	0	0	0	0	0	0
ASV_1418	Basidiomycota	Agaricomycetes	Polyporales	Polyporales_fam_Incertae_sedis	Polyporales_gen_Incertae_sedis	subglobispora	0	0	0	0	0	0	0	0	0	0	0	0	0	0	0	0	0	0	0	0	0	0	0	0	0	0	0	0	0	0	0	0	0	0	0	0	0	0	0	0	0	0	0
ASV_1449	Ascomycota	Dothideomycetes	Mytilinidiales	Mytilinidiaceae	Lophium	arboricola	0	0	0	0	0	0	0	0	0	0	0	0	0	0	0	0	0	0	0	0	0	0	0	0	0	0	0	0	0	0	0	0	0	0	0	0	0	0	0	0	0	0	0
ASV_1452	Ascomycota	Dothideomycetes	Capnodiales	NA	NA	NA	0	0	0	0	0	0	0	0	0	0	0	0	0	0	0	0	0	0	0	0	0	0	0	0	0	0	0	3	0	0	0	0	0	0	0	0	0	0	0	0	0	0	0
ASV_1502	Basidiomycota	Tremellomycetes	Tremellales	Sirobasidiaceae	Fibulobasidium	murrhardtense	0	0	0	0	0	0	0	0	0	0	0	0	0	3	0	0	0	0	5	0	0	0	0	0	0	0	0	5	0	0	0	0	0	0	0	0	0	0	0	0	0	0	0
ASV_1504	Ascomycota	Sordariomycetes	Xylariales	Amphisphaeriaceae	Microdochium	novae-zelandiae	0	0	0	0	0	0	0	0	0	0	0	0	0	0	0	0	0	0	0	0	0	0	0	0	0	0	0	0	0	0	0	0	0	0	0	0	0	0	0	0	0	6	0
ASV_1526	NA	NA	NA	NA	NA	NA	0	0	0	0	0	0	0	0	0	0	0	0	0	0	4	0	0	0	0	0	0	0	0	0	0	0	0	0	0	0	0	0	0	0	0	0	0	0	0	0	0	0	0
ASV_1535	Ascomycota	Dothideomycetes	Pleosporales	Massarinaceae	Exosporium	tiliae	0	0	0	0	0	0	0	0	0	0	0	0	0	0	0	0	0	0	0	0	0	0	0	0	0	0	0	0	0	0	0	0	0	0	0	0	0	0	0	0	0	0	0
ASV_1563	Ascomycota	Eurotiomycetes	Eurotiales	Aspergillaceae	Penicillium	fellutanum	0	0	0	0	0	0	0	0	0	0	0	0	0	0	0	0	0	0	0	0	0	0	0	0	0	0	0	0	0	0	0	0	0	0	0	0	0	0	0	0	0	0	0
ASV_1650	Basidiomycota	Agaricomycetes	Amylocorticiales	Amylocorticiaceae	Plicaturopsis	faginea	0	0	0	0	0	0	0	0	0	0	0	0	0	0	0	0	0	0	0	0	0	0	0	0	0	0	0	0	0	0	0	0	0	0	0	0	0	0	0	0	0	0	0
ASV_1680	Basidiomycota	Agaricomycetes	NA	NA	NA	NA	0	0	0	0	0	0	0	0	0	0	0	0	0	0	0	0	0	0	0	0	0	0	0	0	0	0	0	0	0	0	0	0	0	0	0	0	0	0	0	0	0	0	0
ASV_1681	Ascomycota	Sordariomycetes	Hypocreales	NA	NA	NA	0	0	0	0	0	0	0	0	0	0	0	0	0	0	0	0	0	0	0	0	0	0	0	0	0	0	0	0	0	0	0	0	0	0	0	0	0	0	0	0	0	0	0
ASV_1697	Basidiomycota	Pucciniomycetes	Septobasidiales	Septobasidiaceae	Auriculoscypha	anacardiicola	0	0	0	0	0	0	0	0	0	0	0	0	0	0	0	0	0	0	0	0	0	0	0	0	0	0	0	0	0	0	0	0	0	0	0	0	0	0	0	0	0	0	0
ASV_1877	Basidiomycota	Tremellomycetes	Filobasidiales	Piskurozymaceae	Piskurozyma	silvicola	0	0	0	0	0	0	0	0	0	0	0	0	0	0	0	0	0	0	0	0	0	0	0	0	0	0	0	0	0	0	0	0	0	0	0	0	0	0	0	0	0	0	0
** Samples removed from the analysis
[truncated: 65 more columns]

## Sheet: Table_S4
Table S3.2 Kruskal-Wallis rank sum test with Chi-square and p-values between Shannon Index and Height, Tree Location (Loc), and Month
Response	Chi-squared	p-value
Height	5.582	0.061
Loc	0.083	0.959
Month	67.761	3.248-10

## Sheet: Table_S5
Tables S3.3 Observed and estimated alpha diversity for each sampling period and corresponding barplots.
Period	S.obs	Chao1	Shannon	Gini Simpson
2019_03	96	103	2.66623	0.857778
2019_04	165	172.5	3.18421	0.930543
2019_05	142	143.364	2.18521	0.793032
2019_06	118	119.615	1.40202	0.562991
2019_07	98	103.5	1.05894	0.440038
2019_08	143	144.875	2.04927	0.790446
2019_09	172	173.111	2.79593	0.883153
2019_10	152	157.143	2.00291	0.755525
2019_11	170	170.6	2.81926	0.860524
2019_12	124	124	2.35845	0.824011
2020_01	138	138	3.13615	0.916162
2020_02	203	205	3.76194	0.952734

## Sheet: Table_S6
Table S4.1 Log2 fold change in ASV abundance during "warm" months; positive Log2 fold change indicates increased abundance whereas negative Log2 fold change indicates decreased abudance.
ASV_ID	Phylum	Class	Order	Family	Genus	Species	Mean of normalised counts for all samples	Log2 fold change	Standard Error	Wald statistic	Wald test p-value	BH adjusted p-values
ASV_1	Ascomycota	Dothideomycetes	Cladosporiales	Cladosporiaceae	Cladosporium	angustiherbarum	58998.1	2.7269	0.713079	3.82411	0.000131243	0.0015611
ASV_4	Basidiomycota	Tremellomycetes	Cystofilobasidiales	Mrakiaceae	Itersonilia	perplexans	6556.94	-8.33876	1.08006	-7.72068	1.15712e-14	2.61509e-12
ASV_9	Ascomycota	Dothideomycetes	Pleosporales	Pleosporaceae	Alternaria	alstroemeriae	10901.7	2.46359	0.970291	2.53902	0.0111164	0.0440757
ASV_10	Basidiomycota	Agaricomycetes	Corticiales	Vuilleminiaceae	Vuilleminia	alni	5954.15	-5.4636	1.20648	-4.52854	5.93935e-06	0.000191756
ASV_27	Ascomycota	Leotiomycetes	Erysiphales	Erysiphaceae	Blumeria	americana	1282.85	-4.05946	1.14741	-3.53793	0.000403279	0.0033756
ASV_39	Basidiomycota	Agaricomycetes	Agaricales	Physalacriaceae	Cylindrobasidium	asperior	620.13	-5.31973	1.40801	-3.77818	0.000157981	0.00178518
ASV_41	Ascomycota	Dothideomycetes	Pleosporales	Pleosporaceae	Stemphylium	majusculum	1093.76	4.1029	1.18301	3.46817	0.000524016	0.00422956
ASV_47	Ascomycota	Eurotiomycetes	Chaetothyriales	Herpotrichiellaceae	Capronia	carceris	420.518	-3.40563	1.1888	-2.86477	0.00417306	0.0222515
ASV_69	Basidiomycota	Tremellomycetes	Tremellales	Cryptococcaceae	Kwoniella	shivajii	235.412	-3.31676	1.09166	-3.03827	0.00237938	0.0153726
ASV_70	Basidiomycota	Tremellomycetes	Cystofilobasidiales	Mrakiaceae	Tausonia	pamirica	154.085	-2.8898	1.05468	-2.73999	0.00614414	0.0289287
ASV_72	Basidiomycota	Tremellomycetes	Tremellales	Bulleribasidiaceae	Dioszegia	hungarica	385.054	-3.01995	1.22716	-2.46093	0.0138577	0.0486472
ASV_75	Ascomycota	Candelariomycetes	Candelariales	Candelariaceae	Candelariella	pacifica	311.365	-4.38881	1.33163	-3.29582	0.000981333	0.00715423
ASV_85	Basidiomycota	Agaricomycetes	Agaricomycetes_ord_Incertae_sedis	Agaricomycetes_fam_Incertae_sedis	Agaricomycetes_gen_Incertae_sedis	serpens	239.691	-6.75835	1.38317	-4.88613	1.02837e-06	4.64825e-05
ASV_110	Ascomycota	Sordariomycetes	Hypocreales	Nectriaceae	Thyronectria	lamyi	165.043	-5.63337	1.41182	-3.99016	6.60284e-05	0.000994829
ASV_111	Ascomycota	Leotiomycetes	Erysiphales	Erysiphaceae	Erysiphe	aucubae	152.864	7.88158	1.48604	5.30376	1.13443e-07	6.40954e-06
ASV_113	Ascomycota	Lecanoromycetes	Lecanorales	Scoliciosporaceae	Scoliciosporum	anakeestiicola	77.3602	-4.70553	1.08345	-4.34308	1.40497e-05	0.000352803
ASV_135	Ascomycota	Dothideomycetes	Mycosphaerellales	Neodevriesiaceae	Neodevriesia	fraserae	194.105	-2.72816	1.11706	-2.44228	0.0145947	0.0486472
ASV_143	Basidiomycota	Agaricomycetes	Polyporales	Polyporaceae	Coriolopsis	hainanensis	150.925	6.25871	1.07436	5.82552	5.69362e-09	6.43379e-07
ASV_153	Basidiomycota	Agaricomycetes	Cantharellales	Cantharellales_fam_Incertae_sedis	Cantharellales_gen_Incertae_sedis	dingjieense	25.9891	-4.96036	1.33474	-3.71635	0.00020212	0.00190301
ASV_154	Basidiomycota	Agaricomycetes	Polyporales	Polyporaceae	Trametes	versicolor	76.12	-5.31165	1.11316	-4.77167	1.82706e-06	6.88192e-05
ASV_162	Ascomycota	Dothideomycetes	Mycosphaerellales	Teratosphaeriaceae	Neophaeothecoidea	proteae	91.2414	-2.83408	1.13193	-2.50375	0.0122884	0.0449845
ASV_189	Basidiomycota	Tremellomycetes	Cystofilobasidiales	Cystofilobasidiaceae	Cystofilobasidium	macerans	197.84	-3.22907	1.2074	-2.6744	0.0074864	0.0345291
ASV_193	Ascomycota	Dothideomycetes	Pleosporales	Leptosphaeriaceae	Leptosphaeria	triseptatus	77.2483	-6.55574	1.17975	-5.5569	2.74609e-08	2.06872e-06
ASV_196	Basidiomycota	Microbotryomycetes	Sporidiobolales	Sporidiobolaceae	Rhodosporidiobolus	colostri	65.0441	-3.05294	1.14908	-2.65685	0.0078874	0.035651
ASV_204	Ascomycota	Sordariomycetes	Hypocreales	Hypocreales (order)	Hypocreales (order)	Hypocreales (order)	55.9468	-4.76003	1.27259	-3.74044	0.000183699	0.00188709
ASV_224	Ascomycota	Sordariomycetes	Hypocreales	Nectriaceae	Nectria	eustromatica	36.5059	-5.45563	1.27466	-4.28006	1.86846e-05	0.000422273
ASV_231	Basidiomycota	Exobasidiomycetes	Microstromatales	Microstromataceae	Microstroma	bacarum	74.4545	3.44987	1.37392	2.51097	0.0120399	0.0449845
ASV_234	Ascomycota	Leotiomycetes	Phacidiales	Phacidiaceae	Darkera	picea	44.7005	4.26953	1.27846	3.33959	0.000839008	0.00653848
ASV_243	Basidiomycota	Agaricomycetes	Russulales	Bondarzewiaceae	Heterobasidion	araucariae	46.6714	-4.82934	1.24856	-3.86792	0.000109767	0.00137819
ASV_270	Ascomycota	Dothideomycetes	Pleosporales	Pleosporaceae	Pyrenophora	cynosuri	86.361	3.44716	1.19199	2.89195	0.00382859	0.02131
ASV_281	Ascomycota	Sordariomycetes	Hypocreales	Hypocreaceae	Trichoderma	virilente	32.897	-5.30545	1.31095	-4.04701	5.1875e-05	0.000837411
ASV_284	Ascomycota	Leotiomycetes	Erysiphales	Erysiphaceae	Podosphaera	yulii	43.0443	4.07392	1.09427	3.72296	0.0001969	0.00190301
ASV_291	Basidiomycota	Microbotryomycetes	Leucosporidiales	Leucosporidiaceae	Leucosporidium	yakuticum	41.565	-5.64505	1.2551	-4.49769	6.86954e-06	0.000194065
ASV_302	Ascomycota	Dothideomycetes	Mycosphaerellales	Mycosphaerellaceae	Xenoramularia	neerlandica	19.7194	-4.54951	1.22759	-3.70606	0.00021051	0.00190301
ASV_307	Ascomycota	Leotiomycetes	Helotiales	Sclerotiniaceae	Sclerencoelia	fraxinicola	31.0504	-5.2151	1.39359	-3.74221	0.000182406	0.00188709
ASV_338	Ascomycota	Leotiomycetes	Leotiomycetes (class)	Leotiomycetes (class)	Leotiomycetes (class)	(class)	43.247	-4.70651	1.28635	-3.6588	0.000253399	0.00220262
ASV_339	Basidiomycota	Agaricomycetes	Agaricales	Hymenogastraceae	Hebeloma	lactariolens	29.5486	-5.14018	1.23649	-4.15709	3.22332e-05	0.000560362
ASV_354	Ascomycota	Sordariomycetes	Diaporthales	Valsaceae	Cytospora	prunicola	21.883	-4.70833	1.11529	-4.22162	2.42548e-05	0.000498325
ASV_381	Basidiomycota	Malasseziomycetes	Malasseziales	Malasseziaceae	Malassezia	restricta	13.7558	-3.5482	1.22807	-2.88925	0.00386157	0.02131
ASV_396	Ascomycota	Sordariomycetes	Hypocreales	Bionectriaceae	Bionectriaceae_gen_Incertae_sedis	aloicola	22.0853	5.07326	1.30441	3.8893	0.000100533	0.0013365
ASV_412	Basidiomycota	Tremellomycetes	Tremellales	Cuniculitremaceae	Kockovaella	haikouensis	41.563	-2.94853	1.20643	-2.444	0.0145253	0.0486472
ASV_444	Ascomycota	Leotiomycetes	Helotiales	Vandijckellaceae	Vandijckella	johannae	19.5946	-3.1425	1.25587	-2.50224	0.0123409	0.0449845
ASV_455	Ascomycota	Dothideomycetes	Pleosporales	Phaeosphaeriaceae	Phaeosphaeriaceae_gen_Incertae_sedis	gahniae	20.6909	-2.88567	1.16557	-2.47575	0.0132956	0.0476954
ASV_470	Basidiomycota	Agaricomycetes	Russulales	Stereaceae	Stereum	bisporum	17.0927	-3.39733	1.11571	-3.045	0.00232683	0.0153726
ASV_499	Ascomycota	Dothideomycetes	Pleosporales	Coniothyriaceae	Hazslinszkyomyces	aloes	15.0421	-3.16331	1.19659	-2.6436	0.00820291	0.0356511
ASV_517	Basidiomycota	Agaricomycetes	Polyporales	Polyporaceae	Fomes	subtephropora	16.2778	-3.14696	1.24956	-2.51845	0.0117874	0.0449845
ASV_540	Basidiomycota	Tremellomycetes	Tremellales	Bulleribasidiaceae	Derxomyces	taiwanicus	3.99852	2.48541	0.977051	2.54379	0.0109658	0.0440757
ASV_559	Basidiomycota	Tremellomycetes	Filobasidiales	Filobasidiaceae	Naganishia	albida	16.92	-3.38629	1.20221	-2.81673	0.00485155	0.0243656
ASV_572	Ascomycota	Dothideomycetes	Pleosporales	Cucurbitariaceae	Fenestella	parafenestrata	10.7111	-3.20389	1.09514	-2.92556	0.00343836	0.0210019
ASV_583	Ascomycota	Sordariomycetes	Xylariales	Xylariales_fam_Incertae_sedis	Xylariales_gen_Incertae_sedis	australiensis	13.4789	4.36198	1.09747	3.97456	7.05085e-05	0.000995932
ASV_584	Basidiomycota	Agaricomycetes	Cantharellales	Hydnaceae	Sistotrema	phycophila	29.5875	-5.14442	1.23614	-4.16169	3.15904e-05	0.000560362
ASV_643	Ascomycota	Dothideomycetes	Capnodiales	Cladosporiaceae	Cladosporium	aphidis	11.4264	-3.25956	1.23049	-2.64899	0.00807331	0.0356511
ASV_650	Basidiomycota	Pucciniomycetes	Septobasidiales	Septobasidiaceae	Septobasidium	anacardiicola	10.7853	-3.61118	1.24596	-2.89831	0.00375174	0.02131
ASV_674	Basidiomycota	Cystobasidiomycetes	Cystobasidiales	Cystobasidiaceae	Occultifur	foliicola	10.1044	-3.50919	1.24479	-2.81911	0.00481576	0.0243656
ASV_695	Basidiomycota	Agaricomycetes	Polyporales	Polyporaceae	Ganoderma	sanduense	9.7457	-3.45019	1.15802	-2.97939	0.00288825	0.0181318
ASV_698	Ascomycota	Dothideomycetes	Capnodiales	Neodevriesiaceae	Neodevriesia	bulbillosa	6.03276	-2.70451	1.07805	-2.50869	0.0121178	0.0449845
ASV_704	Basidiomycota	Agaricostilbomycetes	Agaricostilbales	Ruineniaceae	Ruinenia	fanjingshanensis	9.53859	-3.41777	1.22628	-2.78711	0.00531808	0.0261176
ASV_725	Basidiomycota	Agaricomycetes	Cantharellales	Ceratobasidiaceae	Rhizoctonia	carotae	9.1799	-3.35664	1.17357	-2.8602	0.00423369	0.0222515
ASV_734	Ascomycota	Sordariomycetes	Xylariales	Xylariales_fam_Incertae_sedis	Hansfordia	cubensis	9.1568	3.76561	1.13585	3.31523	0.000915664	0.006898
ASV_766	Ascomycota	Dothideomycetes	Mycosphaerellales	Mycosphaerellaceae	Pseudocercospora	madagascariensis	8.22718	3.60674	1.10957	3.25058	0.0011517	0.00813387
ASV_813	Ascomycota	Dothideomycetes	Dothideales	Saccotheciaceae	Pseudosydowia	louisecottisiae	7.29154	3.42024	1.12578	3.03811	0.00238071	0.0153726
ASV_841	Basidiomycota	Tremellomycetes	Cystofilobasidiales	Mrakiaceae	Krasilnikovozyma	fibulata	7.4691	-3.02014	1.17036	-2.58052	0.00986527	0.042067
ASV_849	Basidiomycota	Agaricomycetes	Agaricales	Tubariaceae	Tubaria	pallidissima	7.32063	-2.98748	1.1641	-2.56634	0.0102777	0.0430142
ASV_921	Basidiomycota	Agaricomycetes	Auriculariales	Exidiaceae	Exidiopsis	interrupta	6.31162	-2.74671	1.12513	-2.44123	0.0146372	0.0486472
ASV_958	Ascomycota	Saccharomycetes	Saccharomycetales	Debaryomycetaceae	Diutina	catenulata	6.3536	3.19296	1.10525	2.8889	0.00386597	0.02131
ASV_1048	Basidiomycota	Agaricomycetes	Hymenochaetales	Hymenochaetaceae	Fuscoporia	australiana	5.3551	2.66403	0.958195	2.78026	0.00543154	0.0261176
ASV_1171	Basidiomycota	Agaricomycetes	Agaricales	Tricholomataceae	Tricholomataceae_gen_Incertae_sedis	brunneocaperata	4.46961	2.62624	1.07085	2.45248	0.0141874	0.0486472
ASV_1332	Ascomycota	Dothideomycetes	Dothideomycetes_ord_Incertae_sedis	Dothideomycetes_fam_Incertae_sedis	Radulidium	epichloes	3.98896	2.43269	0.954488	2.54869	0.0108129	0.0440757

## Sheet: Figure_S1
Figure S3.1 24 h SplitR back trajectories during sampling period.

## Sheet: Figure_S2
Figure S3.2 Annual fluctuations in air temperature and humidity level over the period between March 2019 and February 2020.
