# Supplementary material for: Unlocking the air: DNA metabarcoding sheds light on seasonal fungal dynamics in a temperate floodplain forest
Source: Copernicus journal article supplement (doi:10.5194/egusphere-2026-372), 2026-01-30

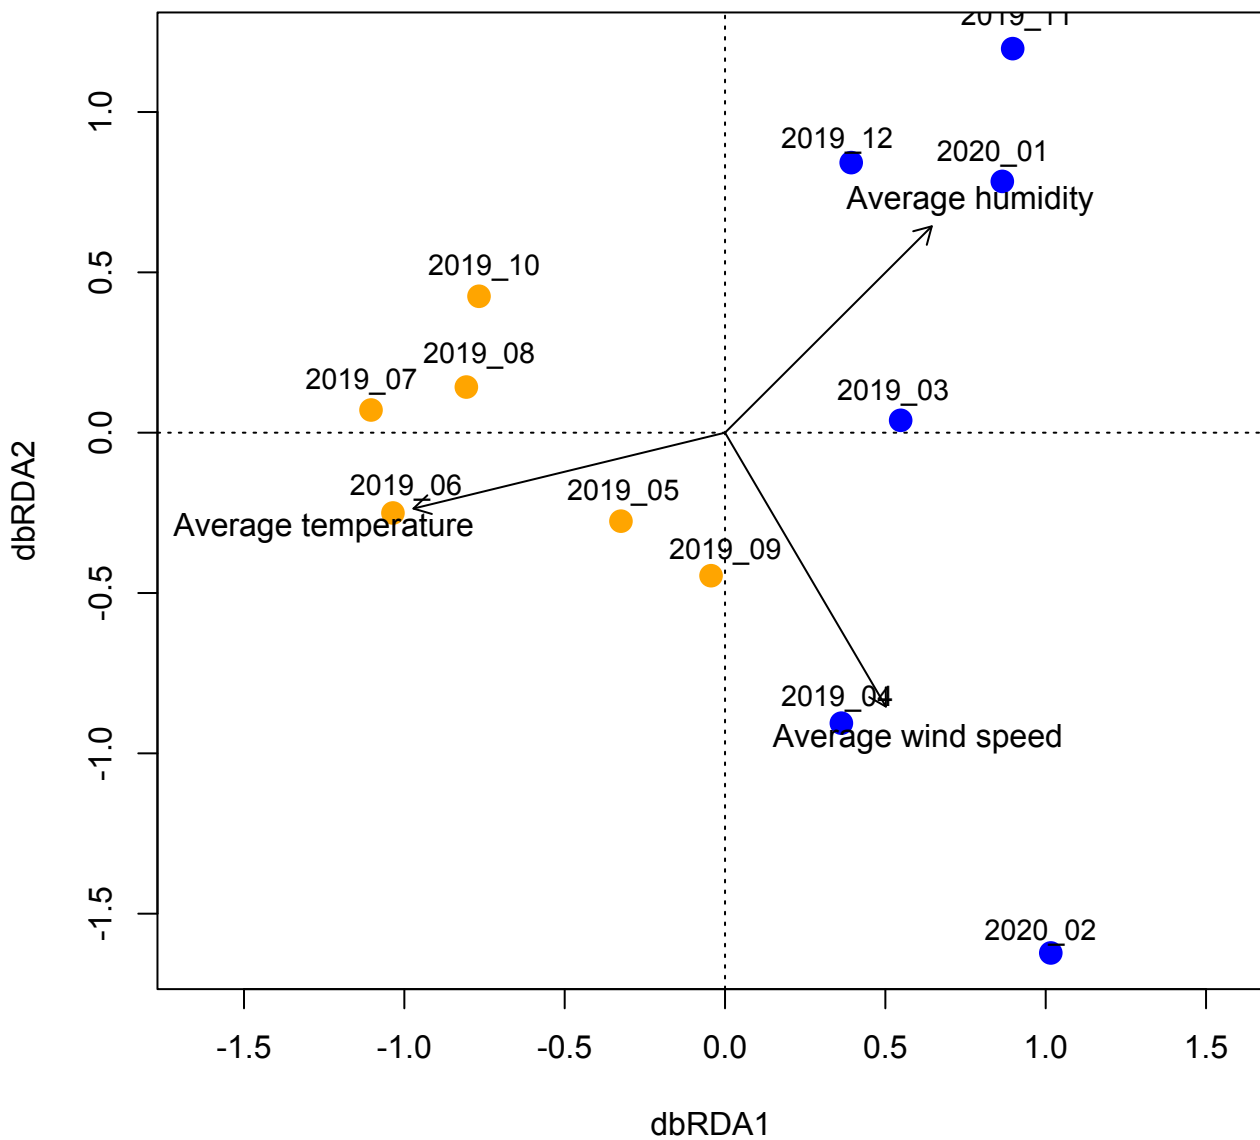

Supplement: Supplementary file [file egusphere-2026-372-AC2-supplement.pdf]
